# Supplementary material for: Smoking and suicidal behaviours in a sample of US adults with low mood: a retrospective analysis of longitudinal data
Source: PubMed Central journal article supplement — BMJ Open. 2012 Jun 8;2(3):e000876. doi: 10.1136/bmjopen-2012-000876 (PMC3371579; doi:10.1136/bmjopen-2012-000876), 2012-06-08
Supplement: bmjopen-2012-000876.draft_revisions.pdf [file bmjopen-2012-000876.draft_revisions.pdf]

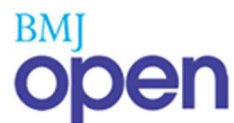

**Smoking and suicidal behaviors in a sample of US adults  
with low mood:  
a prospective analysis**

|                                 |                                                                                                                                                                                                                                                                                                                      |
|---------------------------------|----------------------------------------------------------------------------------------------------------------------------------------------------------------------------------------------------------------------------------------------------------------------------------------------------------------------|
| Journal:                        | <i>BMJ Open</i>                                                                                                                                                                                                                                                                                                      |
| Manuscript ID:                  | bmjopen-2012-000876                                                                                                                                                                                                                                                                                                  |
| Article Type:                   | Research                                                                                                                                                                                                                                                                                                             |
| Date Submitted by the Author:   | 17-Jan-2012                                                                                                                                                                                                                                                                                                          |
| Complete List of Authors:       | Covey, Lirio; Columbia University, Psychiatry; New York State Psychiatric Institute, Clinical Therapeutics<br>Berlin, Ivan; Hôpital Pitié-Salpêtrière-Université P&M Curie, Faculté de médecine, Pharmacology<br>Hu, Mei-Chen; Columbia University Medical Center, Psychiatry<br>Hakes, Jahn; U.S. Bureau of Census, |
| <b>Primary Subject Heading</b>: | Smoking and tobacco                                                                                                                                                                                                                                                                                                  |
| Secondary Subject Heading:      | Addiction                                                                                                                                                                                                                                                                                                            |
| Keywords:                       | Suicide & self-harm < PSYCHIATRY, Adult psychiatry < PSYCHIATRY, EPIDEMIOLOGY                                                                                                                                                                                                                                        |
|                                 |                                                                                                                                                                                                                                                                                                                      |

SCHOLARONE™  
Manuscripts

1  
2  
3  
4  
5  
6 **Smoking and suicidal behaviors in a sample of US adults with low mood:**  
7  
8  
9 **a prospective analysis**  
10

11 **Lirio S. Covey<sup>a</sup>, Ivan Berlin<sup>b</sup>, Mei-Chen Hu<sup>c</sup>, Jahn K. Hakes<sup>d</sup>**  
12

- 13  
14  
15  
16  
17 a) New York State Psychiatric Institute, Department of Psychiatry, Columbia University,  
18 1051 Riverside Drive, New York, NY 10032, United States  
19  
20  
21 b) Département de Pharmacologie, Hôpital Pitié-Salpêtrière-Assistance publique-Hôpitaux  
22 de Paris-Faculté de médecine, Université P.& M. Curie - INSERM U894, 47,bd de  
23 l'Hôpital, 75013 Paris, France  
24  
25  
26  
27 c) Department of Psychiatry, Columbia University Medical Center, 1051 Riverside Drive,  
28 New York, NY 10032, United States  
29  
30  
31  
32 d) Center for Administrative Records Research and Applications, U.S. Census Bureau, 4700  
33 Silver Hill Rd., Suitland, MD 20746, United States  
34  
35  
36  
37  
38  
39  
40  
41  
42  
43  
44  
45  
46

47 Corresponding author: Lirio S. Covey, New York State Psychiatric Institute, Department of  
48 Psychiatry, Columbia University, 1051 Riverside Drive, New York, NY 10032, United States. E-  
49 mail: lsc3@columbia.edu  
50  
51  
52  
53  
54  
55  
56  
57  
58  
59  
60

**ABSTRACT**

**Objective:** To investigate whether: 1) smoking predicts suicide related outcomes (SRO) independently of socio-demographic and psychiatric risk factors, 2) smoking abstinence affects the suicide risk, 3) the relationship is bi-directional.

**Design:** Longitudinal data obtained in Wave 1 (2001-2002) and Wave 2 (2004-2005) of the National Epidemiologic Survey of Alcohol and Related Conditions.

**Setting:** Face-to-face interviews conducted with persons in the community.

**Participants:** US adults (43,093) aged 18 years or older were interviewed in Wave 1; 34,653 participants were re-interviewed three years later. For the present study, the sample was the subset of persons (N=7,352) who at the Wave 2 interview answered affirmatively regarding the presence of low mood lasting two weeks or more during the past three years. Females were 64.1%; the ethnic/racial distribution was White=71.4%, Blacks=10.6%; Hispanic =11.2%; Asian/Pacific Islander = 3.5%; American Indian = 3.3%.

**Main outcome measures:** SRO composed of any of three items: 1) want to die, 2) suicidal ideation, 3) suicide attempt.

**Results:** Current and former smoking in Wave 1 predicted increased risk for Wave 2 SRO independently of socio-demographic characteristics, psychiatric history, and prior SRO measured in Wave 1 (Adjusted Odds Ratio (AOR) =1.41, 95% CI=1.28 to 1.55 for current smoking, and 1.32, 95% CI=1.21 to 1.43 for former smoking). In comparisons with persistent non-smokers, risk for future SRO was highest among relapsers (AOR=3.42, 95% CI=2.85 to 4.11); next highest among beginning smokers (AOR=1.82, 95% CI=1.51 to 2.19); and lowest among long-term (four+ years) former smokers (AOR=1.22, 95% CI=1.12-1.34). In comparisons with

1  
2  
3 persistent current smokers, risk reduction was evident with long-term ( $p=0.0001$ ) but not shorter-  
4  
5 term ( $p=0.17$ ) abstinence. A bi-directional relationship was not observed.  
6  
7

8 **Conclusion:** Suicidal behaviour is another harmful consequence of smoking. Further research  
9  
10 is needed to understand how regular smoking and smoking abstinence affect the risk of SRO.  
11  
12  
13  
14  
15  
16  
17  
18  
19  
20  
21  
22  
23  
24  
25  
26  
27  
28  
29  
30  
31  
32  
33  
34  
35  
36  
37  
38  
39  
40  
41  
42  
43  
44  
45  
46  
47  
48  
49  
50  
51  
52  
53  
54

55 INTRODUCTION  
56  
57  
58  
59  
60

1  
2  
3  
4  
5  
6  
7  
8  
9  
10  
11  
12  
13  
14  
15  
16  
17  
18  
19  
20  
21  
22  
23  
24  
25  
26  
27  
28  
29  
30  
31  
32  
33  
34  
35  
36  
37  
38  
39  
40  
41  
42  
43  
44  
45  
46  
47  
48  
49  
50  
51  
52  
53  
54  
55  
56  
57  
58  
59  
60

Suicide is a leading cause of death worldwide. Close to one million persons die from suicide each year. The World Health Organization predicts that by 2020 suicide deaths will rise to 1.5 million (1). Completed suicides are largely predicted by the wish to die, thoughts of suicide, and unsuccessful previous suicidal attempts (2), making it important to understand the risks posed by suicide related outcomes (SRO). A history of mental disorders (3-5) and particular demographic characteristics (female gender, younger age, unmarried status, and unemployment) are putative risk factors for suicide and SRO (2). Tobacco use, long known as a major risk factor for numerous medical illnesses (6), and recently, for psychiatric outcomes as well (7, 8) has received increasing attention for its potential contribution to the risk of completed suicides and SRO (9). The veracity and dynamics of such a pernicious relationship has implications for suicide prevention. Smoking is a modifiable behaviour; reducing the prevalence of smoking may offer a pathway towards reducing the suicide rate.

A link between smoking and suicide was observed as early as 1976 by Doll and Peto in their study of mortality due to smoking in male British doctors (10). Numerous clinical and epidemiological studies that subsequently investigated the issue are in general, but not universal, agreement in finding a significant association between smoking and suicide and suicidal behaviors. Three studies based on cross-sectional epidemiological data that used the nicotine dependence diagnosis to assess smoking behavior found a positive association between smoking and SRO (11-13); none could infer causality, however, due to lack of information on the relative timing between smoking behaviors and the SRO. More relevant to the aims of the present study are the findings from several longitudinal studies which utilized community based data. Three of those prospective studies (14-16) found that current smoking predicted suicidal behaviors even after controlling for the effects of demographic and psychiatric variables; four studies did not

1  
2  
3 find a positive relationship (17-20). The effect of smoking abstinence on risk of SRO is also  
4  
5 unclear. A study of young adults followed for 10 years found that current, but not past, cigarette  
6  
7 smoking predicted suicidal thoughts and attempt (14). Another study found that former smokers  
8  
9 initially showed higher age-adjusted incidence rates of suicidal ideation compared to non-  
10  
11 smokers (16); however, after more extensive adjustment with depressive disorder, anxiety  
12  
13 symptoms, and alcohol dependence, the difference was no longer statistically significant. A  
14  
15 study based on data from the NESARC Wave 1 initially found that longer duration of abstinence  
16  
17 decreased risk for SRO, but this effect disappeared upon controlling for psychiatric comorbidity  
18  
19 (21). A protective or exacerbating impact of smoking abstinence on the risk of suicide-related  
20  
21 behaviors would have considerable significance for promoting and managing smoking cessation  
22  
23 attempts and preventing SRO and suicide. A further question of theoretical and practical  
24  
25 importance is whether there is mutual causation between smoking and suicidal behaviors. In  
26  
27 longitudinal data obtained from adolescents, the single study that has addressed this question  
28  
29 thus far found that smoking predicted subsequent suicidal ideation and suicide attempts but prior  
30  
31 suicidality was not associated with subsequent smoking (15).  
32  
33  
34  
35  
36  
37  
38

39 The present study was conducted to address these conundrums of the smoking-suicide  
40  
41 relationship: 1) whether smoking predicts SRO independently of putative demographic and  
42  
43 psychiatric risk factors, 2) whether smoking abstinence, and its corollary, duration of smoking  
44  
45 abstinence affects the suicide risk, and 3) whether the relationship is uni- or bi-directional.  
46  
47 Important methodological conditions permitting valid assessment of these questions were  
48  
49 present, concomitantly, in the two-wave format of the National Epidemiological Survey of  
50  
51 Alcohol and Related Conditions (NESARC) (22): a longitudinal design, a large sample, and  
52  
53 extensive data on important potential confounders. In addition, access to a sample of persons  
54  
55  
56  
57  
58  
59  
60

1  
2  
3 with low mood, who are recognized to have a greater probability of experiencing suicidal  
4 behaviours (3, 4), provided the more sensitive context for detecting a more valid and precise  
5 estimate of the risk potential of smoking for future SRO (23).  
6  
7  
8  
9

## 10 11 12 METHODS:

13  
14  
15 Sample: The NESARC interviews were conducted with persons in households, military  
16 personnel living off base, and individuals living in group quarters such as boarding houses,  
17 shelters, and college dorms. Data were collected to obtain a representative national sample of  
18 US adults. In Wave 1 (2001-2002), face-to-face interviews were completed with 43,093 persons  
19 aged 18 years or older. The overall response rate was 81.0%. Blacks, Hispanics, and young  
20 adults (18-24 years) were oversampled. The Wave 1 sample was re-interviewed in Wave 2  
21 (2004-2005) three years later (mean interval=36.6 months, s.e.=2.62) with an overall response  
22 rate based on the Wave 1 sample of 86.7% (N=34,653). Data for the present study were obtained  
23 from a subset (N=7,352) comprised of persons who answered affirmatively at the Wave 2  
24 interview to the question concerning the presence of low mood and, as a result, were further  
25 queried regarding the occurrence of an SRO during the three years prior to the Wave 2 interview.  
26  
27  
28  
29  
30  
31  
32  
33  
34  
35  
36  
37  
38  
39

40  
41 The NESARC sample size was chosen to be sufficiently large to produce nationally  
42 representative proportions for the study of substance abuse and dependence and mental disorders  
43 by demographic group with confidence intervals equal to or smaller than extant studies. The  
44 NESARC study used a complex survey design and sampling weights upon responses to adjust  
45 for sample selection procedures, non-response from selected households or individuals,  
46 oversampling (of young adults, Blacks, and Hispanics), and non-response at the Wave 2 time  
47 point. The weights and survey design effects have been incorporated into the following results.  
48  
49  
50  
51  
52  
53  
54  
55  
56  
57  
58  
59  
60

1  
2  
3 Other methodological details of the NESARC Wave 1 and Wave 2 studies have been described  
4 extensively elsewhere (24-26).  
5  
6

7  
8 Variables: The dependent variable was SRO, comprised by the items on want to die,  
9 suicidal ideation, suicidal attempt reported in Wave 2, measured as a dichotomous variable (none  
10 of the three=0; any of the three=1). The main predictor variable was smoking status in Wave 1,  
11 i.e., non-smoker, former smoker, or current smoker. A non-smoker had responded “No” to each  
12 of the questions regarding lifetime use of at least 100 cigarettes, at least 50 cigars, smoked a pipe  
13 at least 50 times, used snuff at least 20 times, and used chewing tobacco at least 20 times.  
14  
15 Following the coding rule used in the NESARC, all tobacco users were labelled as smokers for  
16 the present analysis. A former smoker was defined as a “Yes” responder to the prior questions  
17 who also reported having stopped smoking or tobacco use at least one year ago. A current  
18 smoker was a “Yes” respondent who had smoked or used tobacco within the past year. Users of  
19 cigars, pipes, snuff, or chewing tobacco who did not smoke cigarettes comprised 2% (129/7352)  
20 of the sample.  
21  
22

23  
24 The smoking status variable (i.e., never, former, current) rather than nicotine dependence  
25 was selected to assess tobacco use history because: 1) the adequacy of the DSM-IV criteria,  
26 followed in the AUDADIS-IV, as a valid measure of nicotine dependence remains controversial  
27 (27,28), and 2) response to the question on never, current or former smoking is easier to elicit in  
28 the clinical setting, with more validity, than responses to a multi-item measure of tobacco use for  
29 which no consensus, stand-alone instrument yet exists (27, 28). To categorize respondents' long-  
30 term or recent status as former or current smokers, a smoking change variable was created with  
31 the following subgroups according to their report of smoking at Waves 1 and 2: 1) non-smoker  
32 to non-smoker, 2) former smoker to former smoker, 3) current smoker to former smoker, 4)  
33  
34  
35  
36  
37  
38  
39  
40  
41  
42  
43  
44  
45  
46  
47  
48  
49  
50  
51  
52  
53  
54  
55  
56  
57  
58  
59  
60



1  
2  
3 current smoker to current smoker, 5) non-smoker to current smoker, 6) former smoker to current  
4  
5  
6 smoker, and 7) non-smoker to former smoker.

7  
8 Covariates considered potential confounders or effect modifiers because of their known  
9  
10 correlations with smoking and/or SRO and measured at Wave 1 were: demographic  
11  
12 characteristics (age, gender, race/ethnicity, marital status, education, employment status, income,  
13  
14 urban residence, geographic region), the DSM-IV Axis I and Axis II disorders, and prior SRO.  
15  
16 The Axis I disorders were categorized into lifetime mood disorders (major depressive disorder,  
17  
18 dysthymia, bipolar I and bipolar II), anxiety disorders (panic disorder, social phobia, specific  
19  
20 phobia, post-traumatic stress disorder, generalized anxiety disorder), alcohol use disorders  
21  
22 (alcohol abuse or dependence), and other substance use disorders (drug abuse or dependence). A  
23  
24 history of Attention Deficit Hyperactivity Disorder (ADHD), queried only at Wave 2, was used  
25  
26 among the Wave 1 predictors, its lifetime quality presumed since the DSM-IV criteria for ADHD  
27  
28 include the presence of ADHD symptoms before age seven. All ten of the Axis II personality  
29  
30 disorders measured in AUDADIS-IV (shown in Table 1) were included as well.  
31  
32  
33  
34  
35

36  
37 Assessment: For both Waves 1 and 2, the Alcohol Use Disorder and Associated  
38  
39 Disabilities Interview Schedule (AUDADIS-IV) was administered by interviewers from the U.S.  
40  
41 Census Bureau. The reliability and validity of the DSM-IV diagnoses obtained through the  
42  
43 AUDADIS-IV have been demonstrated in clinical and general samples in the U.S. and in other  
44  
45 countries (29).  
46  
47

48  
49 Statistical Analysis: Percentages for categorical independent variables were calculated  
50  
51 within the analytical, at-risk, sample (Table 1) and the complementary Wave 2 sample (no low  
52  
53 mood, Supplemental Data Table S1). For the at-risk sample, the crude effects on Wave 2 SRO of  
54  
55 individual Wave 1 variables were assessed by unadjusted odds ratios (OR) and 95% confidence  
56  
57  
58  
59  
60

1  
2  
3 intervals (CI) obtained from univariate logistic regressions. To control for potential confounding  
4  
5 and determine the independent effects of the latter predictor variables on Wave 2 SRO, multiple  
6  
7 logistic regression models were performed and adjusted odds ratios (AOR) and 95% confidence  
8  
9 intervals (CI) were obtained. A complementary regression as specified in Granger (30) was  
10  
11 used to test the opposite temporal relationship – that is, whether prior SRO exerted an effect on  
12  
13 current smoking status in Wave 2. All models were estimated with the PROC  
14  
15 SURVEYLOGISTIC function of SAS statistical software version 9.2, with the results verified  
16  
17 through an internal statistical review at the U.S. Census Bureau.  
18  
19

20  
21  
22 For most demographic control variables, missing values, reported in Table 1, were  
23  
24 replaced through imputation. The exception to this method was for the identification of suicide  
25  
26 related outcomes (SRO), where the 12-18 individuals reporting “unknown” for the three SRO-  
27  
28 defining questions in Wave 2 were set to “no” responses for the purposes of classification. We  
29  
30 conducted sensitivity analysis (a) comparing results from the at-risk subsample to those from the  
31  
32 entire Wave 2 NESARC sample, (b) using different measurements of smoking status (including  
33  
34 additional quitting cut points in time for short-term cessation), (c) using different categorizations  
35  
36 of changes in smoking status, (d) using different sets of control variables with and without  
37  
38 education, Axis II personality disorders, and census region, and (e) including help-seeking  
39  
40 behavior controls.  
41  
42  
43  
44  
45  
46  
47

## 48 RESULTS

### 49 *Sample characteristics at Wave 1*

50  
51  
52 The prevalence of any SRO was 25.6%. Prevalence rates for individual SROs were  
53  
54 23.4% for “wish to die”, 19.3% for “suicidal ideation”, and 6.1% for “suicide attempt”. By  
55  
56  
57  
58  
59  
60

1  
2  
3 smoking status, 31.7% were current smokers, 17.8% were former smokers, and 50.5% were  
4  
5 never smokers. Weighted percentages and standard errors for categories of the study variables  
6  
7 are shown in Table 1, Columns 1 and 2.  
8  
9

10 Distributions from the at-risk sample (N=7,352) and from the complementary sample of  
11  
12 27,301 Wave 2 respondents (shown in Supplemental Data Table S1) were compared. The  
13  
14 complementary sample had included respondents who were skipped out of the SRO section of  
15  
16 the interview because they did not report depressed mood. Chi-squared tests found statistically  
17  
18 significant differences between the at-risk and the complementary samples for all of the variables  
19  
20 reported in the supplemental table, a function of the large sample sizes and the survey design  
21  
22 effects of the NESARC. Confirming the at-risk status of the analytical sample, the prevalence  
23  
24 rates of the psychiatric disorders (DSM-IV Axis I and Axis II) were markedly higher among  
25  
26 them than the rest of the sample. Other demographic characteristics previously associated with  
27  
28 higher risk of suicide and SROs were also higher in the at-risk subsample: more females, more  
29  
30 lower and fewer high income responders, fewer married, and more separated or never married,  
31  
32 and more unemployed individuals. Differences by race/ethnicity, age, urban versus rural  
33  
34 residence, and geographic area were also observed.  
35  
36  
37  
38  
39  
40  
41  
42

#### 43 *Effects of Wave 1 predictors on Wave 2 SRO*

44

45 For reference, the unadjusted odds ratios and 95% CI for risk of future SRO of individual  
46  
47 study variables, indicating relationships uncontrolled for covariance effects are shown in Table 1,  
48  
49 Columns 3 and 4. The adjusted odds ratios and 95% CI based on a multivariate model on Wave  
50  
51 2 SRO, controlling for covariance from the Wave 1 predictors, are shown in Table 1, Columns 5  
52  
53 and 6.  
54  
55  
56  
57  
58  
59  
60

1  
2  
3 The adjusted analysis showed significantly higher risk for Wave 2 SRO of both Wave 1  
4 current smokers (AOR=1.41, 95% CI= 1.28-1.55) and former smokers (AOR=1.32, 95%  
5 CI=1.21-1.43) relative to nonsmokers. The difference in point estimates of risk between current  
6 versus former smokers was not significant ( $\chi^2=1.95$ ,  $p = 0.16$ ).  
7  
8  
9  
10  
11

12 The multivariate model also showed significant, independent risk for future SRO for  
13 female gender, Hispanic race/ethnicity, young age, cohabiting/divorced/separated marital status,  
14 lower income, being unemployed, residence other than the Northeast region. Having reported a  
15 SRO in Wave 1 was the strongest predictor of reporting a Wave 2 SRO (AOR=3.49, 95% CI=  
16 3.18- 3.84). Of the DSM-IV Axis I disorders, only anxiety disorders (AOR= 1.08, 95% CI=1.01-  
17 1.17) and attention deficit hyperactivity disorder (AOR=1.56, 95% CI=1.36-1.79) showed  
18 significant independent prediction of Wave 2 SRO. The adjusted odds ratio for mood disorders  
19 indicated a decreased risk of future SRO (AOR= 0.77, 95% CI= 0.70-0.84), in contrast to the  
20 increased risk observed in the simple regression (OR=2.04, 95% CI=1.92-2.17). Likewise, the  
21 significant predictive effects on Wave 2 SRO for the alcohol use disorders and the substance use  
22 disorders seen in the simple regressions were not apparent in the multivariate model.  
23  
24 Significantly elevated risk for Wave 2 SRO was seen for only three of the DSM-IV Axis II  
25 disorders: borderline personality, schizotypal, and avoidant personality. Ranked in decreasing  
26 order, the statistically significant predictors of SRO risk, other things being equal, in the present  
27 sample of adults reporting low mood were: prior SRO, borderline personality disorder, ADHD,  
28 schizotypal disorder, current smoking, former smoking, avoidant personality disorder, and  
29 selected demographic characteristics.  
30  
31  
32  
33  
34  
35  
36  
37  
38  
39  
40  
41  
42  
43  
44  
45  
46  
47  
48  
49  
50  
51  
52  
53  
54

55 *Smoking status change from Wave 1 to Wave 2: effects on Wave 2 SRO*  
56  
57  
58  
59  
60

1  
2  
3 Table 2 shows that the great majority of the sample (90.5%) did not change their smoking  
4 status between Waves 1 and 2. Among the remaining 9.5%, over half (5.3%) had made a shift  
5 from being current smokers to former smokers; more than a fourth (2.6%) were non-smokers in  
6 Wave 1 who became current smokers in Wave 2; and a much smaller proportion (<2%) were  
7 former smokers in Wave 1 who relapsed to smoking in Wave 2. A seventh category, non-  
8 smokers in Wave 1 who reported former smoking status in Wave 2, produced a sample size that  
9 was too small for further assessment.  
10  
11  
12  
13  
14  
15  
16  
17  
18  
19

20 Table 2 shows the risk for SRO among all categories of ever-smokers compared to the  
21 persistent non-smokers. The highest risk was seen for smokers who had relapsed (former to  
22 current smoker) (AOR=3.42, 95% CI=2.85-4.11); the new smokers (non-smoker to current  
23 smoker) showed the next highest risk (AOR=1.82, 95% CI=1.51-2.19); and the persistent former  
24 smokers (reported abstinence status at both Wave 1 and 2 interviews) showed the lowest risk  
25 (AOR=1.22, 95% CI=1.12-1.34).  
26  
27  
28  
29  
30  
31  
32  
33  
34  
35  
36

### 37 *Long-term abstinence, relapse, and new smoking*

38 The risk for Wave 2 SRO of a) long-term quitters relative to recent quitters and b) that of  
39 new current smokers in Wave 2 (relapsed or began to smoke) relative to the risk of smokers  
40 during both study Waves was examined. Given the three-year interval between Waves 1 and 2  
41 and the coding requirement that former smoking status is assigned only upon reporting of at least  
42 12 months of abstinence, persons in Category 2 of Table 2 (former to former smokers) would  
43 have been abstinent for at least four years. Persons who shifted from current smoking in Wave  
44 1 to former smoking in Wave 2 (Category 3) would have been abstinent for a maximum of three  
45 years. Pair-wise chi squared tests for equality of the coefficients compared the AOR among the  
46  
47  
48  
49  
50  
51  
52  
53  
54  
55  
56  
57  
58  
59  
60

1  
2  
3 group categories, as shown below Table 2. The lower risk of recent former smokers (Category  
4  
5 3) when compared to the persistent current smokers (Category 4) was not significant ( $p=0.26$ ),  
6  
7  
8 whereas the lower risk of long-term smokers (Category 2) compared to the persistent current  
9  
10 smokers (Category 4) was significant ( $p=0.0001$ ). These data suggest that a reduction in risk for  
11  
12 future SRO with past smoking, relative to current smoking, becomes apparent only after a  
13  
14 considerable period of smoking abstinence.  
15  
16

17  
18 The second comparison which focused on new smoking in Wave 2 found that, relative to  
19  
20 persistent current smokers, those who relapsed or began to smoke in Wave 2 had significantly  
21  
22 higher risks for Wave 2 SRO than the persistent current smokers ( $p=0.0001$ ,  $p=0.04$ ,  
23  
24 respectively).  
25  
26

### 27 28 29 *Is there a bi-directional relationship?* 30

31  
32 Section A in Table 3 shows the results of multivariate models for predicting Wave 2 SRO  
33  
34 as a function of smoking in Wave 1 and other Wave 1 covariates. Section B in Table 3 shows  
35  
36 results for predicting Wave 2 current smoking as a function of SRO history in Wave 1 and other  
37  
38 Wave 1 covariates, following the Granger test for directional causality (30). As in Table 1, Table  
39  
40 3A shows a predictive effect of Wave 1 current smoking and former smoking on Wave 2 SRO.  
41  
42 Table 3B shows that persons with Wave 1 SROs were *less* likely to report current smoking status  
43  
44 at Wave 2 ( $AOR=0.81$ ,  $95\% CI=0.72-0.90$ ). These results refute the hypothesis of a bi-  
45  
46  
47 directional temporal relationship whereby there might be mutual causation between SRO and  
48  
49 smoking.  
50  
51

52  
53 To understand these temporal relationships further, the effects of the interaction of Wave  
54  
55 1 smoking status (current vs. nonsmoker and former vs. nonsmoker) with history of prior SRO  
56  
57  
58  
59  
60

1  
2  
3 (Table 4, Panels A and B) were examined. The outcome variable in Table 4, Panel A is Wave 2  
4 SRO; the outcome variable in Table 4, Panel B, is Wave 2 current smoking. In each model, the  
5  
6 reference group comprised the non-smokers with no prior SRO at Wave 1.  
7  
8

9  
10 Table 4, Panel A shows the following: 1) in the presence of prior SRO, the risk for Wave  
11  
12 2 SRO is much higher across the smoking categories (for current, former, and non-smokers,  
13 (AORs > 3.5) than for their counterparts with no prior SRO; 2) in the absence of prior SRO, the  
14  
15 risk estimates for Wave 2 SRO among current and former smokers in Wave 1 are significantly  
16  
17 higher (95% CI are 1.41-1.74 and 1.28-1.57, respectively) compared to the reference group  
18  
19 (while notably lower than their counterparts with prior SRO), 3) also in the absence of prior  
20  
21 SRO, the risk for Wave 2 SRO among Wave 1 former smokers is lower than for Wave 1 current  
22  
23 smokers (AORs=1.42 and 1.56, respectively), but the difference is small and not statistically  
24  
25 significant (Wald chi-square=2.69, p-value = 0.101). Thus, other characteristics (e.g.,  
26  
27 demographics and psychopathology) being equal, current smoking and former smoking are valid  
28  
29 predictors of an *initial* SRO; however, once a person has had a SRO, the risk of *recurrence* is  
30  
31 fully predicted by that prior SRO and smoking status information does not significantly adjust  
32  
33 the risk prediction.  
34  
35  
36  
37  
38  
39

40  
41 The predictive model on Wave 2 current smoking in Panel B of Table 4 shows that, as  
42  
43 would be expected, Wave 1 current smokers, regardless of prior SRO, have a considerably  
44  
45 higher risk of being a current smoker in Wave 2 compared to the reference group of Wave 1  
46  
47 nonsmokers with no prior SRO. Wave 1 former smokers with no prior SRO showed a  
48  
49 significantly higher risk for current smoking in Wave 2 (AOR=2.20; 95% CI=1.77- 2.31); by  
50  
51 contrast, their counterparts with prior SRO did not (AOR=1.15; 95% CI=0.83, 1.61).  
52  
53  
54  
55 Nonsmokers with prior SRO showed a risk for Wave 2 SRO that was lower than nonsmokers  
56  
57  
58  
59  
60



1  
2  
3 without prior SRO. Thus, the effects of prior SRO upon current smoking at Wave 2 differ by  
4  
5 smoking status at Wave 1 – no net effect of prior SRO upon among smokers, but, for former  
6  
7 smokers and nonsmokers, prior SROs predicted a *reduction* in the likelihood of current smoking  
8  
9 in Wave 2. Overall, analysis of the interaction of prior SRO and Wave 1 smoking status shows  
10  
11 nuances but does not fundamentally change the finding from the analysis of main effects seen in  
12  
13 Table 2 that smoking predicts increased risk of SRO but the reverse relationship does not hold.  
14  
15  
16  
17  
18  
19

## 20 DISCUSSION

21  
22 The main findings of the present study are: 1) smoking history, whether current or past,  
23  
24 increases the risk for SRO independently of demographics, psychiatric factors, and prior SRO; 2)  
25  
26 long-term smoking abstinence can reduce that risk; 3) new smoking due to relapse after a period  
27  
28 of abstinence or to current smoking among former non-smokers was associated with an increased  
29  
30 risk of SRO relative to persistent current smoking; 4) the smoking-suicide relationship is not bi-  
31  
32 directional.  
33  
34  
35

36 Strengths and limitation of the study are worth noting. An important strength is the  
37  
38 concomitance of rigorous methods and materials not always present in prior work on the  
39  
40 smoking-suicide question – face-to-face interviews, a longitudinal design, a validated instrument,  
41  
42 a comprehensive range of putative predictors, and a large and clinically relevant sample that  
43  
44 permitted statistical control of the key background factors and comorbidities. A further strength  
45  
46 relevant to the real-world setting is the use of a simple yet meaningful measure of smoking status  
47  
48 (i.e., never, former or current smoking status), that is easy for a questioner to administer and the  
49  
50 respondent to recall and understand. At the same time, study limitations call for cautious  
51  
52 interpretation of the findings. The survey excluded persons who had completed suicide attempts.  
53  
54  
55  
56  
57  
58  
59  
60



1  
2  
3 Using the U.S. rate of 11.1 per 100,000 population per year (31), the Wave 1 sample of 43,093  
4  
5 could be expected to include about 14 persons with completed suicides before Wave 2 (95% CI=  
6  
7 6.8-21.6); introducing a non-trivial, although likely small, selection bias. Second, the present  
8  
9 study sample comprised the self-selected 22% of the 34,653 NESARC Wave 2 participants who  
10  
11 reported low mood during the three-year interval between the interviews. This selectivity yields  
12  
13 findings relevant to mental health settings that are more likely to serve persons experiencing  
14  
15 mood problems; however, they may not generalize to the rest of the NESARC sample or to the  
16  
17 national population. Nevertheless, allowing for missing data from persons who did not report  
18  
19 depressed mood, further analysis on the total sample using the same regression model applied to  
20  
21 the present, at-risk sample also showed significant, although lower, predictive effects of current  
22  
23 and former smoking history on future SRO (AOR=1.36, 95% CI=1.25-1.48 and AOR=1.18, 95%  
24  
25 CI=1.08-1.28, respectively). Third, the present study did not assess the effects of medical  
26  
27 conditions which are possibly causally related, albeit in different directions, to smoking and to  
28  
29 SRO. A fourth limitation and a direction for further research is the aggregate nature of the  
30  
31 dependent variable (i.e., SRO); analysis of individual SRO could yield more meaningful  
32  
33 findings.  
34  
35  
36  
37  
38  
39

40  
41 Other than the present one, there have been seven prospective epidemiological studies of  
42  
43 smoking and SRO (14-20). The positive prediction of future SRO reported here was also  
44  
45 observed in three studies (14-16). Problems of recall due to the large, ten year interval between  
46  
47 data time points could explain the negative finding of the study by Kessler et al (17) while the  
48  
49 younger age of the samples in two studies (19-20), could have masked a future effect. Of  
50  
51 clinical and public health importance is the finding, not reported in prior studies, that longer  
52  
53 abstinence from smoking or tobacco exposure decreased the risk for SRO. The differential risk  
54  
55  
56  
57  
58  
59  
60

1  
2  
3 of SRO according to duration of abstinence observed in the present study but not considered in  
4  
5 the two negative findings regarding past smoking (14, 16) could account for the inconsistent  
6  
7 findings. Notably, the divergence of effects according to longevity of abstinence is consistent  
8  
9 with evidence regarding lung cancer and other smoking-related disorders that risk reduction from  
10  
11 stopping smoking occurs only after multiple years of abstinence (32, 33). Also a new finding  
12  
13 made possible by the longitudinal nature of the data is the increased risk for future SRO among  
14  
15 former smokers and nonsmokers in Wave 1 who relapsed or began to smoke in Wave 2  
16  
17 compared to persistent current smokers. Although both latter effects occurred in small  
18  
19 proportions of the sample, their observed impact on future SRO was high. Relapse and new  
20  
21 smoking during adulthood could be signals of a future SRO. Finally, the data did not indicate a  
22  
23 reverse temporal relationship, as also seen in the study of adolescents (15). Former and non-  
24  
25 smokers with prior SRO in Wave 1 showed lower risk for current smoking in Wave 2 compared  
26  
27 to their counterparts with no prior SRO. Perhaps those former and non-smokers, already inclined  
28  
29 towards the more healthy behaviour of not smoking, were spurred by the prior SRO to undertake  
30  
31 therapeutic actions which included avoidance of smoking. Of interest, exploratory analysis of  
32  
33 Wave 1 data revealed a significant correlation ( $r=0.43$ ,  $p=0.0001$ ) between prior SRO and help-  
34  
35 seeking during the last three years.  
36  
37  
38  
39  
40  
41  
42

43 This analysis provided clarifying information to the long-standing controversies  
44  
45 regarding the effect of current smoking and past smoking on SRO, introduced new information  
46  
47 regarding a protective effect of sustained abstinence for the purpose of reducing risk of SRO, and  
48  
49 disconfirmed the hypothesis tested thus far only in an adolescent sample (15) of a bi-directional  
50  
51 association between smoking and SRO. The neurobiological, genetic, psychiatric and  
52  
53 psychological underpinnings of these observations and their invariance across segments of the  
54  
55  
56  
57  
58  
59  
60

1  
2  
3 wider population (i.e., by age groups, gender, race/ethnicity, cultural groups, and among healthy  
4  
5 versus medically or psychiatrically ill persons) need further investigation. The worrisome, new  
6  
7 observation of increased risk for SRO following relapse or new smoking among former non-  
8  
9 smokers compared to persistent current smokers was observed in a very small proportion of the  
10  
11 ever-smokers; replicating those findings in a larger sample would provide more assurance of  
12  
13 their certainty and the need for therapeutic attention. Furthermore, since significant prediction  
14  
15 from several factors acting as moderators (e.g., gender and race/ethnicity) or mediators (e.g.,  
16  
17 psychiatric illness) was observed, the interactions of those covariates with smoking as they  
18  
19 influence the risk of SRO warrant investigation. Finally, a prospective study of smoking and  
20  
21 individual SRO (16) observed different levels of risk associated with suicidal ideation and  
22  
23 combinations of ideation with suicidal plans and attempts. Thus, the findings yielded by the  
24  
25 present focus on an aggregate measure of SRO warrant testing similar models as applied herein  
26  
27 to the relationships between smoking and individual SRO and combinations of SRO.  
28  
29  
30  
31  
32  
33  
34  
35  
36  
37  
38  
39  
40  
41  
42  
43  
44  
45  
46  
47  
48  
49  
50  
51  
52  
53  
54  
55  
56  
57  
58  
59  
60

1  
2  
3  
4  
5  
6 Copyright. The Corresponding Author has the right to grant on behalf of all authors and does  
7  
8 grant on behalf of all authors, [a worldwide licence](#) to the Publishers and its licensees in  
9  
10 perpetuity, in all forms, formats and media (whether known now or created in the future), to i)  
11  
12 publish, reproduce, distribute, display and store the Contribution, ii) translate the Contribution  
13  
14 into other languages, create adaptations, reprints, include within collections and create  
15  
16 summaries, extracts and/or, abstracts of the Contribution, iii) create any other derivative work(s)  
17  
18 based on the Contribution, iv) to exploit all subsidiary rights in the Contribution, v) the inclusion  
19  
20 of electronic links from the Contribution to third party material where-ever it may be located;  
21  
22 and, vi) licence any third party to do any or all of the above.  
23  
24  
25  
26  
27  
28

29 The National Epidemiologic Survey on Alcohol and Related Conditions was sponsored by the  
30  
31 National Institute on Alcohol Abuse and Alcoholism (NIAAA) and funded in part by the  
32  
33 Intramural Program, NIAAA, National Institutes of Health, with additional support from the  
34  
35 National Institute on Drug Abuse. No funding was obtained for this secondary analysis.  
36  
37  
38  
39  
40

41 All authors have completed the Unified Competing Interest form  
42  
43 ([www.icmje.org/coi\\_disclosure.pdf](http://www.icmje.org/coi_disclosure.pdf). 1) JH received support from NIAAA through the US  
44  
45 Census Bureau for the submitted work; 2) LC, IB, and MC received no specific support for this  
46  
47 work; 3) IB received occasional honoraria for participating in advisory panels of Pfizer Ltd  
48  
49 during the last 3 years; in February, 2011; LC provided educational consultation to a law firm  
50  
51 regarding mood effects of smoking cessation; 4) JK and MH had no relationships with any  
52  
53 company that might have an interest in the submitted work in the previous 3 years; 5) none of the  
54  
55  
56  
57  
58  
59  
60

1  
2  
3 spouses of the authors had financial relationships that may be relevant to the submitted work; 6)  
4  
5 none of the authors had a non-financial interest that may be relevant to the submitted work.  
6  
7

8  
9 Lirio Covey and Ivan Berlin conceptualized this study and, with Mei-Chen Hu, designed the  
10 analysis. Jahn Hakes had full access to all of the data in the study and takes responsibility for the  
11 integrity of the data and the accuracy of the data analysis. Lirio Covey was the lead writer of the  
12 manuscript. All authors participated in the interpretation of findings and writing of the  
13 manuscript. All authors had full access to the statistical reports, tables, and the manuscript; and  
14 take responsibility for the integrity of the data and the accuracy of the data analysis.  
15  
16

17 The employers of the authors had no role in the study design, implementation of the study,  
18 analysis and interpretation of data, in the writing of the report, and the decision to submit the  
19 article for publication.  
20  
21

22 The study is a secondary analysis of data collected by the National Institute of Health-National  
23 Institute of Alcohol and Alcohol Abuse of the US government. Before data collection, each  
24 respondent was informed of the nature of the survey and its potential uses, ensured of  
25 confidentiality, and told that participation was voluntary. All participants signed a consent form  
26 prior to participating in the interviews. The US Census Bureau and the US Office of  
27 Management and Budget reviewed and approved the ethics protocol. Individual data files are  
28 de-identified to prevent full anonymity of participants. Approval for conducting this secondary  
29 analysis of previously collected data was not required.  
30  
31

32 In order to safeguard sensitive personal information, NESARC data are not available for public  
33 use. The restricted use data sets are maintained by the U.S. Census Bureau on behalf of NIAAA,  
34  
35  
36  
37  
38  
39  
40  
41  
42  
43  
44  
45  
46  
47  
48  
49  
50  
51  
52

1  
2  
3  
4  
5  
6  
7  
8  
9  
10  
11  
12  
13  
14  
15  
16  
17  
18  
19  
20  
21  
22  
23  
24  
25  
26  
27  
28  
29  
30  
31  
32  
33  
34  
35  
36  
37  
38  
39  
40  
41  
42  
43  
44  
45  
46  
47  
48  
49  
50  
51  
52  
53  
54  
55  
56  
57  
58  
59  
60

and any requests to use NESARC data for replication or other purposes may be directed to the NIAAA coordinator for NESARC, Aaron White ([whitea4@mail.nih.gov](mailto:whitea4@mail.nih.gov)).

For peer review only

## REFERENCES

1. World Health Organization. *Suicide prevention*. (2010) Retrieved from [http://www.who.int/mental\\_health/prevention/suicide/suicideprevent/en/accessed](http://www.who.int/mental_health/prevention/suicide/suicideprevent/en/accessed) .
2. Nock MK, Borges G, Bromet EJ, et al. Suicide and suicidal behavior. *Epidemiol Rev*. 2008;30 (1):133-54.
3. Tidemalm D, Långström N, Lichtenstein P, et al. Risk of suicide after suicide attempt according to coexisting psychiatric disorder: Swedish cohort study with long term follow-up. *BMJ*. 2008 Nov 18;337:a2205.
4. Harris EC, Barraclough B. Suicide as an outcome for mental disorders. A meta-analysis. *Br. J Psychiatry*, 1997, 170: 205-208.
5. Nock MK, Hwang I, Sampson NA, et al. Mental disorders, comorbidity and suicidal behavior: results from the National Comorbidity Survey Replication. *Mol Psychiatry*. 2010 Aug;15(8):868-76.
6. CDC - Health Effects - Smoking & Tobacco Use, [http://www.cdc.gov/tobacco/basic\\_information/health\\_effects/index.htm](http://www.cdc.gov/tobacco/basic_information/health_effects/index.htm)
7. John U, Meyer C, Rumpf HJ, et al. Smoking, nicotine dependence and psychiatric comorbidity--a population-based study including smoking cessation after three years. *Drug Alcohol Depend*. 2004 ; 76(3):287-95.
8. Choi WS, Patten CA, Gillin JC, et al. Cigarette smoking predicts development of depressive symptoms among U.S. adolescents. *Ann Behav Med*; 1997 Winter;19 (1):42-50.
9. Hughes, J. R. Smoking and suicide: A brief overview. *Drug Alcohol Depend*. 2008; 98 (3), 169–178.

- 1  
2  
3  
4  
5  
6 10. Doll R, Peto R. Mortality in relation to smoking, 20 years' observations on male British  
7 doctors. *BMJ*. 1976; 2 (6051): 1525-1536.  
8  
9  
10  
11 11. Bolton, JM, Robinson J. Population-attributable fractions of Axis I and Axis II mental  
12 disorders for suicide attempts; Findings from a representative sample of the adult, non-  
13 institutionalized US population. *Am J Public Health*, 2010; 100 (12): 2473-2480.  
14  
15  
16  
17  
18 12. Scherrer JF, Grant JD, Agrawal A, et al. Suicidal Behavior, Smoking, and Familial  
19 Vulnerability. *Nicotine Tob Res*. 2011 Nov 11. [Epub ahead of print]  
20  
21  
22  
23  
24 13. Yaworski D, Robinson J, Sareen J, et al. The relation between nicotine dependence and  
25 suicide attempts in the general population. *Can J Psychiatry*. 2011 Mar;56(3):161-70.  
26  
27  
28  
29  
30 14. Breslau N, Schultz LR, Johnson EO, et al. Smoking and the risk of suicidal behavior: a  
31 prospective study of a community sample. *Arch Gen Psychiatry*, 2005; 62 (3): 328-334.  
32  
33  
34  
35  
36 15. Bronisch T, Höfler M, Lieb R. Smoking predicts suicidality: findings from a prospective  
37 community study. *J Affect Disord*. 2008 May;108(1-2):135-45  
38  
39  
40  
41  
42 16. Clarke DE, Eaton WE, Petronis KR, et al. Increased risk of suicidal ideation in smokers  
43 and former smokers compared to never smokers: Evidence from the Baltimore ECA  
44 follow-up study. *Suicide Life Threat Behav*. 2010; 40 (4): 307-318.  
45  
46  
47  
48  
49 17. Kessler RC, Borges G, Sampson N, et al. The association between smoking and  
50 subsequent suicide-related outcomes in the National Comorbidity Survey panel sample.  
51 *Molecular Psychiatry*. 2009; 14(12):1132-42.  
52  
53  
54  
55  
56  
57  
58  
59  
60



- 1  
2  
3  
4  
5  
6  
7  
8  
9  
10  
11  
12  
13  
14  
15  
16  
17  
18  
19  
20  
21  
22  
23  
24  
25  
26  
27  
28  
29  
30  
31  
32  
33  
34  
35  
36  
37  
38  
39  
40  
41  
42  
43  
44  
45  
46  
47  
48  
49  
50  
51  
52  
53  
54  
55  
56  
57  
58  
59  
60
18. Boden JM, Fergusson DM., Horwood LJ. 2008, Cigarette smoking and suicidal behaviour: results from a 25-year longitudinal study. *Psychol Med.* 2008; 38(3): 433-439.
  19. McGee R, Williams S, Nada-Raja S. Is cigarette smoking associated with suicidal ideation among young people? *Am J Psychiatry.* 2005; 162(3):619-20.
  20. Wilcox HC, Anthony JC. The development of suicidal ideation and attempts: an epidemiologic study of first graders followed into young adulthood. *Drug Alcohol Dependence* 2004; 76 (Suppl): S53-S67.
  21. Berlin I, Covey LS, Donohue MC, et al. Duration of smoking abstinence and suicide-related outcomes. *Nicotine Tob Res.* 2011;13(10):887-893.
  22. Grant BF, Stinson FS, Dawson DA, et al. Co-occurrence of 12-month alcohol and drug use disorders and personality disorders in the United States: results from the National Epidemiologic Survey on Alcohol and Related Conditions. *Arch Gen Psychiatry.* 2004;61(4):361-8.
  23. Nordentoft M. Prevention of suicide and attempted suicide in Denmark. Epidemiological studies of suicide and intervention studies in selected risk groups. *Dan Med Bull.* 2007; 54(4):306-69.
  24. Grant BF, Stinson FS, Dawson DA, et al. Prevalence and co-occurrence of substance use disorders and independent mood and anxiety disorders: results from the National Epidemiologic Survey on Alcohol and Related Conditions. *Arch Gen Psychiatry* 2004;61:807–816.
  25. Grant BF, Goldstein RB, Chou SP, et al. Sociodemographic and psychopathologic predictors of first incidence of DSM-IV substance use, mood and anxiety disorders: results from the Wave 2 National Epidemiologic Survey on Alcohol and Related Conditions. *Mol Psychiatry.* 2009 14(11):1051-66. Epub 2008 Apr 22.

- 1  
2  
3  
4  
5  
6 26. Grant BF, Dawson DA, Stinson FS, et al. The Alcohol Use Disorder and Associated  
7 Disabilities Interview Schedule-IV (AUDADIS-IV): reliability of alcohol consumption,  
8 tobacco use, family history of depression and psychiatric diagnostic modules in a general  
9 population sample. *Drug Alcohol Depend.* 2003; 71(1):7-16.  
10  
11  
12  
13 27. Hughes JR, Baker T, Breslau N, et al. Applicability of DSM criteria to nicotine  
14 dependence. *Addiction.* 2011;106(5):894-5  
15  
16  
17  
18  
19 28. Mwenifumbo JC, Tyndale RF. DSM-IV, ICD-10 and FTND: Discordant Tobacco  
20 Dependence Diagnoses in Adult Smokers, 2011; *J Addict Res Ther*, 2:1  
21  
22  
23  
24  
25 29. Ruan WJ, Goldstein RB, Chou SP, et al. The alcohol use disorder and associated  
26 disabilities interview schedule-IV (AUDADIS-IV): reliability of new psychiatric  
27 diagnostic modules and risk factors in a general population sample. *Drug Alcohol*  
28 *Depend.* 2008; 92(1-3):27-36.  
29  
30  
31  
32  
33  
34 30. Granger CWJ. Investigating Causal Relations by Econometric Models and Cross-Spectral  
35 Methods. *Econometrica.* 1969; 37(3):424-438.  
36  
37  
38  
39  
40 31. National Institute of Mental Health, Suicide in the United States, Statistics and  
41 Prevention, NIH Publication No. 06-4594, pp 56-59 [www.nimh.gov](http://www.nimh.gov).  
42  
43  
44  
45 32. Novello, AC. Surgeon General's report on the health benefits of smoking cessation.  
46 *Public Health Rep.* 1990; 105(6): 545-548.  
47  
48  
49  
50  
51 33. Cao, Y, Kenfield S, Song Y, et al. Cigarette Smoking Cessation and Total and Cause-  
52 Specific Mortality: A 22-Year Follow-up Study Among US Male Physicians. *Arch Intern*  
53 *Med* 2011; 171 (21), 1956-1958.  
54  
55  
56  
57  
58  
59  
60

## Supplemental Data:

Table S1: Comparison of Wave 1 characteristics of the at-risk sample with the rest of the Wave 2 NESARC sample. Weighted percentages (%) and standard error (s.e)

| Variable                   | Total Wave 2 sample % | s.e. | At-risk Sample % | s.e. | Rest of sample % | s.e. |
|----------------------------|-----------------------|------|------------------|------|------------------|------|
| Female                     | 52.08                 | 0.16 | 64.13            | 0.40 | 49.02            | 0.17 |
| Race/Ethnicity             |                       |      |                  |      |                  |      |
| White                      | 70.93                 | 0.24 | 71.39            | 0.40 | 70.81            | 0.25 |
| Black                      | 10.75                 | 0.20 | 10.61            | 0.22 | 10.79            | 0.21 |
| Hispanic                   | 11.56                 | 0.10 | 11.20            | 0.15 | 11.65            | 0.12 |
| Asian/Pac. Islander        | 4.36                  | 0.06 | 3.50             | 0.10 | 4.58             | 0.06 |
| Amer. Indian/Alaska Native | 2.40                  | 0.11 | 3.29             | 0.20 | 2.17             | 0.11 |
| Age: 18-19                 | 4.02                  | 0.07 | 4.47             | 0.15 | 3.91             | 0.08 |
| 20-29                      | 17.78                 | 0.14 | 19.28            | 0.30 | 17.40            | 0.15 |
| 30-44                      | 30.90                 | 0.17 | 32.28            | 0.29 | 30.54            | 0.18 |
| 45-64                      | 31.08                 | 0.15 | 31.64            | 0.24 | 30.94            | 0.17 |
| 65 and over                | 16.22                 | 0.10 | 12.32            | 0.25 | 17.21            | 0.12 |
| Household Income:          |                       |      |                  |      |                  |      |
| Less than \$20,000         | 20.35                 | 0.17 | 25.07            | 0.32 | 19.15            | 0.19 |
| \$20,000 to \$34,999       | 19.62                 | 0.13 | 20.84            | 0.27 | 19.31            | 0.15 |
| \$35,000 to \$59,999       | 26.27                 | 0.16 | 24.85            | 0.31 | 26.63            | 0.17 |
| \$60,000 and over          | 33.76                 | 0.16 | 29.24            | 0.33 | 34.91            | 0.17 |
| Marital status:            |                       |      |                  |      |                  |      |
| Married                    | 59.81                 | 0.17 | 54.75            | 0.35 | 61.10            | 0.17 |
| Cohabiting                 | 3.25                  | 0.06 | 3.60             | 0.11 | 3.16             | 0.07 |
| Widowed                    | 6.04                  | 0.07 | 5.37             | 0.12 | 6.21             | 0.08 |
| Divorced                   | 8.45                  | 0.06 | 10.73            | 0.19 | 7.87             | 0.07 |
| Separated                  | 1.98                  | 0.04 | 2.98             | 0.12 | 1.73             | 0.04 |
| Never Married              | 20.46                 | 0.17 | 22.57            | 0.33 | 19.93            | 0.17 |
| Education:                 |                       |      |                  |      |                  |      |
| Less than HS               | 14.65                 | 0.13 | 16.25            | 0.26 | 14.24            | 0.14 |
| High School diploma        | 29.03                 | 0.18 | 29.35            | 0.35 | 28.95            | 0.20 |
| College                    | 56.32                 | 0.22 | 54.40            | 0.38 | 56.81            | 0.23 |
| Unemployed                 | 7.16                  | 0.09 | 12.31            | 0.25 | 5.85             | 0.09 |
| Urban                      | 28.89                 | 0.26 | 30.59            | 0.41 | 28.46            | 0.25 |
| Northeast                  | 19.67                 | 0.08 | 18.57            | 0.15 | 19.95            | 0.10 |
| Midwest                    | 23.15                 | 0.16 | 23.52            | 0.32 | 23.05            | 0.21 |
| South                      | 35.21                 | 0.15 | 34.89            | 0.39 | 35.29            | 0.19 |
| West                       | 21.97                 | 0.11 | 23.02            | 0.23 | 21.71            | 0.15 |

Table S1, continued.

| Variable                       | Total W2 sample | (std. err.) | At-risk Proportion | (std. err.) | Rest of sample | (std. err.) |
|--------------------------------|-----------------|-------------|--------------------|-------------|----------------|-------------|
| Alcohol Use Disorder           | 30.43           | 0.20        | 33.57              | 0.39        | 29.63          | 0.20        |
| Substance Use Disorder         | 10.42           | 0.11        | 15.06              | 0.26        | 9.25           | 0.11        |
| Nicotine Dependence            | 17.47           | 0.13        | 24.33              | 0.37        | 15.73          | 0.13        |
| Anxiety disorder               | 17.88           | 0.17        | 31.00              | 0.34        | 14.55          | 0.17        |
| Mood disorder                  | 21.09           | 0.13        | 41.82              | 0.33        | 15.82          | 0.13        |
| ADHD                           | 2.51            | 0.06        | 5.82               | 0.19        | 1.67           | 0.05        |
| Personality Disorders          |                 |             |                    |             |                |             |
| Borderline                     | 5.89            | 0.08        | 18.44              | 0.28        | 2.70           | 0.07        |
| Schizotypal                    | 3.93            | 0.06        | 11.20              | 0.24        | 2.09           | 0.05        |
| Narcissistic                   | 6.18            | 0.08        | 11.88              | 0.23        | 4.74           | 0.08        |
| Avoidant                       | 2.32            | 0.05        | 6.14               | 0.17        | 1.36           | 0.05        |
| Antisocial                     | 3.63            | 0.07        | 5.86               | 0.21        | 3.07           | 0.07        |
| Dependent                      | 0.43            | 0.02        | 1.36               | 0.09        | 0.19           | 0.01        |
| Obsessive-Compulsive           | 8.07            | 0.10        | 13.50              | 0.31        | 6.69           | 0.09        |
| Paranoid                       | 4.33            | 0.07        | 9.66               | 0.21        | 2.98           | 0.06        |
| Schizoid                       | 3.06            | 0.06        | 6.44               | 0.21        | 2.21           | 0.05        |
| Histrionic                     | 1.80            | 0.04        | 3.68               | 0.15        | 1.32           | 0.04        |
| Any Axis I or Axis II Disorder | 54.70           | 0.22        | 69.72              | 0.35        | 50.89          | 0.24        |
| Smoking status:                |                 |             |                    |             |                |             |
| Current smoker – W1            | 27.02           | 0.17        | 31.65              | 0.38        | 25.85          | 0.19        |
| Former smoker – W1             | 19.58           | 0.16        | 17.84              | 0.28        | 20.02          | 0.17        |
| Never smoked – W1              | 53.40           | 0.19        | 50.51              | 0.42        | 54.13          | 0.20        |
| Total                          | n=34,653        |             | n= 7,352           |             | n=27,301       |             |

NOTES: Values for control variables in this table (demographics and psychiatric history) are taken from Wave 1 of NESARC, but weighted using W2WEIGHT, as inclusion in sample requires knowing whether respondent had an SRO between waves. All psychiatric disorders are assigned only a lifetime diagnosis.

STROBE Statement—Checklist of items that should be included in reports of *cohort studies*

|                              | Item No | Recommendation                                                                                                                                                                                                                                                                                                                                                                                                |
|------------------------------|---------|---------------------------------------------------------------------------------------------------------------------------------------------------------------------------------------------------------------------------------------------------------------------------------------------------------------------------------------------------------------------------------------------------------------|
| <b>Title and abstract</b>    | 1       | (a) Indicate the study's design with a commonly used term in the title or the abstract<br>(b) Provide in the abstract an informative and balanced summary of what was done and what was found                                                                                                                                                                                                                 |
| <b>Introduction</b>          |         |                                                                                                                                                                                                                                                                                                                                                                                                               |
| Background/rationale         | 2       | Explain the scientific background and rationale for the investigation being reported                                                                                                                                                                                                                                                                                                                          |
| Objectives                   | 3       | State specific objectives, including any prespecified hypotheses                                                                                                                                                                                                                                                                                                                                              |
| <b>Methods</b>               |         |                                                                                                                                                                                                                                                                                                                                                                                                               |
| Study design                 | 4       | Present key elements of study design early in the paper                                                                                                                                                                                                                                                                                                                                                       |
| Setting                      | 5       | Describe the setting, locations, and relevant dates, including periods of recruitment, exposure, follow-up, and data collection                                                                                                                                                                                                                                                                               |
| Participants                 | 6       | (a) Give the eligibility criteria, and the sources and methods of selection of participants. Describe methods of follow-up<br>(b) For matched studies, give matching criteria and number of exposed and unexposed                                                                                                                                                                                             |
| Variables                    | 7       | Clearly define all outcomes, exposures, predictors, potential confounders, and effect modifiers. Give diagnostic criteria, if applicable                                                                                                                                                                                                                                                                      |
| Data sources/<br>measurement | 8*      | For each variable of interest, give sources of data and details of methods of assessment (measurement). Describe comparability of assessment methods if there is more than one group                                                                                                                                                                                                                          |
| Bias                         | 9       | Describe any efforts to address potential sources of bias                                                                                                                                                                                                                                                                                                                                                     |
| Study size                   | 10      | Explain how the study size was arrived at                                                                                                                                                                                                                                                                                                                                                                     |
| Quantitative variables       | 11      | Explain how quantitative variables were handled in the analyses. If applicable, describe which groupings were chosen and why                                                                                                                                                                                                                                                                                  |
| Statistical methods          | 12      | (a) Describe all statistical methods, including those used to control for confounding<br>(b) Describe any methods used to examine subgroups and interactions<br>(c) Explain how missing data were addressed<br>(d) If applicable, explain how loss to follow-up was addressed<br>(e) Describe any sensitivity analyses                                                                                        |
| <b>Results</b>               |         |                                                                                                                                                                                                                                                                                                                                                                                                               |
| Participants                 | 13*     | (a) Report numbers of individuals at each stage of study—eg numbers potentially eligible, examined for eligibility, confirmed eligible, included in the study, completing follow-up, and analysed<br>(b) Give reasons for non-participation at each stage<br>(c) Consider use of a flow diagram                                                                                                               |
| Descriptive data             | 14*     | (a) Give characteristics of study participants (eg demographic, clinical, social) and information on exposures and potential confounders<br>(b) Indicate number of participants with missing data for each variable of interest<br>(c) Summarise follow-up time (eg, average and total amount)                                                                                                                |
| Outcome data                 | 15*     | Report numbers of outcome events or summary measures over time                                                                                                                                                                                                                                                                                                                                                |
| Main results                 | 16      | (a) Give unadjusted estimates and, if applicable, confounder-adjusted estimates and their precision (eg, 95% confidence interval). Make clear which confounders were adjusted for and why they were included<br>(b) Report category boundaries when continuous variables were categorized<br>(c) If relevant, consider translating estimates of relative risk into absolute risk for a meaningful time period |

|                          |    |                                                                                                                                                                            |
|--------------------------|----|----------------------------------------------------------------------------------------------------------------------------------------------------------------------------|
| Other analyses           | 17 | Report other analyses done—eg analyses of subgroups and interactions, and sensitivity analyses                                                                             |
| <b>Discussion</b>        |    |                                                                                                                                                                            |
| Key results              | 18 | Summarise key results with reference to study objectives                                                                                                                   |
| Limitations              | 19 | Discuss limitations of the study, taking into account sources of potential bias or imprecision. Discuss both direction and magnitude of any potential bias                 |
| Interpretation           | 20 | Give a cautious overall interpretation of results considering objectives, limitations, multiplicity of analyses, results from similar studies, and other relevant evidence |
| Generalisability         | 21 | Discuss the generalisability (external validity) of the study results                                                                                                      |
| <b>Other information</b> |    |                                                                                                                                                                            |
| Funding                  | 22 | Give the source of funding and the role of the funders for the present study and, if applicable, for the original study on which the present article is based              |

\*Give information separately for exposed and unexposed groups.

**Note:** An Explanation and Elaboration article discusses each checklist item and gives methodological background and published examples of transparent reporting. The STROBE checklist is best used in conjunction with this article (freely available on the Web sites of PLoS Medicine at <http://www.plosmedicine.org/>, Annals of Internal Medicine at <http://www.annals.org/>, and Epidemiology at <http://www.epidem.com/>). Information on the STROBE Initiative is available at <http://www.strobe-statement.org>.

Table 1: Demographic characteristics, lifetime psychiatric and prior SRO (n=7352)<sup>§\*</sup>.  
Frequencies, odds ratios, and adjusted odds ratios for Wave 2 SRO\*\*

| Variable                 | (1)<br>Weighted<br>mean<br>% | (2)<br>Standard<br>error of<br>mean | (3)<br>OR | (4)<br>95% CI | (5)<br>AOR | (6)<br>95% CI |
|--------------------------|------------------------------|-------------------------------------|-----------|---------------|------------|---------------|
| <b>Smoking history</b>   |                              |                                     |           |               |            |               |
| Current smoker in Wave 1 | 31.65                        | 0.38                                | 1.77      | 1.64, 1.90    | 1.41       | 1.28, 1.55    |
| Former Smoker in Wave 1  | 17.84                        | 0.28                                | 1.16      | 1.07, 1.25    | 1.32       | 1.21, 1.43    |
| Never Smoker in Wave 1   | 50.51                        | 0.42                                | 1.00      |               | 1.00       |               |
| <b>Demographics</b>      |                              |                                     |           |               |            |               |
| Female                   | 64.13                        | 0.40                                | 1.05      | 0.98, 1.12    | 1.13       | 1.04, 1.22    |
| Male                     |                              |                                     | 1.00      |               | 1.00       |               |
| White                    | 71.39                        | 0.40                                | 1.00      |               | 1.00       |               |
| Black                    | 10.61                        | 0.22                                | 0.91      | 0.84, 0.99    | 0.84       | 0.76, 0.92    |
| Hispanic                 | 11.20                        | 0.15                                | 1.10      | 1.04, 1.17    | 1.26       | 1.16, 1.36    |
| Asian/Pacific Islander   | 3.50                         | 0.10                                | 0.74      | 0.67, 0.82    | 0.93       | 0.82, 1.06    |
| American Indian          | 3.29                         | 0.20                                | 0.94      | 0.71, 1.25    | 0.69       | 0.51, 0.92    |
| Age 18-19                | 4.47                         | 0.15                                | 1.00      |               | 1.00       |               |
| Age 20-29                | 19.28                        | 0.30                                | 0.83      | 0.69, 0.98    | 0.77       | 0.63, 0.94    |
| Age 30-44                | 32.28                        | 0.29                                | 0.75      | 0.64, 0.88    | 0.73       | 0.60, 0.90    |
| Age 45-64                | 31.64                        | 0.24                                | 0.66      | 0.56, 0.78    | 0.69       | 0.56, 0.84    |
| Age 65 and over          | 12.32                        | 0.25                                | 0.47      | 0.39, 0.57    | 0.68       | 0.54, 0.86    |
| Married                  | 54.75                        | 0.35                                | 1.00      |               | 1.00       |               |
| Cohabiting               | 3.60                         | 0.11                                | 1.67      | 1.42, 1.96    | 1.27       | 1.07, 1.51    |
| Widowed                  | 5.37                         | 0.12                                | 0.97      | 0.85, 1.10    | 0.92       | 0.78, 1.07    |
| Divorced                 | 10.73                        | 0.19                                | 1.70      | 1.57, 1.84    | 1.20       | 1.10, 1.32    |
| Separated                | 2.98                         | 0.12                                | 1.85      | 1.58, 2.15    | 1.29       | 1.06, 1.56    |
| Never married            | 22.57                        | 0.33                                | 1.35      | 1.24, 1.46    | 0.97       | 0.87, 1.09    |
| Less than High School    | 16.25                        | 0.26                                | 1.17      | 1.04, 1.32    | 1.09       | 0.95, 1.25    |
| High School Diploma      | 29.35                        | 0.35                                | 1.00      |               | 1.00       |               |
| Some College or more     | 54.40                        | 0.38                                | 0.94      | 0.87, 1.02    | 1.08       | 1.00, 1.17    |
| Household income:        |                              |                                     |           |               |            |               |
| Less than \$20,000       | 25.07                        | 0.32                                | 1.71      | 1.57, 1.85    | 1.31       | 1.18, 1.44    |
| \$20,000 to \$34,999     | 20.84                        | 0.27                                | 1.41      | 1.30, 1.52    | 1.18       | 1.07, 1.30    |
| \$35,000 to \$59,999     | 24.85                        | 0.31                                | 1.30      | 1.20, 1.42    | 1.21       | 1.11, 1.32    |
| \$60,000 and over        | 29.24                        | 0.33                                | 1.00      |               | 1.00       |               |
| Unemployed               | 12.31                        | 0.25                                | 1.84      | 1.68, 2.03    | 1.28       | 1.13, 1.45    |
| Northeast                | 18.57                        | 0.15                                | 1.00      |               | 1.00       |               |
| Midwest                  | 23.52                        | 0.32                                | 1.34      | 1.25, 1.42    | 1.33       | 1.21, 1.46    |
| South                    | 34.89                        | 0.39                                | 1.18      | 1.09, 1.27    | 1.14       | 1.04, 1.25    |
| West                     | 23.02                        | 0.23                                | 1.24      | 1.16, 1.33    | 1.25       | 1.15, 1.35    |
| Urban                    | 30.59                        | 0.41                                | 1.08      | 1.02, 1.15    | 1.03       | 0.97, 1.10    |
| Rural                    |                              |                                     | 1.00      |               |            |               |



Table 1, continued.

| Variable                                    | (1)<br>Weighted<br>mean<br>% | (2)<br>Standard<br>error of<br>mean | (3)<br>OR | (4)<br>95% CI | (5)<br>AOR | (6)<br>95% CI |
|---------------------------------------------|------------------------------|-------------------------------------|-----------|---------------|------------|---------------|
| <b>Psychiatric History</b>                  |                              |                                     |           |               |            |               |
| Suicide related outcomes<br>In Wave 1       | 25.55                        | 0.27                                | 3.84      | 3.60, 4.10    | 3.49       | 3.18, 3.84    |
| <b>Lifetime Axis I Disorders</b>            |                              |                                     |           |               |            |               |
| Alcohol Use                                 | 33.57                        | 0.39                                | 1.40      | 1.31, 1.49    | 0.95       | 0.87, 1.04    |
| Substance Use                               | 15.06                        | 0.26                                | 1.75      | 1.61, 1.89    | 0.98       | 0.88, 1.09    |
| Anxiety                                     | 31.00                        | 0.34                                | 1.72      | 1.62, 1.83    | 1.08       | 1.01, 1.17    |
| Mood                                        | 41.82                        | 0.33                                | 2.04      | 1.92, 2.17    | 0.77       | 0.70, 0.84    |
| Attention Deficit<br>Hyperactivity Disorder | 5.82                         | 0.19                                | 2.87      | 2.56, 3.22    | 1.56       | 1.36, 1.79    |
| <b>Personality Disorders</b>                |                              |                                     |           |               |            |               |
| Borderline                                  | 18.44                        | 0.28                                | 4.49      | 4.22, 4.77    | 2.91       | 2.69, 3.16    |
| Schizotypal                                 | 11.20                        | 0.24                                | 3.44      | 3.09, 3.84    | 1.50       | 1.31, 1.72    |
| Narcissistic                                | 11.88                        | 0.23                                | 2.08      | 1.89, 2.29    | 1.03       | 0.92, 1.14    |
| Avoidant                                    | 6.14                         | 0.17                                | 2.97      | 2.66, 3.32    | 1.29       | 1.05, 1.58    |
| Antisocial                                  | 5.86                         | 0.21                                | 1.89      | 1.68, 2.13    | 0.85       | 0.72, 1.01    |
| Dependent                                   | 1.36                         | 0.09                                | 3.44      | 2.74, 4.30    | 1.04       | 0.76, 1.41    |
| Ob-Com                                      | 13.50                        | 0.31                                | 1.53      | 1.39, 1.69    | 0.90       | 0.80, 1.00    |
| Paranoid                                    | 9.66                         | 0.21                                | 2.37      | 2.14, 2.62    | 0.95       | 0.82, 1.10    |
| Schizoid                                    | 6.44                         | 0.21                                | 2.10      | 1.89, 2.33    | 1.01       | 0.88, 1.16    |
| Histrionic                                  | 3.68                         | 0.15                                | 2.10      | 1.82, 2.43    | 0.76       | 0.63, 0.93    |

§ Missing observations for specific variables: Race – 43, Hispanic origin – 2, age – 13, marital status-4, educational attainment – 70, household income-2544, unemployed – 28, Wave 2 individual suicide related outcomes – 12-18 “unknown” change to “no”. Treatment of unknown values in determination of psychiatric diagnosis variables is known only to original NESARC project staff at NIAAA.

\*Persons reporting low mood and responding to questions on suicide related outcomes at the NESARC Wave 2 interview.

\*\*SRO (Suicide related outcome: feel like want to die, suicide ideation, suicide attempt; 0=None, 1=any SRO).

Notes: n=7352. Odds Ratios (OR) based on simple regression models estimating Wave 2 SRO as a function of an individual predictor variable. Adjusted Odds Ratios (AOR) based on a multiple logistic regression estimating Wave 2 SRO as a function of age, sex, race/ethnicity, marital status, income, education, unemployed status, Census region, urban residence, smoking status, Axis I and Axis II disorders (as described in text), and lifetime SRO prior to Wave 1.



Table 2: Smoking status change as reported in NESARC Wave 1 and Wave 2 interviews: effects on Wave 2 suicide related outcomes (SRO)\*

| Smoking status in Wave 1 to Wave 2 | N      | Weighted relative frequency (std. err.) | Wave 2 SRO* |              |
|------------------------------------|--------|-----------------------------------------|-------------|--------------|
|                                    |        |                                         | AOR         | (95% CI)     |
| 1. Nonsmoker to Nonsmoker          | 3653   | 47.8<br>(0.40)                          | 1.00        |              |
| 2. Former to Former smoker         | 1185   | 16.4<br>(0.26)                          | 1.22        | (1.12, 1.34) |
| 3. Current to Former smoker        | 393    | 5.3<br>(0.14)                           | 1.37        | (1.16, 1.63) |
| 4. Current to Current smoker       | 1824   | 26.3<br>(0.35)                          | 1.50        | (1.35, 1.66) |
| 5. Nonsmoker to Current smoker     | 194    | 2.6<br>(0.10)                           | 1.82        | (1.51, 2.19) |
| 6. Former to Current smoker        | (S)    | < 2.0                                   | 3.42        | (2.85, 4.11) |
|                                    | N=7352 |                                         |             |              |

\*Includes wish to die, suicide ideation, suicide attempt

**Notes:** N=7352. AORs are adjusted odds ratios based on multiple logistic regression of Wave 2 SRO as a function of age, sex, race/ethnicity, marital status, income, education, unemployed status, Census region, urban residence, smoking status, Axis I and Axis II disorders (as described in text), and lifetime SRO prior to Wave 1.

The seventh category which consisted of persons who transitioned through a period of smoking to become a former smoker during the last 12 months in Wave 2 produced a sample size that was too small for a valid assessment of risk..

(S)= statistic suppressed to prevent identification of related cell values.

Chi-squared tests for equality of coefficients:

| Smoking status change groups | chi-squared stat. | p-value |
|------------------------------|-------------------|---------|
| 2 v. 3                       | 1.86              | 0.17    |
| 3 v. 4                       | 1.26              | 0.26    |
| 4 v. 5                       | 4.11 *            | 0.04    |
| 5 v. 6                       | 19.0 *            | < .0001 |
| 2 v. 4                       | 16.9 *            | < .0001 |
| 4 v. 6                       | 56.0*             | <.0001  |

\*=Statistically significant at 95% confidence level

Table 3: Effect of smoking status and history of SRO<sup>a</sup> reported at NESARC Wave 1 interview on: a) Wave 2 SRO<sup>a</sup>, and b) Wave 2 current smoking.

|                         | a)<br>ave 2 SRO <sup>a</sup> |              | b)<br>ave 2 Current Smoking |              |
|-------------------------|------------------------------|--------------|-----------------------------|--------------|
|                         | AOR*                         | (95% CI)     | AOR*                        | (95% CI)     |
| Current smoker          | 1.41                         | (1.28, 1.55) | 89.1                        | (80.3, 98.9) |
| Former smoker           | 1.32                         | (1.21, 1.43) | 1.93                        | (1.72, 2.18) |
| Wave 1 SRO <sup>a</sup> | 3.49                         | (3.18, 3.84) | 0.81                        | (0.72, 0.90) |
|                         |                              |              |                             |              |

<sup>a</sup>SRO includes wish to die, suicidal ideation, suicide attempt.

\*Adjusted odds ratio from multiple logistic regression models controlling for demographics and psychiatric history reported at Wave 1 (shown in Table 1)

Table 4 Panel A: Combined AOR\* effects of Wave 1 smoking status and Wave 1 SRO<sup>a</sup> upon Wave 2 SRO

|               | Current smoker, Wave 1 |            | Former smoker, Wave 1 |           | Nonsmoker, Wave 1 |                      |
|---------------|------------------------|------------|-----------------------|-----------|-------------------|----------------------|
|               | AOR                    | 95% CI     | AOR                   | 95% CI    | AOR               | 95% CI               |
| Wave 1 SRO    | 4.77                   | 3.70-5.87  | 4.58                  | 3.60-5.82 | 4.12              | 3.65-4.64            |
| No Wave 1 SRO | 1.56                   | 1.41, 1.74 | 1.42                  | 1.28-1.57 | 1.00              | CI=N.A. <sup>b</sup> |

Table 4 Panel B: Combined AOR\* effects of Wave 1 smoking status and Wave 1 SRO\* upon Wave 2 Current smoking

|               | Current smoker, Wave 1 |             | Former smoker, Wave 1 |           | Nonsmoker, Wave 1 |                      |
|---------------|------------------------|-------------|-----------------------|-----------|-------------------|----------------------|
|               | AOR                    | 95% CI      | AOR                   | 95% CI    | AOR               | 95% CI               |
| Wave 1 SRO    | 76.98                  | 57.60-104.8 | 1.15                  | 0.83-1.61 | 0.70              | 0.60-0.82            |
| No Wave 1 SRO | 82.86                  | 73.7-93.2   | 2.20                  | 1.77-2.31 | 1.00              | CI=N.A. <sup>b</sup> |

<sup>a</sup>SRO includes wish to die, suicidal ideation, suicide attempt

<sup>b</sup>Not applicable

\*Adjusted odds ratio from multiple logistic regression models controlling for demographics and psychiatric history reported at Wave 1 (shown in Table 1)

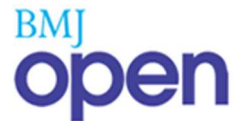

**Smoking and suicidal behaviors in a sample of US adults  
with low mood:  
a longitudinal analysis**

|                                 |                                                                                                                                                                                                                                                                                                                      |
|---------------------------------|----------------------------------------------------------------------------------------------------------------------------------------------------------------------------------------------------------------------------------------------------------------------------------------------------------------------|
| Journal:                        | <i>BMJ Open</i>                                                                                                                                                                                                                                                                                                      |
| Manuscript ID:                  | bmjopen-2012-000876.R1                                                                                                                                                                                                                                                                                               |
| Article Type:                   | Research                                                                                                                                                                                                                                                                                                             |
| Date Submitted by the Author:   | 12-Apr-2012                                                                                                                                                                                                                                                                                                          |
| Complete List of Authors:       | Covey, Lirio; Columbia University, Psychiatry; New York State Psychiatric Institute, Clinical Therapeutics<br>Berlin, Ivan; Hôpital Pitié-Salpêtrière-Université P&M Curie, Faculté de médecine, Pharmacology<br>Hu, Mei-Chen; Columbia University Medical Center, Psychiatry<br>Hakes, Jahn; U.S. Bureau of Census, |
| <b>Primary Subject Heading</b>: | Smoking and tobacco                                                                                                                                                                                                                                                                                                  |
| Secondary Subject Heading:      | Addiction                                                                                                                                                                                                                                                                                                            |
| Keywords:                       | Suicide & self-harm < PSYCHIATRY, Adult psychiatry < PSYCHIATRY, EPIDEMIOLOGY                                                                                                                                                                                                                                        |
|                                 |                                                                                                                                                                                                                                                                                                                      |

SCHOLARONE™  
Manuscripts

1  
2  
3  
4  
5  
6 **Smoking and suicidal behaviors in a sample of US adults with low mood:**  
7  
8  
9 **a longitudinal analysis**  
10

11 **Lirio S. Covey<sup>a</sup>, Ivan Berlin<sup>b</sup>, Mei-Chen Hu<sup>c</sup>, Jahn K. Hakes<sup>d</sup>**  
12

- 13  
14  
15  
16  
17 a) New York State Psychiatric Institute, Department of Psychiatry, Columbia University,  
18 1051 Riverside Drive, New York, NY 10032, United States  
19  
20  
21 b) Département de Pharmacologie, Hôpital Pitié-Salpêtrière-Assistance publique-Hôpitaux  
22 de Paris-Faculté de médecine, Université P.& M. Curie - INSERM U894, 47,bd de  
23 l'Hôpital, 75013 Paris, France  
24  
25  
26  
27 c) Department of Psychiatry, Columbia University Medical Center, 1051 Riverside Drive,  
28 New York, NY 10032, United States  
29  
30  
31  
32 d) Center for Administrative Records Research and Applications, U.S. Census Bureau, 4700  
33 Silver Hill Rd., Suitland, MD 20746, United States  
34  
35  
36  
37  
38  
39  
40  
41  
42  
43  
44  
45  
46

47 Corresponding author: Lirio S. Covey, New York State Psychiatric Institute, Department of  
48 Psychiatry, Columbia University, 1051 Riverside Drive, New York, NY 10032, United States. E-  
49 mail: lsc3@columbia.edu  
50  
51  
52  
53  
54  
55  
56  
57  
58  
59  
60

## ABSTRACT

**Objective:** To investigate whether: 1) smoking predicts suicide related outcomes (SRO); 2) prior SRO predicts smoking, 3) smoking abstinence affects the risk of SRO, 4) psychiatric comorbidity modifies the relationship between smoking and SRO.

**Design:** Longitudinal data obtained in Wave 1 (2001-2002) and Wave 2 (2004-2005) of the National Epidemiologic Survey of Alcohol and Related Conditions.

**Setting:** Face-to-face interviews conducted with persons in the community.

**Participants:** US adults (N=43,093) aged 18 years or older, interviewed in Wave 1 and re-interviewed (N=34,653) three years later. For the present study, the sample was the subset of persons (N=7,352) who at the Wave 2 interview reported low mood lasting two weeks or more during the past three years and were further queried regarding SRO occurring between Waves 1 and 2.

**Outcome measures:** SRO composed of any of: 1) want to die, 2) suicidal ideation, 3) suicide attempt, reported at Wave 2. Current smoking reported at Wave 2.

**Results:** Current and former smoking in Wave 1 predicted increased risk for Wave 2 SRO independently of prior SRO, psychiatric history, and socio-demographic characteristics measured in Wave 1 (Adjusted Odds Ratio (AOR) =1.41, 95% CI=1.28 to 1.55 for current smoking; AOR=1.32, 95% CI=1.21 to 1.43 for former smoking). Prior SRO did not predict current smoking in Wave 2. Compared with persistent never smokers, risk for future SRO was highest among relapsers (AOR=3.42, 95% CI=2.85 to 4.11); next highest among smoking beginners at Wave 2 (AOR=1.82, 95% CI=1.51 to 2.19); and lowest among long-term (four+ years) former smokers (AOR=1.22, 95% CI=1.12 to 1.34). Compared with persistent current

1  
2  
3 smokers, risk for SRO was lower among long-term ( $p < 0.0001$ ), but not shorter-term ( $p = 0.26$ )  
4  
5 abstinence.  
6

7  
8 **Conclusion:** Smoking increased the risk of future SRO independently of psychiatric  
9  
10 comorbidity. Abstinence of several years duration reduced that risk.  
11

12 **Word count= 294**  
13  
14  
15  
16  
17  
18  
19  
20  
21  
22  
23  
24  
25  
26  
27  
28  
29  
30  
31  
32  
33  
34  
35  
36  
37  
38  
39  
40  
41  
42  
43  
44  
45  
46  
47  
48  
49  
50  
51  
52  
53  
54  
55  
56  
57  
58  
59  
60

For peer review only

## Article Summary

### Article focus

To investigate longitudinally among persons reporting low mood lasting two weeks or more during the past three years whether:

- smoking predicts suicide related outcomes (want to die, suicidal ideation, suicide attempt); prior suicide related outcomes predict smoking,
- smoking abstinence affects the risk of suicide related outcomes,
- psychiatric comorbidity modifies the relationship between smoking and suicide related outcomes.

### Key messages

- Current and former smoking (less than 4 years' reported abstinence) predicted increased risk for suicide related outcomes independently of prior suicide related outcomes, psychiatric history, and socio-demographic characteristics.
- Prior suicide related outcomes did not predict future current smoking.
- Compared with persistent current smokers, risk of suicide related outcomes was reduced with long-term ( $\geq 4$  years) but not with shorter-term ( $< 4$  years) abstinence.

### Strengths and limitations

#### *Strengths*

- Face-to-face interviews, a longitudinal design, a large sample, a validated diagnostic instrument, a comprehensive range of putative predictors that permitted statistical control of the key background factors and comorbidities.

#### *Limitations*



- Only persons with self-reported low mood were questioned about suicide related outcomes, consequently, no generalizability to other populations.
- The sample did not include persons who had completed suicide.
- No assessment of the effects of medical conditions which are possibly causally related to smoking and to suicide related outcomes.
- No information from adolescents, a high risk population for both smoking and suicide related outcomes.

## INTRODUCTION

Suicide is a leading cause of death worldwide. Close to one million persons die from suicide each year. The World Health Organization predicts that by 2020 suicide deaths will rise to 1.5 million (1). Completed suicides are largely predicted by the wish to die, thoughts of suicide, and unsuccessful previous suicidal attempts (2), making it important to understand the risks posed by suicide related outcomes (SRO). A history of mental disorders (3-5) and particular demographic characteristics (female gender, younger age, unmarried status, and unemployment) are putative risk factors for suicide and SRO (2). Smoking, long known as a major risk factor for numerous medical illnesses (6), and recently, for psychiatric outcomes as well (7, 8) has received increasing attention for its potential contribution to the risk of completed suicides and SRO (9). Nevertheless, whether the association between smoking and suicidal behaviours is causal or correlational remains unclear.

A link between smoking and suicide was observed as early as 1976 by Doll and Peto in their study of mortality due to smoking in male British doctors (10). Clinical and epidemiological studies that subsequently investigated the issue are in general, but not universal, agreement in finding a significant association between smoking and suicide and suicidal behaviors. Among studies that focused on SRO, three that used cross-sectional epidemiological data found a positive correlational association between smoking and SRO (11-13). Of seven longitudinal studies that also utilized community based data, three (14-16) found that current smoking predicted suicidal behaviors even after controlling for the effects of demographic and psychiatric variables; four studies did not find a positive relationship (17-20).

The effect of smoking abstinence on risk of SRO is also unclear. A study of young adults followed for 10 years found that recent, but not pre-survey, cigarette smoking predicted suicidal

1  
2  
3 thoughts and attempts (14). Another study showed higher incidence rates of suicidal ideation  
4  
5 among former smokers than never smokers (16), but the difference was no longer significant  
6  
7 after adjustment with depressive disorder, anxiety symptoms, and alcohol dependence. A study  
8  
9 based on Wave 1 data from the National Epidemiological Survey of Alcohol and Related  
10  
11 Conditions (NESARC) initially found that longer duration of abstinence decreased risk for SRO,  
12  
13 but this effect disappeared upon controlling for psychiatric comorbidity (21).  
14  
15

16  
17 A further question of theoretical and practical importance is whether prior SRO increases  
18  
19 the risk of future smoking. In the single study that has addressed this question, longitudinal data  
20  
21 obtained from adolescents showed that smoking predicted suicidal ideation and suicide attempts  
22  
23 but prior suicidality was not associated with subsequent smoking (15).  
24  
25

26  
27 The present study was conducted to address these conundrums of the smoking-suicide  
28  
29 relationship: 1) whether prior smoking predicts SRO; 2) whether prior SRO predicts smoking; 3)  
30  
31 whether smoking cessation and its corollary, duration of smoking abstinence, affects risk for  
32  
33 SRO, and 4) whether these relationships are independent of comorbid psychiatric illness. Also  
34  
35 explored were the effects of smoking status changes between the two waves of the NESARC on  
36  
37 risk of future SRO. The two-wave format, the large sample, and extensive data on psychiatric  
38  
39 comorbidity that characterized the NESARC (22) permitted assessment of these questions.  
40  
41

42  
43 The survey instrument had asked questions regarding the past occurrence of SRO – want  
44  
45 to die, suicidal ideation, and suicide attempt, only of persons reporting low mood. This  
46  
47 restriction limits the generalizability of findings to the general population, but the much higher  
48  
49 occurrence of suicidal behaviours among persons with low mood (3, 4) provided a more  
50  
51 sensitive context for detecting the risk potential of smoking for suicidal behaviours (23).  
52  
53  
54  
55  
56  
57  
58  
59  
60

## METHODS

Sample: The NESARC data were collected to obtain a representative national sample of US adults. In Wave 1 (2001-2002), face-to-face interviews were completed with 43,093 persons aged 18 years or older. The overall response rate was 81.0%. The Wave 1 sample was re-interviewed in Wave 2 (2004-2005) three years later (mean interval=36.6 months, s.e.=2.62) with a response rate of 80.4% (N=34,653) based on the Wave 1 sample. The NESARC sample size was chosen to be sufficiently large to produce nationally representative proportions for the study of substance abuse and dependence and mental disorders by demographic group with confidence intervals equal to or smaller than extant studies. The NESARC study used a complex survey design and sampling weights upon responses to adjust for sample selection procedures, non-response from selected households or individuals, oversampling (of young adults, Blacks, and Hispanics), and non-response at the Wave 2 time point. The weights and survey design effects have been incorporated into the following results. Other methodological details of the NESARC have been described in published NESARC Source and Accuracy Statements (24, 25).

Data for the present study were obtained from a subset of persons (N=7,352) who reported low mood at the Wave 2 interview. The latter subsample is referred to herein and in the table as the “at-risk sample”. Persons who did not report low mood were skipped out of the SRO sections in Waves 1 and 2. The questions for low mood at the Wave 2 interview were: “Since your LAST interview in (month/year), have you ever had a time when you felt sad, blue, depressed, or down most of the time for at least 2 weeks?” and “Since your LAST interview, have you ever had a time, lasting at least 2 weeks, when you didn’t care about the things that you usually cared about, or when you didn’t enjoy the things you usually enjoyed?” At the Wave 1 interview, respondents were asked these same questions referenced to their *entire lifetime*.

1  
2  
3 Variables: The outcome variables for this study were Wave 2 SRO and Wave 2 current  
4 smoking. The main covariates were prior SRO and smoking status at Wave 1. The individual  
5 SRO questions are: “During that time when (your mood was at its [sic] lowest/you enjoyed or  
6 cared the least about things), did you ... feel like you wanted to die? think about committing  
7 suicide? attempt suicide?” Responses to these items were summed to create the total SRO  
8 question and measured as a dichotomous variable (none of the three=0; any of the three=1).  
9 Respondents who did not report low mood in Wave 1 and were not asked the SRO questions  
10 were assigned a value of 0 for prior SRO.  
11  
12  
13  
14  
15  
16  
17  
18  
19  
20  
21

22 The questions on tobacco use at Wave 1 are: “In your ENTIRE LIFE, have you ever . . .  
23 (a) Smoked at least 100 cigarettes? (b) Smoked at least 50 cigars? (c) Smoked a pipe at least 50  
24 times? (d) Used snuff, such as Skoal, Skoal Bandit [sic] or Copenhagen at least 20 times? (e)  
25 Used chewing tobacco, such as Redman, Levi Garrett or Beechnut at least 20 times?” Persons  
26 who smoked cigarettes, cigars and/or pipes, comprised (a weighted) 95.9% (3368/3497) of all  
27 tobacco users. Following the coding rule of the NESARC, all tobacco users, including the 129  
28 persons who reported using snuff or chewing tobacco only, were labelled as “smokers”. A *never*  
29 *smoker* had responded “No” to each of the questions regarding lifetime use of at least 100  
30 cigarettes, at least 50 cigars, smoked a pipe at least 50 times, used snuff at least 20 times, and  
31 used chewing tobacco at least 20 times. A *former smoker* was a “Yes” responder to at least one  
32 of the prior questions who also reported that he or she had not smoked or used tobacco in the  
33 past 12 months. (N.B. Very few, if any, of this latter group would have been experiencing  
34 withdrawal; thus, the current study is not an adequate test of post-cessation withdrawal as a  
35 predictor of SRO). A *current smoker* was a “Yes” respondent who had smoked or used tobacco  
36  
37  
38  
39  
40  
41  
42  
43  
44  
45  
46  
47  
48  
49  
50  
51  
52  
53  
54  
55  
56  
57  
58  
59  
60

1  
2  
3 within the past 12 months. At the Wave 2 interview, these same questions on tobacco use were  
4  
5 asked with regard to the period since the last interview (month/year).  
6  
7

8 The smoking status variable (i.e., never, former, current) rather than DSM-IV defined  
9  
10 nicotine dependence was selected to assess tobacco use because: 1) the adequacy of the DSM-IV  
11  
12 criteria as a valid measure of nicotine dependence remains controversial (26, 27), and 2)  
13  
14 response to the single question on smoking status is easier to elicit in the clinical setting, with  
15  
16 more validity, than responses to a multi-item measure of tobacco use for which no consensus,  
17  
18 stand-alone, instrument yet exists (26, 27). To categorize long-term or recent status as never,  
19  
20 former, or current smokers, a change variable was created with the following categories  
21  
22 according to their report of smoking at Waves 1 and 2: 1) never smoker to never smoker, 2)  
23  
24 former smoker to former smoker, 3) current smoker to former smoker, 4) current smoker to  
25  
26 current smoker, 5) never smoker to current smoker, 6) former smoker to current smoker, and 7)  
27  
28 never smoker to former smoker.  
29  
30  
31  
32  
33

34 Other potential confounders or effect modifiers because of their known correlations with  
35  
36 smoking and/or SRO, measured at Wave 1, were: demographic characteristics (age, gender,  
37  
38 race/ethnicity, marital status, education, employment status, income, urban residence, geographic  
39  
40 region), and lifetime measures of DSM-IV Axis I and Axis II disorders. The Axis I disorders  
41  
42 were categorized into mood disorders (major depression, dysthymia, bipolar I and bipolar II),  
43  
44 anxiety disorders (panic disorder, social phobia, specific phobia, generalized anxiety), alcohol  
45  
46 use disorders (alcohol abuse or dependence), and other substance use disorders (drug abuse or  
47  
48 dependence). A history of Attention Deficit Hyperactivity Disorder (ADHD), queried only at  
49  
50 Wave 2, was used among the Wave 1 predictors, its lifetime quality presumed since the DSM-IV  
51  
52 criteria for ADHD include the presence of ADHD symptoms before age seven. All ten of the  
53  
54  
55  
56  
57  
58  
59  
60

1  
2  
3 Axis II personality disorders measured in AUDADIS-IV (shown in Table 1) were included as  
4  
5 well.  
6  
7

8           Assessment: For both Waves 1 and 2, the Alcohol Use Disorder and Associated  
9  
10 Disabilities Interview Schedule (AUDADIS-IV) was administered by interviewers from the U.S.  
11  
12 Census Bureau. The reliability and validity of the DSM-IV diagnoses obtained through the  
13  
14 AUDADIS-IV have been demonstrated in clinical and general samples in the U.S. and in other  
15  
16 countries (28).  
17  
18

19           Statistical Analysis: Weighted percentages and standard errors measured the distribution  
20  
21 of the covariates (demographic characteristics and lifetime psychiatric variables) reported at  
22  
23 Wave 1 for the sample with low mood and for the complementary sample of persons with no low  
24  
25 mood. Chi-squared tests were used to assess differences between comparison groups, e.g., the at-  
26  
27 risk sample and the complementary sample of NESARC participants who did not report low  
28  
29 mood. Unadjusted and adjusted odds ratios (OR and AOR) and 95% confidence intervals (CI)  
30  
31 were calculated from univariate logistic regressions and multivariate logistic regressions,  
32  
33 respectively, to assess prediction of Wave 2 SRO in the sample of persons reporting low mood.  
34  
35 respectively. The prevalence rates of SRO at Wave 2 by Wave 1 smoking status, prior SRO at  
36  
37 Wave 1, and by all other covariates at Wave 1 were also calculated. The opposite temporal  
38  
39 relationship of prior SRO (reported in Wave 1) on future smoking (reported in  
40  
41 Wave 2) was tested using the identical covariates for assessing predictors of Wave 2 SRO,  
42  
43 following Granger (29). All models were estimated with the PROC SURVEYLOGISTIC  
44  
45 function of SAS statistical software version 9.2, with the results verified through an internal  
46  
47 statistical review at the U.S. Census Bureau.  
48  
49  
50  
51  
52  
53  
54  
55  
56  
57  
58  
59  
60

1  
2  
3  
4  
5  
6  
7  
8  
9  
10  
11  
12  
13  
14  
15  
16  
17  
18  
19  
20  
21  
22  
23  
24  
25  
26  
27  
28  
29  
30  
31  
32  
33  
34  
35  
36  
37  
38  
39  
40  
41  
42  
43  
44  
45  
46  
47  
48  
49  
50  
51  
52  
53  
54  
55  
56  
57  
58  
59  
60

Missing values were replaced through imputation using assignment and allocation methods (24, 25). Sensitivity analyses were performed that included: comparison of the at-risk subsample to the complementary Wave 2 NESARC sample; using different sets of control variables with and without education, Axis II personality disorders, and census region; and including help-seeking behavior controls. These analyses did not change the associations between smoking and SRO reported below.

## RESULTS

### *Wave 1 Characteristics*

Table 1 shows weighted percentages by smoking status, SRO taken together and individually, demographic characteristics, and psychiatric disorders (DSM-IV Axis I and Axis II) in the sample of persons reporting low mood at Wave 1 and the rest of the NESARC sample. Current smoking, SRO, and the prevalence of psychiatric disorders were markedly higher among the low mood sample, confirming their at-risk status. Other demographic characteristics previously associated with higher risk of suicide and SROs were also higher in the low mood subsample: more females, more low and fewer high income responders, fewer married, and more separated or never married, and more unemployed individuals. Differences by race/ethnicity, age, urban or rural residence, and geographic area were also observed.

### *Effects of Wave 1 characteristics on Wave 2 SRO*

From here on, reported statistics are for the sample of persons reporting low mood at Wave 2. The overall incidence rate of SRO (occurring between the Wave 1 and Wave 2 interviews) was 28.2% (s.e.=0.33%). Table 2 shows weighted percentages and odds ratios for Wave 2 SRO by smoking history, prior SRO, and the control variables as reported in Wave 1.



1  
2  
3 Unadjusted odds ratios (OR) and 95% CI for future SRO are shown as reference points. The  
4  
5 adjusted odds ratios (AOR) and 95% CI show significantly higher risk of Wave 2 SRO for both  
6  
7  
8 Wave 1 current smokers (AOR=1.41, 95% CI= 1.28, 1.55) and former smokers (AOR=1.32,  
9  
10 95% CI=1.21, 1.43) relative to never smokers. The difference in point estimates of risk between  
11  
12 current versus former smokers was not significant ( $\chi^2=1.95$ ,  $p = 0.16$ ).  
13  
14

15 The multivariate model showed that SRO in Wave 1 is the strongest predictor of a Wave  
16  
17 2 SRO (AOR=3.49, 95% CI= 3.18, 3.84). Significant, independent risk of future SRO was also  
18  
19 observed for individuals who were female, Hispanic, younger, cohabiting, divorced or separated,  
20  
21 of lower income, unemployed, and resided outside the Northeast region. Of the DSM-IV Axis I  
22  
23 disorders, only anxiety (AOR= 1.08, 95% CI=1.01, 1.17) and ADHD (AOR=1.56, 95% CI=1.36,  
24  
25 1.79) showed significantly elevated risk of Wave 2 SRO; mood disorder was correlated with  
26  
27 reduced Wave 2 SRO risk (AOR=0.77; 95% CI=0.70, 0.84). Three of the DSM-IV Axis II  
28  
29 disorders, i.e., borderline personality, schizotypal, and avoidant personality, showed significantly  
30  
31 increased risk for Wave 2 SRO.  
32  
33  
34  
35  
36  
37  
38

#### 39 *Smoking status change from Wave 1 to Wave 2*

40  
41 The great majority of the sample (90.5%) did not change their smoking status as never,  
42  
43 former, or current smoker, between Waves 1 and 2 (Table 3). Among the remaining 9.5%, over  
44  
45 half (5.3%) had shifted from being current smokers to former smokers; more than a fourth  
46  
47 (2.6%) were never smokers in Wave 1 who became current smokers in Wave 2; and a smaller  
48  
49 proportion (<2%) who were former smokers in Wave 1 relapsed to smoking in Wave 2.  
50  
51  
52

53 a) *Effects on Wave 2 SRO.* Table 3 shows adjusted odds ratios indicating significant  
54  
55 risk for SRO among all categories of ever-smokers relative to the persistent never smokers. The  
56  
57  
58  
59  
60

1  
2  
3 highest risk was seen for relapsers (former smoker to current smoker) (AOR=3.42, 95%  
4 CI=2.85, 4.11); new smokers (never smoker to current smoker) showed the next highest risk  
5  
6 (AOR=1.82, 95% CI=1.51, 2.19); and long-term former smokers (during both Wave 1 and 2 )  
7  
8 showed the least elevated, yet still significant, risk (AOR=1.22, 95% CI=1.12, 1.34). The  
9  
10 seventh category consisting of never smokers in Wave 1 who reported former smoker status in  
11  
12 Wave 2 was too small for a valid analysis.  
13  
14  
15  
16

17 b) *Comparative risks by abstinence duration, relapse, and new smoking.* Pair-wise  
18  
19 chi-squared tests for equality of coefficients permitted a comparison of risk estimates for Wave  
20  
21 2 SRO (shown in Table 3) between categories of smoking status change. Given the three-year  
22  
23 interval between Waves 1 and 2 and the coding requirement that former smoking status is  
24  
25 assigned only upon reporting of at least 12 months of abstinence, long-term former smokers  
26  
27 (Category 2, Table 3) would have been abstinent for at least four years. Persons who shifted  
28  
29 from current smoking in Wave 1 to former smoking in Wave 2 (Category 3, Table 3) would  
30  
31 have been abstinent for at least 12 months and a maximum of four years.  
32  
33  
34  
35

36 The analysis showed that the AOR for Wave 2 SRO among recent former smokers  
37  
38 (Category 3) did not differ from persistent current smokers (Category 4) ( $\chi^2(1) = 1.26, p=0.26$ ).  
39  
40 However, long-term former smokers (Category 2) showed a significantly lower AOR for Wave 2  
41  
42 SRO than persistent current smokers ( $\chi^2(1) = 16.9, p<0.0001$ ). These data suggest that a  
43  
44 reduction in risk for future SRO with past smoking becomes apparent after a considerable period  
45  
46 of abstinence. Of additional interest were the risk estimates associated with re-starting (i.e.  
47  
48 relapse) and with beginning to smoke in Wave 2. Compared to persistent current smokers, the  
49  
50 AOR for Wave 2 SRO was significantly higher for both relapsers ( $\chi^2(1) = 56.00, p<0.0001$ ), and  
51  
52  
53  
54  
55  
56  
57  
58  
59  
60

1  
2  
3 smoking beginners in Wave 2 ( $\chi^2(1) = 4.11, p = 0.04$ ). Further, the AOR for Wave 2 SRO was  
4  
5 significantly higher among relapsers than beginning smokers ( $\chi^2(1) = 19.0, p < 0.0001$ ).  
6  
7  
8  
9

### 10 *Does prior SRO predict smoking?*

11  
12 A multiple regression model on current smoking in Wave 2 was fit using the identical list  
13  
14 of control variables for predicting Wave 2 SRO. This second model did not show a direct effect  
15  
16 of prior SRO on Wave 2 current smoking. Persons with Wave 1 SROs were *less* likely to report  
17  
18 current smoking status at Wave 2 than were persons who did not experience SRO in Wave 1  
19  
20 (AOR=0.81, 95% CI=0.72, 0.90).  
21  
22  
23

24  
25 To understand the temporal relationship between smoking and SRO, the effects of the  
26  
27 interaction of Wave 1 smoking status (current vs. never smoker and former vs. never smoker)  
28  
29 with history of prior SRO were examined. Table 4 shows adjusted odds ratios from separate  
30  
31 multiple regression models on SRO and on current smoking in Wave 2 for combined effects of  
32  
33 smoking status and prior SRO reported in Wave 1. Never smokers without a prior SRO at Wave  
34  
35 1 were the reference group in each model. These analyses did not fundamentally change the  
36  
37 finding that smoking predicts increased risk of SRO and that the reverse relationship does not  
38  
39 hold, but indicates nuanced impact of both SRO and smoking history.  
40  
41  
42

43  
44 The model on Wave 2 SRO (Table 4 section a) shows that, other characteristics (e.g.,  
45  
46 demographics and psychopathology) being equal: a) all combinations of smoking status and SRO  
47  
48 history had statistically significant risks for Wave 2 SRO relative to never smokers without prior  
49  
50 SRO; and b) for each smoking category, the risks were considerably greater when the combined  
51  
52 group involved a prior SRO. The data also show that former smoking and current smoking, in  
53  
54 the absence of prior SRO, are valid predictors of an *initial* SRO. However, once a person has had  
55  
56  
57  
58  
59  
60

1  
2  
3 a SRO, smoking status history does not change the risk prediction - the risk of *recurrence* is fully  
4 predicted by that prior SRO and the other characteristics. The second model, on Wave 2 current  
5 smoking (Table 4 section b), shows an expectedly substantial likelihood of being a current  
6 smoker in Wave 2 for current smokers in Wave 1, regardless of SRO history. By contrast, prior  
7 SRO predicted a *reduction* in the likelihood of smoking uptake in Wave 2 for former smokers  
8 and never smokers.  
9  
10  
11  
12  
13  
14  
15  
16  
17  
18  
19

## 20 DISCUSSION

21  
22 The main findings from the present sample of persons reporting low mood are: 1) current  
23 and past smoking predicted increased risk for SRO independently of demographics, psychiatric  
24 factors, and prior SRO; 2) long-term smoking abstinence was associated with lower risk than  
25 persistent smoking; 3) new smoking due to relapse after a period of abstinence or to initiation of  
26 smoking by erstwhile never smokers was associated with an increased risk of SRO relative to  
27 persistent smoking; 4) prior SRO did not increase the risk of future smoking.  
28  
29  
30  
31  
32  
33  
34  
35

36 For three Axis I disorders, i.e., mood, alcohol use, and substance use, the adjusted odds  
37 ratios indicated either insignificant effects or a decreased risk of future SRO. These results differ  
38 from the increased risks yielded in the unadjusted analyses, indicating confounding effects of  
39 correlated predictors of SRO, for example, prior SRO and comorbid psychiatric disorders (3-5).  
40 In further analysis excluding prior SRO in the multivariate regression model, a positive,  
41 predictive effect of mood disorder on future SRO (AOR=2.05, 95% CI=1.92,2.17) was observed,  
42 contrary to the reduced effect of mood disorder in the full model that adjusted for prior SRO  
43 (results available upon request). This finding exemplifies an instance when collinearity with a  
44 stronger predictor (e.g., Wave 1 SRO) overwhelmed the explanatory power of other predictors  
45  
46  
47  
48  
49  
50  
51  
52  
53  
54  
55  
56  
57  
58  
59  
60

1  
2  
3 with weaker relationships. It is thus remarkable that significant effects of smoking on risk of  
4  
5 SRO remained despite the evidence of effect suppression due to confounding. Ranked in  
6  
7 decreasing order, the significant predictors of SRO risk in the present sample were: prior SRO,  
8  
9 borderline personality disorder, ADHD, schizotypal disorder, current smoking, former smoking,  
10  
11 avoidant personality disorder, and selected demographic characteristics.  
12  
13  
14

15 Other than the present one, there have been seven longitudinal epidemiological studies of  
16  
17 smoking and SRO (14-20). The positive effect of current smoking on future SRO reported here  
18  
19 was also observed in three studies (14-16). Problems of recall due to the long, ten year, interval  
20  
21 between data time points could explain the negative finding of the study by Kessler et al (17);  
22  
23 while the younger age of the samples in two studies (19-20) could have masked a future effect.  
24  
25 Of clinical and public health importance is the finding, first reported here, that longer abstinence  
26  
27 from smoking decreased the risk for SRO. The latter observation, not considered in two negative  
28  
29 studies regarding past smoking (14, 16), could account for the inconsistent findings. Notably,  
30  
31 the divergence according to longevity of abstinence is consistent with evidence for lung cancer  
32  
33 and other smoking-related disorders that risk reduction from stopping smoking occurs only after  
34  
35 multiple years of abstinence (31, 32). The worrisome observation that relapsers and new  
36  
37 smokers are at even higher risk of future SRO than persistent smokers suggests particular targets  
38  
39 for increased therapeutic attention. Finally, the data negated a reverse temporal relationship of  
40  
41 SRO on smoking, as also seen in a study of adolescents (15). Instead, a reduction in risk for  
42  
43 future smoking was observed among former and never smokers with prior SRO in Wave 1  
44  
45 compared to their counterparts without prior SRO. Perhaps among those former and never  
46  
47 smokers, already inclined towards the pro-health behaviour of not currently smoking, was a  
48  
49 subset spurred by the prior SRO to undertake further health-promoting and therapeutic actions,  
50  
51  
52  
53  
54  
55  
56  
57  
58  
59  
60

1  
2  
3 which immunized them against future smoking. Their counterparts who did not experience a  
4  
5 prior SRO were less likely to be as self-protective or to seek counselling and similar treatments,  
6  
7 and were less immunized against resorting to new smoking. The serendipitous observation from  
8  
9 the present sample that prior SRO and treatment seeking were well-correlated ( $r=0.43$ ,  $p=0.0001$ )  
10  
11 is consistent with that conjecture.  
12  
13

14  
15 Strengths and limitations of the study are noted. An important strength is the  
16  
17 concomitance of rigorous methods and materials not found in prior work on the smoking-suicide  
18  
19 question – face-to-face interviews, a longitudinal design, a large sample, a validated instrument,  
20  
21 and a comprehensive range of putative predictors that permitted statistical control of the key  
22  
23 background factors and comorbidities. A further strength is the use of a simple yet meaningful  
24  
25 measure of smoking status (i.e., never, former or current smoking), that is easy for a questioner  
26  
27 to administer and for the respondent to recall and understand. Even so, study limitations call for  
28  
29 cautious interpretation of the findings. The present sample comprised the subgroup (22%) of  
30  
31 Wave 2 participants ( $N=34,653$ ) who self-reported low mood during the three-year interval  
32  
33 between the interviews. This selectivity yields findings relevant to mental health settings that are  
34  
35 likely to serve persons experiencing mood problems; however, they may not generalize to the  
36  
37 rest of the NESARC sample or to the national population. Second, the sample did not include  
38  
39 persons who had completed suicide attempts. Using the U.S. rate of 11.1 per 100,000 population  
40  
41 per year (30), the Wave 1 sample of 43,093 could be expected to include about 14 persons with  
42  
43 completed suicides before Wave 2 (95% CI= 6.8, 21.6), introducing a non-trivial, although likely  
44  
45 small, selection bias. Third, the present study did not assess the effects of medical conditions  
46  
47 which are possibly causally related, albeit in different directions, to smoking and to SRO. Fourth,  
48  
49 the NESARC did not obtain information from adolescents, a subgroup with a known high risk  
50  
51  
52  
53  
54  
55  
56  
57  
58  
59  
60

1  
2  
3 for SRO (2). Finally, in exploratory, unadjusted, analyses, predictive effects of current smoking  
4  
5 were observed across the individual SRO whereas past smoking predicted want to die and  
6  
7 suicidal ideation, but not suicide attempt. Validation and articulation of these preliminary  
8  
9 observations need to be accomplished in future work.  
10  
11

12  
13 The rigorous methodology employed in the NESARC gives eminent credence to the  
14  
15 central findings of this analysis - an independent effect of smoking on SRO and the absence of a  
16  
17 positive influence of prior SRO on future smoking. These results are consistent with the  
18  
19 hypothesis that smoking exerts a contributing, and not simply a correlational, effect on risk of  
20  
21 SRO. By contrast, these results are inconsistent with the hypothesis that SRO causes smoking or  
22  
23 that a third factor causes both smoking and SRO. The neurobiological, genetic, psychiatric and  
24  
25 psychological underpinnings of these associations warrant further investigation. The knowledge  
26  
27 gained could advance prevention and treatment options for reducing the prevalence of tobacco  
28  
29 use and suicide.  
30  
31  
32  
33  
34  
35  
36  
37  
38  
39  
40

41 **Manuscript word count= 4,136**  
42  
43  
44  
45  
46  
47  
48  
49  
50  
51  
52  
53  
54  
55  
56  
57  
58  
59  
60

1  
2  
3 Copyright. The Corresponding Author has the right to grant on behalf of all authors and does  
4 grant on behalf of all authors, [a worldwide license](#) to the Publishers and its licensees in  
5  
6  
7  
8  
9  
10  
11  
12  
13  
14  
15  
16  
17  
18  
19  
20  
21  
22  
23  
24  
25  
26  
27  
28  
29  
30  
31  
32  
33  
34  
35  
36  
37  
38  
39  
40  
41  
42  
43  
44  
45  
46  
47  
48  
49  
50  
51  
52  
53  
54  
55  
56  
57  
58  
59  
60

Copyright. The Corresponding Author has the right to grant on behalf of all authors and does grant on behalf of all authors, [a worldwide license](#) to the Publishers and its licensees in perpetuity, in all forms, formats and media (whether known now or created in the future), to i) publish, reproduce, distribute, display and store the Contribution, ii) translate the Contribution into other languages, create adaptations, reprints, include within collections and create summaries, extracts and/or, abstracts of the Contribution, iii) create any other derivative work(s) based on the Contribution, iv) to exploit all subsidiary rights in the Contribution, v) the inclusion of electronic links from the Contribution to third party material where-ever it may be located; and, vi) license any third party to do any or all of the above.

The National Epidemiologic Survey on Alcohol and Related Conditions was sponsored by the National Institute on Alcohol Abuse and Alcoholism (NIAAA) and funded in part by the Intramural Program, NIAAA, National Institutes of Health, with additional support from the National Institute on Drug Abuse. No funding was obtained for this secondary analysis.

All authors have completed the Unified Competing Interest form ([www.icmje.org/doi\\_disclosure.pdf](http://www.icmje.org/doi_disclosure.pdf). 1) JH received support from NIAAA through the US Census Bureau for the submitted work; 2) LC, IB, and MH received no specific support for this work; 3) IB received occasional honoraria for participating in advisory panels of Pfizer Ltd during the last 3 years; 4) in February 2011, LC provided educational consultation to a law firm regarding mood effects of smoking cessation; 4) JH and MH had no relationships with any company that might have an interest in the submitted work in the previous 3 years; 5) none of the



1  
2  
3 spouses of the authors had financial relationships that may be relevant to the submitted work; 6)  
4  
5 none of the authors had a non-financial interest that may be relevant to the submitted work.  
6  
7

8  
9 Lirio Covey and Ivan Berlin conceptualized this study and, with Mei-Chen Hu, designed the  
10 analysis. Jahn Hakes had full access to all of the data in the study and takes responsibility for the  
11 integrity of the data and the accuracy of the data analysis. Lirio Covey was the lead writer of the  
12 manuscript. All authors participated in the interpretation of findings and writing of the  
13 manuscript. All authors had full access to the statistical reports, tables, and the manuscript; and  
14 take responsibility for the integrity of the data and the accuracy of the data analysis. The U.S.  
15 Census Bureau, NIAAA, and other employers of the authors had no role in the study design,  
16 implementation of the study, analysis and interpretation of data, in the writing of the report, and  
17 the decision to submit the article for publication.  
18  
19  
20  
21  
22  
23  
24  
25  
26  
27  
28  
29  
30  
31  
32

33 The authors thank the reviewers of this article for their helpful comments.  
34  
35

36 The study is a secondary analysis of data collected by the National Institute of Health-National  
37 Institute of Alcohol and Alcohol Abuse of the US government. Before data collection, each  
38 respondent was informed of the nature of the survey and its potential uses, ensured of  
39 confidentiality, and told that participation was voluntary. All participants signed a consent form  
40 prior to participating in the interviews. The US Census Bureau and the US Office of  
41 Management and Budget reviewed and approved the ethics protocol. Individual data files are  
42 de-identified to prevent full anonymity of participants. Approval for conducting this secondary  
43 analysis of previously collected data was not required.  
44  
45  
46  
47  
48  
49  
50  
51  
52  
53  
54  
55  
56  
57  
58  
59  
60

1  
2  
3 In order to safeguard sensitive personal information, NESARC data are not available for public  
4 use. The restricted use data sets are maintained by the U.S. Census Bureau on behalf of NIAAA,  
5  
6 and any requests to use NESARC data for replication or other purposes may be directed to the  
7  
8  
9  
10 NIAAA coordinator for NESARC, Aaron White ([white4@mail.nih.gov](mailto:white4@mail.nih.gov)).  
11  
12  
13  
14  
15  
16  
17  
18  
19  
20  
21  
22  
23  
24  
25  
26  
27  
28  
29  
30  
31  
32  
33  
34  
35  
36  
37  
38  
39  
40  
41  
42  
43  
44  
45  
46  
47  
48  
49  
50  
51  
52  
53  
54  
55  
56  
57  
58  
59  
60

For peer review only

## REFERENCES

1. World Health Organization. *Suicide prevention*. (2010) Retrieved from [http://www.who.int/mental\\_health/prevention/suicide/suicideprevent/en/accessed](http://www.who.int/mental_health/prevention/suicide/suicideprevent/en/accessed) .
2. Nock MK, Borges G, Bromet EJ, Cha CB, Kessler RC, Lee S. Suicide and suicidal behavior. *Epidemiol Rev*. 2008;30 (1):133-54.
3. Tidemalm D, Långström N, Lichtenstein P, Runeson B. Risk of suicide after suicide attempt according to coexisting psychiatric disorder: Swedish cohort study with long term follow-up. *BMJ*. 2008 Nov 18;337:a2205.
4. Harris EC, Barraclough B. Suicide as an outcome for mental disorders. A meta-analysis. *Br. J Psychiatry*, 1997; 170: 205-208.
5. Nock MK, Hwang I, Sampson NA, Kessler RC. Mental disorders, comorbidity and suicidal behavior: results from the National Comorbidity Survey Replication. *Mol Psychiatry*. 2010;15(8):868-76.
6. CDC - Health Effects - Smoking & Tobacco Use, [http://www.cdc.gov/tobacco/basic\\_information/health\\_effects/index.htm](http://www.cdc.gov/tobacco/basic_information/health_effects/index.htm)
7. John U, Meyer C, Rumpf HJ, Hapke U. Smoking, nicotine dependence and psychiatric comorbidity--a population-based study including smoking cessation after three years. *Drug Alcohol Depend*. 2004 ; 76(3):287-95.
8. Choi WS, Patten CA, Gillin JC, Kaplan RM, Pierce JP, Cigarette smoking predicts development of depressive symptoms among U.S. adolescents. *Ann Behav Med*; 1997 ;19 (1):42-50.
9. Hughes, J. R. Smoking and suicide: A brief overview. *Drug Alcohol Depend*. 2008; 98 (3), 169–178.
10. Doll R, Peto R. Mortality in relation to smoking, 20 years' observations on male British doctors. *BMJ*. 1976; 2 (6051): 1525-1536.
11. Bolton, JM, Robinson J. Population-attributable fractions of Axis I and Axis II mental disorders for suicide attempts; Findings from a representative sample of the adult, non-institutionalized US population. *Am J Public Health*, 2010; 100 (12): 2473-2480.
12. Scherrer JF, Grant JD, Agrawal A, Madden PA, Fu Q, Jacob T, Bucholz KK, Xian H. Suicidal Behavior, Smoking, and Familial Vulnerability. *Nicotine Tob Res*. 2012;14(4):415-424

13. Yaworski D, Robinson J, Sareen J, Bolton JM. The relation between nicotine dependence and suicide attempts in the general population. *Can J Psychiatry*. 2011 Mar;56(3):161-70.
14. Breslau N, Schultz LR, Johnson EO, Peterson EL, Davis GC. Smoking and the risk of suicidal behavior: a prospective study of a community sample. *Arch Gen Psychiatry*, 2005; 62 (3): 328-334.
15. Bronisch T, Höfler M, Lieb R. Smoking predicts suicidality: findings from a prospective community study. *J Affect Disord*. 2008;108(1-2):135-45
16. Clarke DE, Eaton WE, Petronis KR, Ko JY, Chatterjee A, Anthony JC. Increased risk of suicidal ideation in smokers and former smokers compared to never smokers: Evidence from the Baltimore ECA follow-up study. *Suicide Life Threat Behav*. 2010; 40 (4): 307-318.
17. Kessler RC, Borges G, Sampson N, Miller M, Nock MK. The association between smoking and subsequent suicide-related outcomes in the National Comorbidity Survey panel sample. *Molecular Psychiatry*. 2009; 14(12):1132-42.
18. Boden JM, Fergusson DM., Horwood LJ. Cigarette smoking and suicidal behaviour: results from a 25-year longitudinal study. *Psychol Med*. 2008; 38(3): 433-439.
19. McGee R, Williams S, Nada-Raja S. Is cigarette smoking associated with suicidal ideation among young people? *Am J Psychiatry*. 2005; 162(3):619-20.
20. Wilcox HC, Anthony JC. The development of suicidal ideation and attempts: an epidemiologic study of first graders followed into young adulthood. *Drug Alcohol Dependence* 2004; 76 (Suppl): S53-S67.
21. Berlin I, Covey LS, Donohue MC, Agostini V. Duration of smoking abstinence and suicide-related outcomes. *Nicotine Tob Res*. 2011;13(10):887-893.
22. Grant BF, Stinson FS, Dawson DA, Chou SP, Ruan WJ, Pickering RP. Co-occurrence of 12-month alcohol and drug use disorders and personality disorders in the United States: results from the National Epidemiologic Survey on Alcohol and Related Conditions. *Arch Gen Psychiatry*. 2004;61(4):361-8.
23. Nordentoft M. Prevention of suicide and attempted suicide in Denmark. Epidemiological studies of suicide and intervention studies in selected risk groups. *Dan Med Bull*. 2007; 54(4):306-69.
24. Grant BF, et al. Source and Accuracy Statement for Wave 1 of the 2001-2002 NESARC. National Institute on Alcohol Abuse and Alcoholism: Bethesda, MD; 2003. URL: <https://www.fbo.gov/utills/view?id=2f8b6b30ed2a57485da564b32f6e9e60>.

- 1  
2  
3  
4  
5  
6  
7  
8  
9  
10  
11  
12  
13  
14  
15  
16  
17  
18  
19  
20  
21  
22  
23  
24  
25  
26  
27  
28  
29  
30  
31  
32  
33  
34  
35  
36  
37  
38  
39  
40  
41  
42  
43  
44  
45  
46  
47  
48  
49  
50  
51  
52  
53  
54  
55  
56  
57  
58  
59  
60
25. Grant, B.F., and Kaplan, K.D. Source and Accuracy Statement for the 2004–2005 Wave 2 National Epidemiologic Survey on Alcohol and Related Conditions. Bethesda, MD; National Institute on Alcohol Abuse and Alcoholism, 2005. URL: <https://www.fbo.gov/utills/view?id=808b8e8cfcaa3c366c39c2ef643a40d5>.
  26. Hughes JR, Baker T, Breslau N, Covey L, Shiffman S. Applicability of DSM criteria to nicotine dependence. *Addiction*. 2011;106(5):894-5
  27. Mwenifumbo JC, Tyndale RF. DSM-IV, ICD-10 and FTND: Discordant Tobacco Dependence Diagnoses in Adult Smokers, *J Addict Res Ther*, 2011; 2:1
  28. Ruan WJ, Goldstein RB, Chou SP, Smith SM, Saha TD, Pickering RP, Dawson DA, Huang B, Stinson FS, Grant BF. The alcohol use disorder and associated disabilities interview schedule-IV (AUDADIS-IV): reliability of new psychiatric diagnostic modules and risk factors in a general population sample. *Drug Alcohol Depend*. 2008; 92(1-3):27-36.
  29. Granger CWJ. Investigating Causal Relations by Econometric Models and Cross-Spectral Methods. *Econometrica*. 1969; 37(3):424-438.
  30. National Institute of Mental Health, Suicide in the United States, Statistics and Prevention, NIH Publication No. 06-4594, pp 56-59 [www.nimh.gov](http://www.nimh.gov).
  31. Novello, AC. Surgeon General's report on the health benefits of smoking cessation. *Public Health Rep*. 1990; 105(6): 545–548.
  32. Cao, Y, Kenfield S, Song Y, Rosner B, Qiu W, Sesso HD, Gaziano JM. Cigarette Smoking Cessation and Total and Cause-Specific Mortality: A 22-Year Follow-up Study Among US Male Physicians. *Arch Intern Med* 2011; 171 (21), 1956-1958.

Table 1: Wave 1 characteristics of the low mood sample and the rest of the NESARC Wave 2 sample. Weighted percentages<sup>a</sup> (%) and standard error (s.e)

| Variable                                     | Total Wave 2 sample % | s.e. | Low mood Sample <sup>b</sup> % | s.e. | Rest of sample <sup>c</sup> % | s.e. |
|----------------------------------------------|-----------------------|------|--------------------------------|------|-------------------------------|------|
| Total n                                      | 34,653                |      | 7,352                          |      | 27,301                        |      |
| <b>Smoking status</b>                        |                       |      |                                |      |                               |      |
| Current smoker                               | 27.02                 | 0.17 | 31.65                          | 0.38 | 25.85                         | 0.19 |
| Former smoker                                | 19.58                 | 0.16 | 17.84                          | 0.28 | 20.02                         | 0.17 |
| Never smoker                                 | 53.40                 | 0.19 | 50.51                          | 0.42 | 54.13                         | 0.20 |
| <b>Wave 1 Suicide related outcomes (SRO)</b> |                       |      |                                |      |                               |      |
| Want to die                                  | 11.42                 | 0.10 | 25.55                          | 0.27 | 7.84                          | 0.10 |
| Suicidal ideation                            | 10.17                 | 0.10 | 23.35                          | 0.26 | 6.82                          | 0.10 |
| Suicide ideation                             | 8.42                  | 0.09 | 19.27                          | 0.27 | 5.66                          | 0.09 |
| Suicide attempt                              | 2.35                  | 0.04 | 6.09                           | 0.17 | 1.40                          | 0.04 |
| <b>Demographics</b>                          |                       |      |                                |      |                               |      |
| <b>Gender</b>                                |                       |      |                                |      |                               |      |
| Female                                       | 52.08                 | 0.16 | 64.13                          | 0.40 | 49.02                         | 0.17 |
| Male                                         | 47.92                 | 0.16 | 35.87                          | 0.40 | 50.98                         | 0.17 |
| <b>Race/Ethnicity</b>                        |                       |      |                                |      |                               |      |
| White                                        | 70.93                 | 0.24 | 71.39                          | 0.40 | 70.81                         | 0.25 |
| Black                                        | 10.75                 | 0.20 | 10.61                          | 0.22 | 10.79                         | 0.21 |
| Hispanic                                     | 11.56                 | 0.10 | 11.20                          | 0.15 | 11.65                         | 0.12 |
| Asian/Pac. Islander                          | 4.36                  | 0.06 | 3.50                           | 0.10 | 4.58                          | 0.06 |
| Amer. Indian/Alaska Native                   | 2.40                  | 0.11 | 3.29                           | 0.20 | 2.17                          | 0.11 |
| <b>Age:</b>                                  |                       |      |                                |      |                               |      |
| 18-19                                        | 4.02                  | 0.07 | 4.47                           | 0.15 | 3.91                          | 0.08 |
| 20-29                                        | 17.78                 | 0.14 | 19.28                          | 0.30 | 17.40                         | 0.15 |
| 30-44                                        | 30.90                 | 0.17 | 32.28                          | 0.29 | 30.54                         | 0.18 |
| 45-64                                        | 31.08                 | 0.15 | 31.64                          | 0.24 | 30.94                         | 0.17 |
| 65 and over                                  | 16.22                 | 0.10 | 12.32                          | 0.25 | 17.21                         | 0.12 |
| <b>Household Income:</b>                     |                       |      |                                |      |                               |      |
| Less than \$20,000                           | 20.35                 | 0.17 | 25.07                          | 0.32 | 19.15                         | 0.19 |
| \$20,000 to \$34,999                         | 19.62                 | 0.13 | 20.84                          | 0.27 | 19.31                         | 0.15 |
| \$35,000 to \$59,999                         | 26.27                 | 0.16 | 24.85                          | 0.31 | 26.63                         | 0.17 |
| \$60,000 and over                            | 33.76                 | 0.16 | 29.24                          | 0.33 | 34.91                         | 0.17 |
| <b>Marital status:</b>                       |                       |      |                                |      |                               |      |
| Married                                      | 59.81                 | 0.17 | 54.75                          | 0.35 | 61.10                         | 0.17 |
| Cohabiting                                   | 3.25                  | 0.06 | 3.60                           | 0.11 | 3.16                          | 0.07 |
| Widowed                                      | 6.04                  | 0.07 | 5.37                           | 0.12 | 6.21                          | 0.08 |
| Divorced                                     | 8.45                  | 0.06 | 10.73                          | 0.19 | 7.87                          | 0.07 |
| Separated                                    | 1.98                  | 0.04 | 2.98                           | 0.12 | 1.73                          | 0.04 |
| Never Married                                | 20.46                 | 0.17 | 22.57                          | 0.33 | 19.93                         | 0.17 |

|                                       |       |      |       |      |       |      |
|---------------------------------------|-------|------|-------|------|-------|------|
| Education:                            |       |      |       |      |       |      |
| Less than HS                          | 14.65 | 0.13 | 16.25 | 0.26 | 14.24 | 0.14 |
| High School diploma                   | 29.03 | 0.18 | 29.35 | 0.35 | 28.95 | 0.20 |
| College                               | 56.32 | 0.22 | 54.40 | 0.38 | 56.81 | 0.23 |
| Unemployed                            | 7.16  | 0.09 | 12.31 | 0.25 | 5.85  | 0.09 |
| Not unemployed                        | 92.84 | 0.09 | 87.69 | 0.25 | 94.15 | 0.09 |
| Urban                                 | 28.89 | 0.26 | 30.59 | 0.41 | 28.46 | 0.25 |
| Rural/Not in Central City             | 71.11 | 0.26 | 69.41 | 0.41 | 71.54 | 0.25 |
| Northeast                             | 19.67 | 0.08 | 18.57 | 0.15 | 19.95 | 0.10 |
| Midwest                               | 23.15 | 0.16 | 23.52 | 0.32 | 23.05 | 0.21 |
| South                                 | 35.21 | 0.15 | 34.89 | 0.39 | 35.29 | 0.19 |
| West                                  | 21.97 | 0.11 | 23.02 | 0.23 | 21.71 | 0.15 |
| <b>Lifetime Psychiatric Disorders</b> |       |      |       |      |       |      |
| Axis I Disorders                      |       |      |       |      |       |      |
| Alcohol Use                           | 30.43 | 0.20 | 33.57 | 0.39 | 29.63 | 0.20 |
| Substance Use                         | 10.42 | 0.11 | 15.06 | 0.26 | 9.25  | 0.11 |
| Nicotine Dependence                   | 17.47 | 0.13 | 24.33 | 0.37 | 15.73 | 0.13 |
| Anxiety disorder                      | 17.88 | 0.17 | 31.00 | 0.34 | 14.55 | 0.17 |
| Mood disorder                         | 21.09 | 0.13 | 41.82 | 0.33 | 15.82 | 0.13 |
| Attention Deficit/Hyperactivity       | 2.51  | 0.06 | 5.82  | 0.19 | 1.67  | 0.05 |
| Axis II Disorders                     |       |      |       |      |       |      |
| Borderline                            | 5.89  | 0.08 | 18.44 | 0.28 | 2.70  | 0.07 |
| Schizotypal                           | 3.93  | 0.06 | 11.20 | 0.24 | 2.09  | 0.05 |
| Narcissistic                          | 6.18  | 0.08 | 11.88 | 0.23 | 4.74  | 0.08 |
| Avoidant                              | 2.32  | 0.05 | 6.14  | 0.17 | 1.36  | 0.05 |
| Antisocial                            | 3.63  | 0.07 | 5.86  | 0.21 | 3.07  | 0.07 |
| Dependent                             | 0.43  | 0.02 | 1.36  | 0.09 | 0.19  | 0.01 |
| Obsessive-Compulsive                  | 8.07  | 0.10 | 13.50 | 0.31 | 6.69  | 0.09 |
| Paranoid                              | 4.33  | 0.07 | 9.66  | 0.21 | 2.98  | 0.06 |
| Schizoid                              | 3.06  | 0.06 | 6.44  | 0.21 | 2.21  | 0.05 |
| Histrionic                            | 1.80  | 0.04 | 3.68  | 0.15 | 1.32  | 0.04 |

<sup>a</sup>The sampling weight variable in Wave 2 was used.

<sup>b</sup>Respondents in NESARC Wave 2 who reported low mood lasting two weeks or more during the three-year interval covered in the Wave 2 NESARC and were asked the three suicidal behavior questions.

<sup>c</sup>Respondents in NESARC Wave 2 who did not report low mood and were not asked the three suicidal questions.

Table 2: Percentage of suicide related outcomes (SRO)<sup>a</sup> reported in Wave 2 by Wave 1 characteristics, and unadjusted and adjusted odds ratios for risk of Wave 2 SRO among persons reporting low mood at the NESARC Wave 2 interview. (N=7352)<sup>b</sup>

| Variable                 | % of Wave 2 SRO | Standard error | OR <sup>c</sup> | 95% CI     | AOR <sup>d</sup> | 95% CI     |
|--------------------------|-----------------|----------------|-----------------|------------|------------------|------------|
| <b>Smoking history</b>   |                 |                |                 |            |                  |            |
| Current smoker in Wave 1 | 35.73           | 0.64           | 1.77            | 1.64, 1.90 | 1.41             | 1.28, 1.55 |
| Former Smoker in Wave 1  | 26.68           | 0.67           | 1.16            | 1.07, 1.25 | 1.32             | 1.21, 1.43 |
| Never Smoker in Wave 1   | 23.94           | 0.43           | 1.00            |            | 1.00             |            |
| <b>SRO in Wave 1</b>     | 50.01           | 0.76           | 3.84            | 3.60, 4.10 | 3.49             | 3.18, 3.84 |
| <b>Demographics</b>      |                 |                |                 |            |                  |            |
| Female                   | 28.51           | 0.36           | 1.05            | 0.98, 1.12 | 1.13             | 1.04, 1.22 |
| Male                     | 27.54           | 0.59           | 1.00            |            | 1.00             |            |
| White                    | 28.38           | 0.36           | 1.00            |            | 1.00             |            |
| Black                    | 26.53           | 0.70           | 0.91            | 0.84, 0.99 | 0.84             | 0.76, 0.92 |
| Hispanic                 | 30.33           | 0.52           | 1.10            | 1.04, 1.17 | 1.26             | 1.16, 1.36 |
| Asian/Pacific Islander   | 22.68           | 0.84           | 0.74            | 0.67, 0.82 | 0.93             | 0.82, 1.06 |
| American Indian          | 27.18           | 2.81           | 0.94            | 0.71, 1.25 | 0.69             | 0.51, 0.92 |
| Age 18-19                | 36.65           | 1.73           | 1.00            |            | 1.00             |            |
| Age 20-29                | 31.40           | 0.67           | 0.83            | 0.69, 0.98 | 0.77             | 0.63, 0.94 |
| Age 30-44                | 29.32           | 0.62           | 0.75            | 0.64, 0.88 | 0.73             | 0.60, 0.90 |
| Age 45-64                | 26.82           | 0.63           | 0.66            | 0.56, 0.78 | 0.69             | 0.56, 0.84 |
| Age 65 and over          | 20.90           | 0.93           | 0.47            | 0.39, 0.57 | 0.68             | 0.54, 0.86 |
| Married                  | 24.87           | 0.49           | 1.00            |            | 1.00             |            |
| Cohabiting               | 35.58           | 1.67           | 1.67            | 1.42, 1.96 | 1.27             | 1.07, 1.51 |
| Widowed                  | 24.26           | 1.09           | 0.97            | 0.85, 1.10 | 0.92             | 0.78, 1.07 |
| Divorced                 | 36.01           | 0.84           | 1.70            | 1.57, 1.84 | 1.20             | 1.10, 1.32 |
| Separated                | 37.93           | 1.78           | 1.85            | 1.58, 2.15 | 1.29             | 1.06, 1.56 |
| Never married            | 30.87           | 0.69           | 1.35            | 1.24, 1.46 | 0.97             | 0.87, 1.09 |
| Less than High School    | 31.58           | 0.92           | 1.17            | 1.04, 1.32 | 1.09             | 0.95, 1.25 |
| High School Diploma      | 28.27           | 0.74           | 1.00            |            | 1.00             |            |
| Some College or more     | 27.08           | 0.35           | 0.94            | 0.87, 1.02 | 1.08             | 1.00, 1.17 |
| Unemployed               | 39.93           | 1.17           | 1.84            | 1.68, 2.03 | 1.28             | 1.13, 1.45 |
| Not unemployed           | 26.51           | 0.32           | 1.00            |            | 1.00             |            |



|                                             |       |      |      |            |      |            |
|---------------------------------------------|-------|------|------|------------|------|------------|
| Urban                                       | 29.30 | 0.38 | 1.08 |            | 1.03 | 0.97, 1.10 |
| Rural                                       | 27.66 | 0.46 | 1.00 | 1.02, 1.15 | 1.00 |            |
| <b>Lifetime Psychiatric Disorders</b>       |       |      |      |            |      |            |
| Axis I Disorders                            |       |      |      |            |      |            |
| Alcohol Use                                 | 32.74 | 0.60 | 1.40 | 1.31, 1.49 | 0.95 | 0.87, 1.04 |
| Substance Use                               | 38.42 | 0.94 | 1.75 | 1.61, 1.89 | 0.98 | 0.88, 1.09 |
| Anxiety                                     | 37.57 | 0.60 | 1.72 | 1.62, 1.83 | 1.08 | 1.01, 1.17 |
| Mood                                        | 36.62 | 0.48 | 2.04 | 1.92, 2.17 | 0.77 | 0.70, 0.84 |
| Attention Deficit<br>Hyperactivity Disorder | 51.14 | 1.42 | 2.87 | 2.56, 3.22 | 1.56 | 1.36, 1.79 |
| Axis II Disorders                           |       |      |      |            |      |            |
| Borderline                                  | 55.75 | 0.79 | 4.49 | 4.22, 4.77 | 2.91 | 2.69, 3.16 |
| Schizotypal                                 | 53.41 | 1.26 | 3.44 | 3.09, 3.84 | 1.50 | 1.31, 1.72 |
| Narcissistic                                | 42.49 | 1.01 | 2.08 | 1.89, 2.29 | 1.03 | 0.92, 1.14 |
| Avoidant                                    | 51.87 | 1.37 | 2.97 | 2.66, 3.32 | 1.29 | 1.05, 1.58 |
| Antisocial                                  | 41.55 | 1.39 | 1.89 | 1.68, 2.13 | 0.85 | 0.72, 1.01 |
| Dependent                                   | 56.90 | 2.90 | 3.44 | 2.74, 4.30 | 1.04 | 0.76, 1.41 |
| Ob-Com                                      | 36.07 | 1.05 | 1.53 | 1.39, 1.69 | 0.90 | 0.80, 1.00 |
| Paranoid                                    | 45.74 | 1.16 | 2.37 | 2.14, 2.62 | 0.95 | 0.82, 1.10 |
| Schizoid                                    | 43.81 | 1.26 | 2.10 | 1.89, 2.33 | 1.01 | 0.88, 1.16 |
| Histrionic                                  | 44.42 | 1.83 | 2.10 | 1.82, 2.43 | 0.76 | 0.63, 0.93 |

<sup>a</sup>SRO (Suicide related outcome: feel like want to die, suicide ideation, suicide attempt; 0=None, 1=any SRO).

<sup>b</sup>Missing observations for specific variables: Race – 43, Hispanic origin – 2, age – 13, marital status-4, educational attainment – 70, household income-2544, unemployed – 28, Wave 2 individual suicide related outcomes – 12-18 “unknown” changed to “no”. Treatment of unknown values in determination of psychiatric diagnosis variables is known only to original NESARC project staff at NIAAA.

<sup>c</sup>Odds Ratios (OR) and 95% confidence intervals (CI) based on simple regression models estimating Wave 2 SRO as a function of an individual predictor variable.

<sup>d</sup>Adjusted Odds Ratios (AOR) and 95% CI based on a multiple logistic regression estimating Wave 2 SRO as a function of age, sex, race/ethnicity, marital status, income, education, unemployed status, Census region, urban residence, smoking status, Axis I and Axis II disorders (as described in text), and lifetime SRO prior to Wave 1.

Table 3: Effects on Wave 2 suicide related outcomes (SRO) according to smoking status change as reported in NESARC Wave 1 and Wave 2 interviews.

| Smoking status in Wave 1 to Wave 2                                          | N                   | Weighted percentage <sup>b</sup><br>(standard error) | Wave 2 SRO <sup>a</sup> |              |
|-----------------------------------------------------------------------------|---------------------|------------------------------------------------------|-------------------------|--------------|
|                                                                             |                     |                                                      | AOR <sup>c</sup>        | (95% CI)     |
| 1. Consistent never smoker (in Wave 1 and Wave 2)                           | 3653                | 47.8<br>(0.40)                                       | 1.00                    |              |
| 2. Long-term former smoker (in Wave 1 and Wave 2)                           | 1185                | 16.4<br>(0.26)                                       | 1.22                    | (1.12, 1.34) |
| 3. Recent former smoker (current smoker in Wave 1, former smoker in Wave 2) | 393                 | 5.3<br>(0.14)                                        | 1.37                    | (1.16, 1.63) |
| 4. Persistent current smoker (in Wave 1 and Wave 2)                         | 1824                | 26.3<br>(0.35)                                       | 1.50                    | (1.35, 1.66) |
| 5. New current smoker (never smoker in Wave 1, current smoker in Wave 2)    | 194                 | 2.6<br>(0.10)                                        | 1.82                    | (1.51, 2.19) |
| 6. Relapser (former smoker in Wave 1, current smoker in Wave 2)             | 95                  | 1.5<br>(0.08)                                        | 3.42                    | (2.85, 4.11) |
|                                                                             | N=7352 <sup>d</sup> |                                                      |                         |              |

<sup>a</sup>Any of three items: want to die, suicidal ideation, suicide attempt

<sup>b</sup>The sampling weight variable in Wave 2 was used.

<sup>c</sup>AORs are adjusted odds ratio with 95% confidence intervals (CI) based on multiple logistic regression of Wave 2 SRO as a function of age, sex, race/ethnicity, marital status, income, education, unemployed status, Census region, urban residence, smoking status, Axis I and Axis II disorders (as described in text), and lifetime SRO reported in Wave 1.

<sup>d</sup>The seventh group (n=8), which consisted of persons who were never smokers in Wave 1, began to smoke and then stopped smoking in Wave 2, was too small for a valid assessment of risk.

Table 4: Combined effects of smoking status and prior SRO<sup>a</sup> reported in Wave 1 on a) Wave 2 SRO and b) Wave 2 current smoking

| Wave 1 Smoking status and Wave 1 SRO       | Frequency/<br>N | Weighted<br>percentages<br>(standard<br>error) | AOR <sup>b</sup> | 95% CI            |
|--------------------------------------------|-----------------|------------------------------------------------|------------------|-------------------|
| <b>a) Effect on Wave 2 SRO</b>             |                 |                                                |                  |                   |
| Never smoker - No prior SRO (referent)     | 550 /2978       | 17.5 (0.4)                                     | 1.00             | N.A. <sup>c</sup> |
| Never smoker - Prior SRO                   | 431 / 877       | 46.8 (1.0)                                     | 4.12             | 3.65,4.64         |
| Former smoker - No prior SRO               | 187 / 968       | 20.6 (0.8)                                     | 1.42             | 1.28,1.57         |
| Former smoker - Prior SRO                  | 152 / 312       | 48.2 (1.6)                                     | 4.58             | 3.60,5.82         |
| Current smoker - No prior SRO              | 383 /1466       | 26.6 (0.7)                                     | 1.56             | 1.41,1.74         |
| Current smoker - Prior SRO                 | 426 / 751       | 54.1 (1.2)                                     | 4.77             | 3.70,5.87         |
| <b>b) Effect on Wave 2 Current smoking</b> |                 |                                                |                  |                   |
| Never smoker – No prior SRO (referent)     | 166 /2978       | 5.3 (0.2)                                      | 1.00             | N.A. <sup>c</sup> |
| Never smoker –Prior SRO                    | 28 / 877        | 4.3 (0.4)                                      | 0.70             | 0.60-0.82         |
| Former smoker – No prior SRO               | 71 / 968        | 8.6 (0.5)                                      | 2.20             | 1.77-2.31         |
| Former smoker – Prior SRO                  | 24 / 312        | 6.9 (0.6)                                      | 1.15             | 0.83-1.61         |
| Current smoker – No prior SRO              | 1204 /1466      | 82.7 (0.5)                                     | 82.9             | 73.7-93.2         |
| Current smoker – Prior SRO                 | 620 / 751       | 84.2 (0.8)                                     | 77.0             | 57.6-104.8        |

<sup>a</sup>Any of three items: want to die, suicidal ideation, suicide attempt

<sup>b</sup>AORs are adjusted odds ratios with 95% confidence intervals (CI) based on multiple logistic regression models controlling for demographics and psychiatric history at Wave 1 (shown in Table 1).

<sup>c</sup>Not applicable

STROBE Statement—Checklist of items that should be included in reports of *cohort studies*

|                              | Item No | Recommendation                                                                                                                                                                                                                                                                                                                                                                                                |
|------------------------------|---------|---------------------------------------------------------------------------------------------------------------------------------------------------------------------------------------------------------------------------------------------------------------------------------------------------------------------------------------------------------------------------------------------------------------|
| <b>Title and abstract</b>    | 1       | (a) Indicate the study's design with a commonly used term in the title or the abstract<br>(b) Provide in the abstract an informative and balanced summary of what was done and what was found                                                                                                                                                                                                                 |
| <b>Introduction</b>          |         |                                                                                                                                                                                                                                                                                                                                                                                                               |
| Background/rationale         | 2       | Explain the scientific background and rationale for the investigation being reported                                                                                                                                                                                                                                                                                                                          |
| Objectives                   | 3       | State specific objectives, including any prespecified hypotheses                                                                                                                                                                                                                                                                                                                                              |
| <b>Methods</b>               |         |                                                                                                                                                                                                                                                                                                                                                                                                               |
| Study design                 | 4       | Present key elements of study design early in the paper                                                                                                                                                                                                                                                                                                                                                       |
| Setting                      | 5       | Describe the setting, locations, and relevant dates, including periods of recruitment, exposure, follow-up, and data collection                                                                                                                                                                                                                                                                               |
| Participants                 | 6       | (a) Give the eligibility criteria, and the sources and methods of selection of participants. Describe methods of follow-up<br>(b) For matched studies, give matching criteria and number of exposed and unexposed                                                                                                                                                                                             |
| Variables                    | 7       | Clearly define all outcomes, exposures, predictors, potential confounders, and effect modifiers. Give diagnostic criteria, if applicable                                                                                                                                                                                                                                                                      |
| Data sources/<br>measurement | 8*      | For each variable of interest, give sources of data and details of methods of assessment (measurement). Describe comparability of assessment methods if there is more than one group                                                                                                                                                                                                                          |
| Bias                         | 9       | Describe any efforts to address potential sources of bias                                                                                                                                                                                                                                                                                                                                                     |
| Study size                   | 10      | Explain how the study size was arrived at                                                                                                                                                                                                                                                                                                                                                                     |
| Quantitative variables       | 11      | Explain how quantitative variables were handled in the analyses. If applicable, describe which groupings were chosen and why                                                                                                                                                                                                                                                                                  |
| Statistical methods          | 12      | (a) Describe all statistical methods, including those used to control for confounding<br>(b) Describe any methods used to examine subgroups and interactions<br>(c) Explain how missing data were addressed<br>(d) If applicable, explain how loss to follow-up was addressed<br>(e) Describe any sensitivity analyses                                                                                        |
| <b>Results</b>               |         |                                                                                                                                                                                                                                                                                                                                                                                                               |
| Participants                 | 13*     | (a) Report numbers of individuals at each stage of study—eg numbers potentially eligible, examined for eligibility, confirmed eligible, included in the study, completing follow-up, and analysed<br>(b) Give reasons for non-participation at each stage<br>(c) Consider use of a flow diagram                                                                                                               |
| Descriptive data             | 14*     | (a) Give characteristics of study participants (eg demographic, clinical, social) and information on exposures and potential confounders<br>(b) Indicate number of participants with missing data for each variable of interest<br>(c) Summarise follow-up time (eg, average and total amount)                                                                                                                |
| Outcome data                 | 15*     | Report numbers of outcome events or summary measures over time                                                                                                                                                                                                                                                                                                                                                |
| Main results                 | 16      | (a) Give unadjusted estimates and, if applicable, confounder-adjusted estimates and their precision (eg, 95% confidence interval). Make clear which confounders were adjusted for and why they were included<br>(b) Report category boundaries when continuous variables were categorized<br>(c) If relevant, consider translating estimates of relative risk into absolute risk for a meaningful time period |

|    |                          |    |                                                                                        |
|----|--------------------------|----|----------------------------------------------------------------------------------------|
| 1  | Other analyses           | 17 | Report other analyses done—eg analyses of subgroups and interactions, and              |
| 2  |                          |    | sensitivity analyses                                                                   |
| 3  | <b>Discussion</b>        |    |                                                                                        |
| 4  | Key results              | 18 | Summarise key results with reference to study objectives                               |
| 5  | Limitations              | 19 | Discuss limitations of the study, taking into account sources of potential bias or     |
| 6  |                          |    | imprecision. Discuss both direction and magnitude of any potential bias                |
| 7  | Interpretation           | 20 | Give a cautious overall interpretation of results considering objectives, limitations, |
| 8  |                          |    | multiplicity of analyses, results from similar studies, and other relevant evidence    |
| 9  | Generalisability         | 21 | Discuss the generalisability (external validity) of the study results                  |
| 10 | <b>Other information</b> |    |                                                                                        |
| 11 | Funding                  | 22 | Give the source of funding and the role of the funders for the present study and, if   |
| 12 |                          |    | applicable, for the original study on which the present article is based               |

13  
14  
15  
16  
17  
18  
19  
20  
21  
22  
23  
24  
25  
26  
27  
28  
29  
30  
31  
32  
33  
34  
35  
36  
37  
38  
39  
40  
41  
42  
43  
44  
45  
46  
47  
48  
49  
50  
51  
52  
53  
54  
55  
56  
57  
58  
59  
60

\*Give information separately for exposed and unexposed groups.

**Note:** An Explanation and Elaboration article discusses each checklist item and gives methodological background and published examples of transparent reporting. The STROBE checklist is best used in conjunction with this article (freely available on the Web sites of PLoS Medicine at <http://www.plosmedicine.org/>, Annals of Internal Medicine at <http://www.annals.org/>, and Epidemiology at <http://www.epidem.com/>). Information on the STROBE Initiative is available at <http://www.strobe-statement.org>.



**Smoking and suicidal behaviors in a sample of US adults  
with low mood:  
a retrospective analysis of longitudinal data**

|                                 |                                                                                                                                                                                                                                                                                                                      |
|---------------------------------|----------------------------------------------------------------------------------------------------------------------------------------------------------------------------------------------------------------------------------------------------------------------------------------------------------------------|
| Journal:                        | <i>BMJ Open</i>                                                                                                                                                                                                                                                                                                      |
| Manuscript ID:                  | bmjopen-2012-000876.R2                                                                                                                                                                                                                                                                                               |
| Article Type:                   | Research                                                                                                                                                                                                                                                                                                             |
| Date Submitted by the Author:   | 03-May-2012                                                                                                                                                                                                                                                                                                          |
| Complete List of Authors:       | Covey, Lirio; Columbia University, Psychiatry; New York State Psychiatric Institute, Clinical Therapeutics<br>Berlin, Ivan; Hôpital Pitié-Salpêtrière-Université P&M Curie, Faculté de médecine, Pharmacology<br>Hu, Mei-Chen; Columbia University Medical Center, Psychiatry<br>Hakes, Jahn; U.S. Bureau of Census, |
| <b>Primary Subject Heading</b>: | Smoking and tobacco                                                                                                                                                                                                                                                                                                  |
| Secondary Subject Heading:      | Addiction                                                                                                                                                                                                                                                                                                            |
| Keywords:                       | Suicide & self-harm < PSYCHIATRY, Adult psychiatry < PSYCHIATRY, Epidemiology < TROPICAL MEDICINE                                                                                                                                                                                                                    |
|                                 |                                                                                                                                                                                                                                                                                                                      |

SCHOLARONE™  
Manuscripts

1  
2  
3  
4  
5  
6 **Smoking and suicidal behaviors in a sample of US adults with low mood:**  
7  
8  
9 **a retrospective analysis of longitudinal data**  
10

11 **Lirio S. Covey<sup>a</sup>, Ivan Berlin<sup>b</sup>, Mei-Chen Hu<sup>c</sup>, Jahn K. Hakes<sup>d</sup>**  
12

- 13  
14  
15  
16  
17 a) New York State Psychiatric Institute, Department of Psychiatry, Columbia University,  
18 1051 Riverside Drive, New York, NY 10032, United States  
19  
20  
21 b) Département de Pharmacologie, Hôpital Pitié-Salpêtrière-Assistance publique-Hôpitaux  
22 de Paris-Faculté de médecine, Université P.& M. Curie - INSERM U894, 47,bd de  
23 l'Hôpital, 75013 Paris, France  
24  
25  
26  
27 c) Department of Psychiatry, Columbia University Medical Center, 1051 Riverside Drive,  
28 New York, NY 10032, United States  
29  
30  
31  
32 d) Center for Administrative Records Research and Applications, U.S. Census Bureau, 4700  
33 Silver Hill Rd., Suitland, MD 20746, United States  
34  
35  
36  
37  
38  
39  
40  
41  
42  
43  
44  
45  
46  
47  
48  
49  
50  
51  
52  
53

54 Corresponding author: Lirio S. Covey, New York State Psychiatric Institute, Department of  
55 Psychiatry, Columbia University, 1051 Riverside Drive, New York, NY 10032, United States. E-  
56 mail: lsc3@columbia.edu  
57  
58  
59  
60

**ABSTRACT**

**Objective:** To investigate whether: 1) smoking predicts suicide related outcomes (SRO); 2) prior SRO predicts smoking, 3) smoking abstinence affects the risk of SRO, 4) psychiatric comorbidity modifies the relationship between smoking and SRO.

**Design:** Retrospective analysis of longitudinal data obtained in Wave 1 (2001-2002) and Wave 2 (2004-2005) of the National Epidemiologic Survey of Alcohol and Related Conditions.

**Setting:** Face-to-face interviews conducted with persons in the community.

**Participants:** US adults (N=43,093) aged 18 years or older were interviewed in Wave 1 and re-interviewed (N=34,653) three years later. For the present study, the sample was the subset of persons (N=7,352) who at the Wave 2 interview reported low mood lasting two weeks or more during the past three years and were further queried regarding SRO occurring between Waves 1 and 2.

**Outcome measures:** SRO composed of any of: 1) want to die, 2) suicidal ideation, 3) suicide attempt, reported at Wave 2. Current smoking reported at Wave 2.

**Results:** Current and former smoking in Wave 1 predicted increased risk for Wave 2 SRO independently of prior SRO, psychiatric history, and socio-demographic characteristics measured in Wave 1 (Adjusted Odds Ratio (AOR) =1.41, 95% CI=1.28 to 1.55 for current smoking; AOR=1.32, 95% CI=1.21 to 1.43 for former smoking). Prior SRO did not predict current smoking in Wave 2. Compared with persistent never smokers, risk for future SRO was highest among relapsers (AOR=3.42, 95% CI=2.85 to 4.11); next highest among smoking beginners at Wave 2 (AOR=1.82, 95% CI=1.51 to 2.19); and lowest among long-term (four+ years) former smokers (AOR=1.22, 95% CI=1.12 to 1.34). Compared with persistent current



1  
2  
3 smokers, risk for SRO was lower among long-term ( $p < 0.0001$ ), but not shorter-term ( $p = 0.26$ )  
4  
5 abstainers.  
6

7  
8 **Conclusion:** Smoking increased the risk of future SRO independently of psychiatric  
9  
10 comorbidity. Abstinence of several years duration reduced that risk.  
11

12 **Word count= 298**  
13  
14  
15  
16  
17  
18  
19  
20  
21  
22  
23  
24  
25  
26  
27  
28  
29  
30  
31  
32  
33  
34  
35  
36  
37  
38  
39  
40  
41  
42  
43  
44  
45  
46  
47  
48  
49  
50  
51  
52  
53  
54  
55  
56  
57  
58  
59  
60

For peer review only

## Article Summary

### Article focus

To investigate among persons reporting low mood lasting two weeks or more during the past three years whether:

- smoking predicts suicide related outcomes (want to die, suicidal ideation, suicide attempt); prior suicide related outcomes predict smoking,
- smoking abstinence affects the risk of suicide related outcomes,
- psychiatric comorbidity modifies the relationship between smoking and suicide related outcomes.

### Key messages

- Current and former smoking (less than 4 years' reported abstinence) predicted increased risk for suicide related outcomes independently of prior suicide related outcomes, psychiatric history, and socio-demographic characteristics.
- Prior suicide related outcomes did not predict future current smoking.
- Compared with persistent current smokers, risk of suicide related outcomes was reduced with long-term ( $\geq 4$  years) but not with shorter-term ( $< 4$  years) abstinence.

### Strengths and limitations

#### *Strengths*

- Face-to-face interviews, a longitudinal design, a large representative sample, a validated diagnostic instrument, a comprehensive range of putative predictors that permitted statistical control of the key background factors and comorbidities.

#### *Limitations*

- Only persons with self-reported low mood were questioned about suicide related outcomes; consequently, no generalizability to other populations.
- The sample did not include persons who had completed suicide.
- No assessment of the effects of medical conditions which are possibly causally related to smoking and to suicide related outcomes.
- No information from adolescents, a high risk population for both smoking and suicide related outcomes.

## INTRODUCTION

Suicide is a leading cause of death worldwide. Close to one million persons die from suicide each year. The World Health Organization predicts that by 2020 suicide deaths will rise to 1.5 million (1). Completed suicides are largely predicted by the wish to die, thoughts of suicide, and unsuccessful previous suicidal attempts (2), making it important to understand the risks posed by suicide related outcomes (SRO). A history of mental disorders (3-5) and particular demographic characteristics (female gender, younger age, unmarried status, and unemployment) are putative risk factors for suicide and SRO (2). Smoking, long known as a major risk factor for numerous medical illnesses (6), and recently, for psychiatric outcomes as well (7, 8) has received increasing attention for its potential contribution to the risk of completed suicides and SRO (9). Nevertheless, whether the association between smoking and suicidal behaviours is causal or correlational remains unclear.

A link between smoking and suicide was observed as early as 1976 by Doll and Peto in their study of mortality due to smoking in male British doctors (10). Clinical and epidemiological studies that subsequently investigated the issue are in general, but not universal, agreement in finding a significant association between smoking and suicide and suicidal behaviors. Among studies that focused on SRO, three that used cross-sectional epidemiological data found a positive correlational association between smoking and SRO (11-13). Of seven longitudinal studies that also utilized community-based data, three (14-16) found that current smoking predicted suicidal behaviors even after controlling for the effects of demographic and psychiatric variables; four studies did not find a positive relationship (17-20).

The effect of smoking abstinence on risk of SRO is also unclear. A study of young adults followed for 10 years found that recent, but not pre-survey, cigarette smoking predicted suicidal

1  
2  
3 thoughts and attempts (14). Another study showed higher incidence rates of suicidal ideation  
4  
5 among former smokers than never smokers, but the difference was no longer significant after  
6  
7 adjustment with depressive disorder, anxiety symptoms, and alcohol dependence (16). A study  
8  
9 based on Wave 1 data from the National Epidemiological Survey of Alcohol and Related  
10  
11 Conditions (NESARC) initially found that longer duration of abstinence decreased risk for SRO,  
12  
13 but this effect disappeared upon controlling for psychiatric comorbidity (21).  
14  
15

16  
17 A further question of theoretical and practical importance is whether prior SRO increases  
18  
19 the risk of future smoking. In the single study that has addressed this question, longitudinal data  
20  
21 obtained from adolescents showed that smoking predicted suicidal ideation and suicide attempts  
22  
23 but prior suicidality was not associated with subsequent smoking (15).  
24  
25

26  
27 The present study was conducted to address these conundrums of the smoking-suicide  
28  
29 relationship: 1) whether prior smoking predicts SRO; 2) whether prior SRO predicts smoking; 3)  
30  
31 whether smoking cessation and its corollary, duration of smoking abstinence, affects risk for  
32  
33 SRO, and 4) whether these relationships are independent of comorbid psychiatric illness. Also  
34  
35 explored were the effects of smoking status changes between the two waves of the NESARC on  
36  
37 risk of future SRO. The two-wave format, the large sample, and extensive data on psychiatric  
38  
39 comorbidity that characterized the NESARC (22) permitted assessment of these questions.  
40  
41  
42

43  
44 The survey instrument had asked questions regarding the past occurrence of SRO – want  
45  
46 to die, suicidal ideation, and suicide attempt, only of persons reporting low mood. This  
47  
48 restriction limits the generalizability of findings to the general population, but the much higher  
49  
50 occurrence of suicidal behaviours among persons with low mood (3, 4) provided a more  
51  
52 sensitive context for detecting the risk potential of smoking for suicidal behaviours (23).  
53  
54  
55  
56  
57  
58  
59  
60

## METHODS

Sample: The NESARC data were collected to obtain a representative national sample of US adults. In Wave 1 (2001-2002), face-to-face interviews were completed with 43,093 persons aged 18 years or older. The overall response rate was 81.0%. The Wave 1 sample was re-interviewed in Wave 2 (2004-2005) three years later (mean interval=36.6 months, s.e.=2.62) with a response rate of 80.4% (N=34,653) based on the Wave 1 sample. The NESARC sample size was chosen to be sufficiently large to produce nationally representative proportions for the study of substance abuse and dependence and mental disorders by demographic group with confidence intervals equal to or smaller than extant studies. The NESARC study used a complex survey design and sampling weights upon responses to adjust for sample selection procedures, non-response from selected households or individuals, oversampling (of young adults, Blacks, and Hispanics), and non-response at the Wave 2 time point. Those weights and survey design effects, employed in other studies based on NESARC data, as well as other methodological details of Waves 1 and 2 are described in published NESARC Source and Accuracy Statements (24, 25).

Data for the present study were obtained from a subset of persons (N=7,352) who reported low mood at the Wave 2 interview, irrespective of low mood in Wave 1. This subsample was selected for the present analysis because it produced the largest number of persons from whom evaluable information for predicting Wave 2 SRO was available. The latter subsample is also referred to herein as the “at-risk sample”. Persons who did not report low mood were skipped out of the SRO sections in Waves 1 and 2. The questions for low mood at the Wave 2 interview were: “Since your LAST interview in (month/year), have you ever had a time when you felt sad, blue, depressed, or down most of the time for at least 2 weeks?” and “Since

1  
2  
3 your LAST interview, have you ever had a time, lasting at least 2 weeks, when you didn't care  
4 about the things that you usually cared about, or when you didn't enjoy the things you usually  
5 enjoyed?" At the Wave 1 interview, respondents were asked these same questions referenced to  
6 their *entire lifetime*.  
7  
8  
9  
10  
11

12 Variables: The outcome variables for this study were Wave 2 SRO and Wave 2 current  
13 smoking. The main covariates were prior SRO and smoking status at Wave 1. The individual  
14 SRO questions are: "During that time when (your mood was at its [sic] lowest/you enjoyed or  
15 cared the least about things), did you ... feel like you wanted to die? think about committing  
16 suicide? attempt suicide?" Responses to these items were summed to create the total SRO  
17 question and measured as a dichotomous variable (none of the three=0; any of the three=1).  
18 Respondents who did not report low mood in Wave 1 and were not asked the SRO questions  
19 were assigned a value of 0 for prior SRO.  
20  
21  
22  
23  
24  
25  
26  
27  
28  
29  
30  
31

32 The questions on tobacco use at Wave 1 are: "In your ENTIRE LIFE, have you ever . . .  
33 (a) Smoked at least 100 cigarettes? (b) Smoked at least 50 cigars? (c) Smoked a pipe at least 50  
34 times? (d) Used snuff, such as Skoal, Skoal Bandit [sic] or Copenhagen at least 20 times? (e)  
35 Used chewing tobacco, such as Redman, Levi Garrett or Beechnut at least 20 times?" Persons  
36 who smoked cigarettes, cigars and/or pipes, comprised (a weighted) 95.9% (3368/3497) of all  
37 tobacco users. Following the coding rule of the NESARC, all tobacco users, including the 129  
38 persons who reported using snuff or chewing tobacco only, were labelled as "smokers". A *never*  
39 *smoker* had responded "No" to each of the questions regarding lifetime use of at least 100  
40 cigarettes, at least 50 cigars, smoked a pipe at least 50 times, used snuff at least 20 times, and  
41 used chewing tobacco at least 20 times. A *former smoker* was a "Yes" responder to at least one  
42 of the prior questions who also reported that he or she had not smoked or used tobacco in the  
43  
44  
45  
46  
47  
48  
49  
50  
51  
52  
53  
54  
55  
56  
57  
58  
59  
60

1  
2  
3 past 12 months. (N.B. Very few, if any, of this latter group would have been experiencing  
4 withdrawal; thus, the current study is not an adequate test of post-cessation withdrawal as a  
5 predictor of SRO). A *current smoker* was a “Yes” respondent who had smoked or used tobacco  
6 within the past 12 months. At the Wave 2 interview, these same questions on tobacco use were  
7 asked with regard to the period since the last interview (month/year).  
8  
9

10  
11  
12  
13  
14  
15 The smoking status variable (i.e., never, former, current) rather than DSM-IV defined  
16 nicotine dependence was selected to assess tobacco use because: 1) the adequacy of the DSM-IV  
17 criteria as a valid measure of nicotine dependence remains controversial (26, 27), and 2)  
18 response to the single question on smoking status is easier to elicit in the clinical setting, with  
19 more validity, than responses to a multi-item measure of tobacco use for which no consensus,  
20 stand-alone, instrument yet exists (26, 27). To categorize long-term or recent status as never,  
21 former, or current smokers, a change variable was created with the following categories  
22 according to their report of smoking at Waves 1 and 2: 1) never smoker to never smoker, 2)  
23 former smoker to former smoker, 3) current smoker to former smoker, 4) current smoker to  
24 current smoker, 5) never smoker to current smoker, 6) former smoker to current smoker, and 7)  
25 never smoker to former smoker.  
26  
27  
28  
29  
30  
31  
32  
33  
34  
35  
36  
37  
38  
39

40  
41 Other potential confounders or effect modifiers because of their known correlations with  
42 smoking and/or SRO, measured at Wave 1, were: demographic characteristics (age, gender,  
43 race/ethnicity, marital status, education, employment status, income, urban residence, geographic  
44 region), and lifetime measures of DSM-IV Axis I and Axis II disorders. The Axis I disorders  
45 were categorized into mood disorders (major depression, dysthymia, bipolar I and bipolar II),  
46 anxiety disorders (panic disorder, social phobia, specific phobia, generalized anxiety), alcohol  
47 use disorders (alcohol abuse or dependence), and other substance use disorders (drug abuse or  
48  
49  
50  
51  
52  
53  
54  
55  
56  
57  
58  
59  
60



1  
2  
3 dependence). A history of Attention Deficit Hyperactivity Disorder (ADHD), queried only at  
4  
5 Wave 2, was used among the Wave 1 predictors, its lifetime quality presumed since the DSM-IV  
6  
7 criteria for ADHD include the presence of ADHD symptoms before age seven. All ten of the  
8  
9 Axis II personality disorders measured in AUDADIS-IV (shown in Table 1), measured at Wave  
10  
11 1, were included as well.  
12  
13

14  
15 **Assessment:** For both Waves 1 and 2, the Alcohol Use Disorder and Associated  
16  
17 Disabilities Interview Schedule (AUDADIS-IV) was administered by interviewers from the U.S.  
18  
19 Census Bureau. The reliability and validity of the DSM-IV diagnoses obtained through the  
20  
21 AUDADIS-IV have been demonstrated in clinical and general samples in the U.S. and in other  
22  
23 countries (28).  
24  
25

26  
27 **Statistical Analysis:** Weighted percentages and standard errors measured the distribution  
28  
29 of the covariates (demographic characteristics and lifetime psychiatric variables) reported at  
30  
31 Wave 1 for the sample with low mood and for the complementary sample of persons with no low  
32  
33 mood. Chi-squared tests were used to assess differences between comparison groups, e.g., the at-  
34  
35 risk sample and the complementary sample of NESARC participants who did not report low  
36  
37 mood. Unadjusted and adjusted odds ratios (OR and AOR) and 95% confidence intervals (CI)  
38  
39 were calculated from univariate logistic regressions and multivariate logistic regressions,  
40  
41 respectively, to assess prediction of Wave 2 SRO in the sample of persons reporting low mood.  
42  
43 respectively. The incidence of SRO at Wave 2 (since the Wave 1 interview) by smoking status,  
44  
45 prior SRO, and all other covariates at Wave 1, were also calculated. The opposite temporal  
46  
47 relationship of prior SRO (reported in Wave 1) on future current smoking (reported in Wave 2)  
48  
49 was tested using the identical covariates for assessing predictors of Wave 2 SRO, following  
50  
51 Granger (29). All models were estimated with the PROC SURVEYLOGISTIC function of SAS  
52  
53  
54  
55  
56  
57  
58  
59  
60

1  
2  
3 statistical software version 9.2, with the results verified through an internal statistical review at  
4  
5 the U.S. Census Bureau.  
6  
7

8 Missing values were replaced through imputation using assignment and allocation  
9  
10 methods as described in the NESARC Source and Accuracy Statements (24, 25). Sensitivity  
11  
12 analyses were performed that included: comparison of the at-risk subsample to the  
13  
14 complementary Wave 2 NESARC sample; using different sets of control variables with and  
15  
16 without education, and census region; and including help-seeking behavior controls. These  
17  
18 analyses did not change the associations between smoking and SRO reported below.  
19  
20  
21  
22  
23

## 24 RESULTS

### 25 *Wave 1 Characteristics*

26  
27 Table 1 shows weighted percentages by smoking status, SRO taken together and  
28  
29 individually, demographic characteristics, and psychiatric disorders (DSM-IV Axis I and Axis II)  
30  
31 in the sample of persons reporting low mood at Wave 1 and the rest of the NESARC sample.  
32  
33 Current smoking, SRO, and the prevalence of psychiatric disorders were markedly higher among  
34  
35 the low mood sample, confirming their at-risk status. Other demographic characteristics  
36  
37 previously associated with higher risk of suicide and SROs were also higher in the low mood  
38  
39 subsample: more females, more low and fewer high income responders, fewer married, and more  
40  
41 separated or never married, and more unemployed individuals. Differences by race/ethnicity,  
42  
43 age, urban or rural residence, and geographic area were also observed.  
44  
45  
46  
47  
48  
49  
50

### 51 *Effects of Wave 1 characteristics on Wave 2 SRO*

1  
2  
3 From here on, reported statistics are for the sample of persons reporting low mood at  
4  
5 Wave 2. The overall incidence rate of SRO (occurring between the Wave 1 and Wave 2  
6  
7 interviews) was 28.2% (s.e.=0.33%). Table 2 shows weighted percentages and odds ratios for  
8  
9 Wave 2 SRO by smoking history, prior SRO, and the control variables as reported in Wave 1.  
10  
11 Unadjusted odds ratios (OR) and 95% CI for future SRO are shown as reference points. The  
12  
13 adjusted odds ratios (AOR) and 95% CI show significantly higher risk of Wave 2 SRO for both  
14  
15 Wave 1 current smokers (AOR=1.41, 95% CI= 1.28, 1.55) and former smokers (AOR=1.32,  
16  
17 95% CI=1.21, 1.43) relative to never smokers. The difference in point estimates of risk between  
18  
19 current versus former smokers was not significant ( $\chi^2=1.95$ ,  $p = 0.16$ ).  
20  
21  
22  
23

24  
25 The multivariate model showed that SRO in Wave 1 is the strongest predictor of a Wave  
26  
27 2 SRO (AOR=3.49, 95% CI= 3.18, 3.84). Significant, independent risk of future SRO was also  
28  
29 observed for individuals who were female, Hispanic, younger, cohabiting, divorced or separated,  
30  
31 of lower income, unemployed, and resided outside the Northeast region. Of the DSM-IV Axis I  
32  
33 disorders, only anxiety (AOR= 1.08, 95% CI=1.01, 1.17) and ADHD (AOR=1.56, 95% CI=1.36,  
34  
35 1.79) showed significantly elevated risk of Wave 2 SRO; mood disorder was correlated with  
36  
37 reduced Wave 2 SRO risk (AOR=0.77; 95% CI=0.70, 0.84). Three of the DSM-IV Axis II  
38  
39 disorders, i.e., borderline personality, schizotypal, and avoidant personality, showed significantly  
40  
41 increased risk for Wave 2 SRO.  
42  
43  
44  
45

#### 46 47 48 *Smoking status change from Wave 1 to Wave 2* 49

50  
51 The great majority of the sample (90.5%) did not change their smoking status as never,  
52  
53 former, or current smoker, between Waves 1 and 2 (Table 3). Among the remaining 9.5%, over  
54  
55 half (5.3%) had shifted from being current smokers to former smokers; more than a fourth  
56  
57  
58  
59  
60

1  
2  
3 (2.6%) were never smokers in Wave 1 who became current smokers in Wave 2; and a smaller  
4  
5 proportion (<2%) who were former smokers in Wave 1 relapsed to smoking in Wave 2.  
6  
7

8 a) *Effects on Wave 2 SRO.* Table 3 shows adjusted odds ratios indicating significant  
9  
10 risk for SRO among all categories of ever-smokers relative to the persistent never smokers. The  
11  
12 highest risk was seen for relapsers (former smoker to current smoker) (AOR=3.42, 95%  
13  
14 CI=2.85, 4.11); new smokers (never smoker to current smoker) showed the next highest risk  
15  
16 (AOR=1.82, 95% CI=1.51, 2.19); and long-term former smokers (during both Wave 1 and 2 )  
17  
18 showed the least elevated, yet still significant, risk (AOR=1.22, 95% CI=1.12, 1.34). The  
19  
20 seventh category consisting of never smokers in Wave 1 who reported former smoker status in  
21  
22 Wave 2 was too small for a valid analysis.  
23  
24  
25

26  
27 b) *Comparative risks by abstinence duration, relapse, and new smoking.* Pair-wise  
28  
29 chi-squared tests for equality of coefficients permitted a comparison of risk estimates for Wave  
30  
31 2 SRO (shown in Table 3) between categories of smoking status change. Given the three-year  
32  
33 interval between Waves 1 and 2 and the coding requirement that former smoking status is  
34  
35 assigned only upon reporting of at least 12 months of abstinence, long-term former smokers  
36  
37 (Category 2, Table 3) would have been abstinent for at least four years. Persons who shifted  
38  
39 from current smoking in Wave 1 to former smoking in Wave 2 (Category 3, Table 3) would  
40  
41 have been abstinent for at least 12 months and a maximum of four years.  
42  
43  
44

45  
46 The analysis showed that the AOR for Wave 2 SRO among recent former smokers  
47  
48 (Category 3) did not differ from persistent current smokers (Category 4) ( $\chi^2(1) = 1.26, p = 0.26$ ).  
49  
50 However, long-term former smokers (Category 2) showed a significantly lower AOR for Wave 2  
51  
52 SRO than persistent current smokers ( $\chi^2(1) = 16.9, p < 0.0001$ ). These data suggest that a  
53  
54 reduction in risk for future SRO with past smoking becomes apparent after a considerable period  
55  
56  
57  
58  
59  
60

1  
2  
3 of abstinence. Of additional interest were the risk estimates associated with re-starting (i.e.  
4 relapse) and with beginning to smoke in Wave 2. Compared to persistent current smokers, the  
5 AOR for Wave 2 SRO was significantly higher for both relapsers ( $\chi^2(1) = 56.00$ ,  $p < 0.0001$ ), and  
6 smoking beginners in Wave 2 ( $\chi^2(1) = 4.11$ ,  $p = 0.04$ ). Further, the AOR for Wave 2 SRO was  
7 significantly higher among relapsers than beginning smokers ( $\chi^2(1) = 19.0$ ,  $p < 0.0001$ ).  
8  
9  
10  
11  
12  
13  
14  
15  
16  
17

### 18 *Does prior SRO predict smoking?*

19  
20 A multiple regression model on current smoking in Wave 2 was fit using the identical list  
21 of control variables for predicting Wave 2 SRO. This second model did not show a direct effect  
22 of prior SRO on Wave 2 current smoking. Persons with Wave 1 SROs were *less* likely to report  
23 current smoking status at Wave 2 than were persons who did not experience SRO in Wave 1  
24 (AOR=0.81, 95% CI=0.72, 0.90).  
25  
26  
27  
28  
29  
30  
31

32 To understand the temporal relationship between smoking and SRO, the effects of the  
33 interaction of Wave 1 smoking status (current vs. never smoker and former vs. never smoker)  
34 with history of prior SRO were examined. Table 4 shows adjusted odds ratios from separate  
35 multiple regression models on SRO and on current smoking in Wave 2 for combined effects of  
36 smoking status and prior SRO reported in Wave 1. Never smokers without a prior SRO at Wave  
37 1 comprised the reference group in each model. These analyses did not fundamentally change the  
38 finding that smoking predicts increased risk of SRO and that the reverse relationship does not  
39 hold, but indicates nuanced impact of both SRO and smoking history.  
40  
41  
42  
43  
44  
45  
46  
47  
48  
49

50 The model on Wave 2 SRO (Table 4 section a) shows that, other characteristics (e.g.,  
51 demographics and psychopathology) being equal: a) all combinations of smoking status and SRO  
52 history had statistically significant risks for Wave 2 SRO relative to never smokers without prior  
53  
54  
55  
56  
57  
58  
59  
60

1  
2  
3 SRO; and b) for each smoking category, the risks were considerably greater when the combined  
4  
5 group involved a prior SRO. The data also show that former smoking and current smoking, in  
6  
7 the absence of prior SRO, are valid predictors of an *initial* SRO. However, once a person has had  
8  
9 a SRO, smoking status history does not change the risk prediction - the risk of *recurrence* is fully  
10  
11 predicted by that prior SRO and the other characteristics. The second model, on Wave 2 current  
12  
13 smoking (Table 4 section b), shows an expectedly substantial likelihood of being a current  
14  
15 smoker in Wave 2 for current smokers in Wave 1, regardless of SRO history. Of interest, prior  
16  
17 SRO predicted a contrasting *reduction* in the likelihood of smoking uptake in Wave 2 for former  
18  
19 smokers and never smokers.  
20  
21  
22  
23  
24  
25  
26

## 27 DISCUSSION

28  
29 The main findings from the present sample of persons reporting low mood are: 1) current  
30  
31 and past smoking predicted increased risk for SRO independently of demographics, psychiatric  
32  
33 factors, and prior SRO; 2) long-term smoking abstinence was associated with lower risk than  
34  
35 persistent smoking; 3) new smoking due to relapse after a period of abstinence or to initiation of  
36  
37 smoking by erstwhile never smokers was associated with an increased risk of SRO relative to  
38  
39 persistent smoking; 4) prior SRO did not increase the risk of future smoking.  
40  
41  
42

43 For three Axis I disorders, i.e., mood, alcohol use, and substance use, the adjusted odds  
44  
45 ratios indicated either insignificant effects or a decreased risk of future SRO. These results differ  
46  
47 from the increased risks found in the unadjusted analyses, indicating confounding effects of  
48  
49 correlated predictors of SRO, for example, prior SRO and comorbid psychiatric disorders (3-5).  
50  
51 In further analysis that excluded prior SRO in the multivariate model, a positive, predictive effect  
52  
53 of mood disorder on future SRO (AOR=2.05, 95% CI=1.92,2.17) was observed, contrary to the  
54  
55  
56  
57  
58  
59  
60

1  
2  
3 reduced effect of mood disorder in the full model that adjusted for prior SRO (results available  
4 upon request). This finding exemplifies an instance when collinearity with a stronger predictor  
5 (e.g., Wave 1 SRO) overwhelmed the explanatory power of other predictors with weaker  
6 relationships. It is thus remarkable that significant effects of smoking on risk of SRO remained  
7 despite the evidence of effect suppression due to confounding. Ranked in decreasing order, the  
8 significant predictors of SRO risk in the present sample were: prior SRO, borderline personality  
9 disorder, ADHD, schizotypal disorder, current smoking, former smoking, avoidant personality  
10 disorder, and selected demographic characteristics.  
11  
12  
13  
14  
15  
16  
17  
18  
19  
20  
21

22 Other than the present one, there have been seven longitudinal epidemiological studies of  
23 smoking and SRO (14-20). The positive effect of current smoking on future SRO reported here  
24 was also observed in three studies (14-16). Problems of recall due to the long, ten year, interval  
25 between data time points could explain the negative finding of the study by Kessler et al (17);  
26 while the younger age of the samples in two studies (19-20) could have masked a future effect.  
27 Of clinical and public health importance is the finding, first reported here, that longer abstinence  
28 from smoking decreased the risk for SRO. The latter observation, not considered in two negative  
29 studies regarding past smoking (14, 16), could account for the inconsistent findings. Notably,  
30 the divergence according to longevity of abstinence is consistent with evidence for lung cancer  
31 and other smoking-related disorders that risk reduction from stopping smoking occurs only after  
32 multiple years of abstinence (31, 32). The worrisome observation that relapsers and new  
33 smokers are at even higher risk of future SRO than persistent smokers suggests particular targets  
34 for increased therapeutic attention. Finally, the data negated a reverse temporal relationship of  
35 SRO on smoking, as also seen in a study of adolescents (15). Instead, a reduction in risk for  
36 future smoking was observed among former and never smokers with prior SRO in Wave 1  
37  
38  
39  
40  
41  
42  
43  
44  
45  
46  
47  
48  
49  
50  
51  
52  
53  
54  
55  
56  
57  
58  
59  
60



1  
2  
3 compared to their counterparts without prior SRO. Perhaps among those former and never  
4  
5 smokers, already inclined towards the pro-health behaviour of not currently smoking, was a  
6  
7 subset spurred by the prior SRO to undertake further health-promoting and therapeutic actions,  
8  
9 which immunized them against future smoking. Their counterparts who did not experience a  
10  
11 prior SRO were less likely to be as self-protective or to seek counselling and similar treatments,  
12  
13 and were less immunized against resorting to new smoking. The serendipitous observation from  
14  
15 the present sample that prior SRO and treatment seeking were well-correlated ( $r=0.43$ ,  $p=0.0001$ )  
16  
17 is consistent with that conjecture.  
18  
19  
20  
21

22 Strengths and limitations of the study are noted. An important strength is the  
23  
24 concomitance of rigorous methods and materials not found in prior work on the smoking-suicide  
25  
26 question – face-to-face interviews, a longitudinal design, a large sample, a validated instrument,  
27  
28 and a comprehensive range of putative predictors that permitted statistical control of key  
29  
30 background factors and comorbidities. A further strength is the use of a simple yet meaningful  
31  
32 measure of smoking status (i.e., never, former or current smoking), that is easy for a questioner  
33  
34 to administer and for the respondent to recall and understand. Even so, study limitations call for  
35  
36 cautious interpretation of the findings. The present sample comprised the subgroup (22%) of  
37  
38 Wave 2 participants ( $N=34,653$ ) who self-reported low mood during the three-year interval  
39  
40 between the interviews. This selectivity yields findings relevant to mental health settings that are  
41  
42 likely to serve persons experiencing mood problems; however, they may not generalize to the  
43  
44 rest of the NESARC sample or to the national population. Second, the sample did not include  
45  
46 persons who had completed suicide attempts. Using the U.S. rate of 11.1 per 100,000 population  
47  
48 per year (30), the Wave 1 sample of 43,093 could be expected to include about 14 persons with  
49  
50 completed suicides before Wave 2 (95% CI= 6.8, 21.6), introducing a non-trivial, although likely  
51  
52  
53  
54  
55  
56  
57  
58  
59  
60



1  
2  
3 small, selection bias. Third, the present study did not assess the effects of medical conditions  
4  
5 which are possibly causally related, albeit in different directions, to smoking and to SRO. Fourth,  
6  
7 the NESARC did not obtain information from adolescents, a subgroup with a known high risk  
8  
9 for SRO (2). Finally, in exploratory, unadjusted, analyses, predictive effects of current smoking  
10  
11 were observed across the individual SRO whereas past smoking predicted want to die and  
12  
13 suicidal ideation, but not suicide attempt. Validation and articulation of these preliminary  
14  
15 observations need to be accomplished in future work.  
16  
17  
18  
19

20 The rigorous methodology employed in the NESARC gives eminent credence to the  
21  
22 central findings of this analysis - an independent effect of smoking on SRO and the absence of a  
23  
24 positive influence of prior SRO on future smoking. These results are consistent with the  
25  
26 hypothesis that smoking exerts a contributing, and not simply a correlational, effect on risk of  
27  
28 SRO. By contrast, these results are inconsistent with the hypothesis that SRO causes smoking or  
29  
30 that a third factor causes both smoking and SRO. The neurobiological, genetic, psychiatric and  
31  
32 psychological underpinnings of these associations warrant further investigation. The knowledge  
33  
34 gained could advance prevention and treatment options for reducing the prevalence of tobacco  
35  
36 use and suicide.  
37  
38  
39  
40  
41  
42  
43  
44  
45  
46  
47

48 **Manuscript word count= 4,176**  
49  
50  
51  
52  
53  
54  
55  
56  
57  
58  
59  
60

1  
2  
3  
4  
5  
6  
7  
8 Copyright. The Corresponding Author has the right to grant on behalf of all authors and does  
9 grant on behalf of all authors, [a worldwide license](#) to the Publishers and its licensees in  
10 perpetuity, in all forms, formats and media (whether known now or created in the future), to i)  
11 publish, reproduce, distribute, display and store the Contribution, ii) translate the Contribution  
12 into other languages, create adaptations, reprints, include within collections and create  
13 summaries, extracts and/or, abstracts of the Contribution, iii) create any other derivative work(s)  
14 based on the Contribution, iv) to exploit all subsidiary rights in the Contribution, v) the inclusion  
15 of electronic links from the Contribution to third party material where-ever it may be located;  
16 and, vi) license any third party to do any or all of the above.  
17  
18  
19  
20  
21  
22  
23  
24  
25  
26  
27  
28  
29  
30  
31

32 The National Epidemiologic Survey on Alcohol and Related Conditions was sponsored by the  
33 National Institute on Alcohol Abuse and Alcoholism (NIAAA) and funded in part by the  
34 Intramural Program, NIAAA, National Institutes of Health, with additional support from the  
35 National Institute on Drug Abuse. No funding was obtained for this secondary analysis.  
36  
37  
38  
39  
40  
41  
42

43 All authors have completed the Unified Competing Interest form  
44 ([www.icmje.org/coi\\_disclosure.pdf](http://www.icmje.org/coi_disclosure.pdf). 1) JH received support from NIAAA through the US  
45 Census Bureau for the submitted work; 2) LC, IB, and MH received no specific support for this  
46 work; 3) IB received occasional honoraria for participating in advisory panels of Pfizer Ltd  
47 during the last 3 years; 4) in February 2011, LC provided educational consultation to a law firm  
48 regarding mood effects of smoking cessation; 4) JH and MH had no relationships with any  
49  
50  
51  
52  
53  
54  
55  
56  
57  
58  
59  
60

1  
2  
3 company that might have an interest in the submitted work in the previous 3 years; 5) none of the  
4  
5 spouses of the authors had financial relationships that may be relevant to the submitted work; 6)  
6  
7 none of the authors had a non-financial interest that may be relevant to the submitted work.  
8  
9

10  
11 Lirio Covey and Ivan Berlin conceptualized this study and, with Mei-Chen Hu, designed the  
12  
13 analysis. Jahn Hakes had full access to all of the data in the study and takes responsibility for the  
14  
15 integrity of the data and the accuracy of the data analysis. Lirio Covey was the lead writer of the  
16  
17 manuscript. All authors participated in the interpretation of findings and writing of the  
18  
19 manuscript. All authors had full access to the statistical reports, tables, and the manuscript; and  
20  
21 take responsibility for the integrity of the data and the accuracy of the data analysis. The U.S.  
22  
23 Census Bureau, NIAAA, and other employers of the authors had no role in the study design,  
24  
25 implementation of the study, analysis and interpretation of data, in the writing of the report, and  
26  
27 the decision to submit the article for publication.  
28  
29  
30  
31  
32  
33  
34

35 The authors thank the reviewers of this article for their helpful comments.  
36  
37  
38

39 The study is a secondary analysis of data collected by the National Institute of Health-National  
40  
41 Institute of Alcohol and Alcohol Abuse of the US government. Before data collection, each  
42  
43 respondent was informed of the nature of the survey and its potential uses, ensured of  
44  
45 confidentiality, and told that participation was voluntary. All participants signed a consent form  
46  
47 prior to participating in the interviews. The US Census Bureau and the US Office of  
48  
49 Management and Budget reviewed and approved the ethics protocol. Individual data files are  
50  
51 de-identified to prevent full anonymity of participants. Approval for conducting this secondary  
52  
53 analysis of previously collected data was not required.  
54  
55  
56  
57  
58  
59  
60

1  
2  
3  
4  
5  
6 In order to safeguard sensitive personal information, NESARC data are not available for public  
7  
8 use. The restricted use data sets are maintained by the U.S. Census Bureau on behalf of NIAAA,  
9  
10 and any requests to use NESARC data for replication or other purposes may be directed to the  
11  
12 NIAAA coordinator for NESARC, Aaron White ([whitea4@mail.nih.gov](mailto:whitea4@mail.nih.gov)).  
13  
14  
15  
16  
17  
18  
19  
20  
21  
22  
23  
24  
25  
26  
27  
28  
29  
30  
31  
32  
33  
34  
35  
36  
37  
38  
39  
40  
41  
42  
43  
44  
45  
46  
47  
48  
49  
50  
51  
52  
53  
54  
55  
56  
57  
58  
59  
60

For peer review only

## REFERENCES

1. World Health Organization. *Suicide prevention*. (2010) Retrieved from [http://www.who.int/mental\\_health/prevention/suicide/suicideprevent/en/accessed](http://www.who.int/mental_health/prevention/suicide/suicideprevent/en/accessed) .
2. Nock MK, Borges G, Bromet EJ, Cha CB, Kessler RC, Lee S. Suicide and suicidal behavior. *Epidemiol Rev*. 2008;30 (1):133-54.
3. Tidemalm D, Långström N, Lichtenstein P, Runeson B. Risk of suicide after suicide attempt according to coexisting psychiatric disorder: Swedish cohort study with long term follow-up. *BMJ*. 2008 Nov 18;337:a2205.
4. Harris EC, Barraclough B. Suicide as an outcome for mental disorders. A meta-analysis. *Br. J Psychiatry*, 1997; 170: 205-208.
5. Nock MK, Hwang I, Sampson NA, Kessler RC. Mental disorders, comorbidity and suicidal behavior: results from the National Comorbidity Survey Replication. *Mol Psychiatry*. 2010;15(8):868-76.
6. CDC - Health Effects - Smoking & Tobacco Use, [http://www.cdc.gov/tobacco/basic\\_information/health\\_effects/index.htm](http://www.cdc.gov/tobacco/basic_information/health_effects/index.htm)
7. John U, Meyer C, Rumpf HJ, Hapke U. Smoking, nicotine dependence and psychiatric comorbidity--a population-based study including smoking cessation after three years. *Drug Alcohol Depend*. 2004 ; 76(3):287-95.
8. Choi WS, Patten CA, Gillin JC, Kaplan RM, Pierce JP, Cigarette smoking predicts development of depressive symptoms among U.S. adolescents. *Ann Behav Med*; 1997 ;19 (1):42-50.
9. Hughes, J. R. Smoking and suicide: A brief overview. *Drug Alcohol Depend*. 2008; 98 (3), 169–178.
10. Doll R, Peto R. Mortality in relation to smoking, 20 years' observations on male British doctors. *BMJ*. 1976; 2 (6051): 1525-1536.
11. Bolton, JM, Robinson J. Population-attributable fractions of Axis I and Axis II mental disorders for suicide attempts; Findings from a representative sample of the adult, non-institutionalized US population. *Am J Public Health*, 2010; 100 (12): 2473-2480.
12. Scherrer JF, Grant JD, Agrawal A, Madden PA, Fu Q, Jacob T, Bucholz KK, Xian H. Suicidal Behavior, Smoking, and Familial Vulnerability. *Nicotine Tob Res*. 2012;14(4):415-424

13. Yaworski D, Robinson J, Sareen J, Bolton JM. The relation between nicotine dependence and suicide attempts in the general population. *Can J Psychiatry*. 2011 Mar;56(3):161-70.
14. Breslau N, Schultz LR, Johnson EO, Peterson EL, Davis GC. Smoking and the risk of suicidal behavior: a prospective study of a community sample. *Arch Gen Psychiatry*, 2005; 62 (3): 328-334.
15. Bronisch T, Höfler M, Lieb R. Smoking predicts suicidality: findings from a prospective community study. *J Affect Disord*. 2008;108(1-2):135-45
16. Clarke DE, Eaton WE, Petronis KR, Ko JY, Chatterjee A, Anthony JC. Increased risk of suicidal ideation in smokers and former smokers compared to never smokers: Evidence from the Baltimore ECA follow-up study. *Suicide Life Threat Behav*. 2010; 40 (4): 307-318.
17. Kessler RC, Borges G, Sampson N, Miller M, Nock MK. The association between smoking and subsequent suicide-related outcomes in the National Comorbidity Survey panel sample. *Molecular Psychiatry*. 2009; 14(12):1132-42.
18. Boden JM, Fergusson DM., Horwood LJ. Cigarette smoking and suicidal behaviour: results from a 25-year longitudinal study. *Psychol Med*. 2008; 38(3): 433-439.
19. McGee R, Williams S, Nada-Raja S. Is cigarette smoking associated with suicidal ideation among young people? *Am J Psychiatry*. 2005; 162(3):619-20.
20. Wilcox HC, Anthony JC. The development of suicidal ideation and attempts: an epidemiologic study of first graders followed into young adulthood. *Drug Alcohol Dependence* 2004; 76 (Suppl): S53-S67.
21. Berlin I, Covey LS, Donohue MC, Agostini V. Duration of smoking abstinence and suicide-related outcomes. *Nicotine Tob Res*. 2011;13(10):887-893.
22. Grant BF, Stinson FS, Dawson DA, Chou SP, Ruan WJ, Pickering RP. Co-occurrence of 12-month alcohol and drug use disorders and personality disorders in the United States: results from the National Epidemiologic Survey on Alcohol and Related Conditions. *Arch Gen Psychiatry*. 2004;61(4):361-8.
23. Nordentoft M. Prevention of suicide and attempted suicide in Denmark. Epidemiological studies of suicide and intervention studies in selected risk groups. *Dan Med Bull*. 2007; 54(4):306-69.
24. Grant BF, et al. Source and Accuracy Statement for Wave 1 of the 2001-2002 NESARC. National Institute on Alcohol Abuse and Alcoholism: Bethesda, MD; 2003. URL: <https://www.fbo.gov/utills/view?id=2f8b6b30ed2a57485da564b32f6e9e60>.

- 1  
2  
3 25. Grant, B.F., and Kaplan, K.D. Source and Accuracy Statement for the 2004–2005 Wave 2  
4 National Epidemiologic Survey on Alcohol and Related Conditions. Bethesda, MD;  
5 National Institute on Alcohol Abuse and Alcoholism, 2005. URL:  
6 <https://www.fbo.gov/utills/view?id=808b8e8cfcaa3c366c39c2ef643a40d5>.  
7  
8
- 9  
10 26. Hughes JR, Baker T, Breslau N, Covey L, Shiffman S. Applicability of DSM criteria to  
11 nicotine dependence. *Addiction*. 2011;106(5):894-5  
12
- 13 27. Mwenifumbo JC, Tyndale RF. DSM-IV, ICD-10 and FTND: Discordant Tobacco  
14 Dependence Diagnoses in Adult Smokers, *J Addict Res Ther*, 2011; 2:1  
15
- 16 28. Ruan WJ, Goldstein RB, Chou SP, Smith SM, Saha TD, Pickering RP, Dawson DA,  
17 Huang B, Stinson FS, Grant BF. The alcohol use disorder and associated disabilities  
18 interview schedule-IV (AUDADIS-IV): reliability of new psychiatric diagnostic modules  
19 and risk factors in a general population sample. *Drug Alcohol Depend*. 2008; 92(1-3):27-  
20 36.  
21  
22
- 23 29. Granger CWJ. Investigating Causal Relations by Econometric Models and Cross-Spectral  
24 Methods. *Econometrica*. 1969; 37(3):424-438.  
25  
26
- 27 30. National Institute of Mental Health, Suicide in the United States, Statistics and Prevention,  
28 NIH Publication No. 06-4594, pp 56-59 [www.nimh.gov](http://www.nimh.gov).  
29  
30
- 31 31. Novello, AC. Surgeon General's report on the health benefits of smoking cessation. *Public*  
32 *Health Rep*. 1990; 105(6): 545–548.  
33  
34
- 35 32. Cao, Y, Kenfield S, Song Y, Rosner B, Qiu W, Sesso HD, Gaziano JM. Cigarette  
36 Smoking Cessation and Total and Cause-Specific Mortality: A 22-Year Follow-up Study  
37 Among US Male Physicians. *Arch Intern Med* 2011; 171 (21), 1956-1958.  
38  
39  
40  
41  
42  
43  
44  
45  
46  
47  
48  
49  
50  
51  
52  
53  
54  
55  
56  
57  
58  
59  
60

Table 1: Wave 1 characteristics of the low mood sample and the rest of the NESARC Wave 2 sample. Weighted percentages<sup>a</sup> (%) and standard error (s.e)

| Variable                                     | Total Wave 2 sample % | s.e. | Low mood sample <sup>b</sup> % | s.e. | Rest of sample <sup>c</sup> % | s.e. |
|----------------------------------------------|-----------------------|------|--------------------------------|------|-------------------------------|------|
| Sample size                                  | 34,653                |      | 7,352                          |      | 27,301                        |      |
| <b>Smoking status</b>                        |                       |      |                                |      |                               |      |
| Current smoker                               | 27.02                 | 0.17 | 31.65                          | 0.38 | 25.85                         | 0.19 |
| Former smoker                                | 19.58                 | 0.16 | 17.84                          | 0.28 | 20.02                         | 0.17 |
| Never smoker                                 | 53.40                 | 0.19 | 50.51                          | 0.42 | 54.13                         | 0.20 |
| <b>Wave 1 Suicide related outcomes (SRO)</b> |                       |      |                                |      |                               |      |
| Want to die                                  | 11.42                 | 0.10 | 25.55                          | 0.27 | 7.84                          | 0.10 |
| Suicidal ideation                            | 10.17                 | 0.10 | 23.35                          | 0.26 | 6.82                          | 0.10 |
| Suicide ideation                             | 8.42                  | 0.09 | 19.27                          | 0.27 | 5.66                          | 0.09 |
| Suicide attempt                              | 2.35                  | 0.04 | 6.09                           | 0.17 | 1.40                          | 0.04 |
| <b>Demographics</b>                          |                       |      |                                |      |                               |      |
| <b>Gender</b>                                |                       |      |                                |      |                               |      |
| Female                                       | 52.08                 | 0.16 | 64.13                          | 0.40 | 49.02                         | 0.17 |
| Male                                         | 47.92                 | 0.16 | 35.87                          | 0.40 | 50.98                         | 0.17 |
| <b>Race/Ethnicity</b>                        |                       |      |                                |      |                               |      |
| White                                        | 70.93                 | 0.24 | 71.39                          | 0.40 | 70.81                         | 0.25 |
| Black                                        | 10.75                 | 0.20 | 10.61                          | 0.22 | 10.79                         | 0.21 |
| Hispanic                                     | 11.56                 | 0.10 | 11.20                          | 0.15 | 11.65                         | 0.12 |
| Asian/Pac. Islander                          | 4.36                  | 0.06 | 3.50                           | 0.10 | 4.58                          | 0.06 |
| Amer. Indian/Alaska Native                   | 2.40                  | 0.11 | 3.29                           | 0.20 | 2.17                          | 0.11 |
| <b>Age:</b>                                  |                       |      |                                |      |                               |      |
| 18-19                                        | 4.02                  | 0.07 | 4.47                           | 0.15 | 3.91                          | 0.08 |
| 20-29                                        | 17.78                 | 0.14 | 19.28                          | 0.30 | 17.40                         | 0.15 |
| 30-44                                        | 30.90                 | 0.17 | 32.28                          | 0.29 | 30.54                         | 0.18 |
| 45-64                                        | 31.08                 | 0.15 | 31.64                          | 0.24 | 30.94                         | 0.17 |
| 65 and over                                  | 16.22                 | 0.10 | 12.32                          | 0.25 | 17.21                         | 0.12 |
| <b>Household Income:</b>                     |                       |      |                                |      |                               |      |
| Less than \$20,000                           | 20.35                 | 0.17 | 25.07                          | 0.32 | 19.15                         | 0.19 |
| \$20,000 to \$34,999                         | 19.62                 | 0.13 | 20.84                          | 0.27 | 19.31                         | 0.15 |
| \$35,000 to \$59,999                         | 26.27                 | 0.16 | 24.85                          | 0.31 | 26.63                         | 0.17 |
| \$60,000 and over                            | 33.76                 | 0.16 | 29.24                          | 0.33 | 34.91                         | 0.17 |
| <b>Marital status:</b>                       |                       |      |                                |      |                               |      |
| Married                                      | 59.81                 | 0.17 | 54.75                          | 0.35 | 61.10                         | 0.17 |
| Cohabiting                                   | 3.25                  | 0.06 | 3.60                           | 0.11 | 3.16                          | 0.07 |
| Widowed                                      | 6.04                  | 0.07 | 5.37                           | 0.12 | 6.21                          | 0.08 |
| Divorced                                     | 8.45                  | 0.06 | 10.73                          | 0.19 | 7.87                          | 0.07 |
| Separated                                    | 1.98                  | 0.04 | 2.98                           | 0.12 | 1.73                          | 0.04 |
| Never Married                                | 20.46                 | 0.17 | 22.57                          | 0.33 | 19.93                         | 0.17 |



|                                       |       |      |       |      |       |      |
|---------------------------------------|-------|------|-------|------|-------|------|
| Education:                            |       |      |       |      |       |      |
| Less than HS                          | 14.65 | 0.13 | 16.25 | 0.26 | 14.24 | 0.14 |
| High School diploma                   | 29.03 | 0.18 | 29.35 | 0.35 | 28.95 | 0.20 |
| College                               | 56.32 | 0.22 | 54.40 | 0.38 | 56.81 | 0.23 |
| Unemployed                            | 7.16  | 0.09 | 12.31 | 0.25 | 5.85  | 0.09 |
| Not unemployed                        | 92.84 | 0.09 | 87.69 | 0.25 | 94.15 | 0.09 |
| Urban                                 | 28.89 | 0.26 | 30.59 | 0.41 | 28.46 | 0.25 |
| Rural/Not in Central City             | 71.11 | 0.26 | 69.41 | 0.41 | 71.54 | 0.25 |
| Northeast                             | 19.67 | 0.08 | 18.57 | 0.15 | 19.95 | 0.10 |
| Midwest                               | 23.15 | 0.16 | 23.52 | 0.32 | 23.05 | 0.21 |
| South                                 | 35.21 | 0.15 | 34.89 | 0.39 | 35.29 | 0.19 |
| West                                  | 21.97 | 0.11 | 23.02 | 0.23 | 21.71 | 0.15 |
| <b>Lifetime Psychiatric Disorders</b> |       |      |       |      |       |      |
| Axis I Disorders                      |       |      |       |      |       |      |
| Alcohol Use                           | 30.43 | 0.20 | 33.57 | 0.39 | 29.63 | 0.20 |
| Substance Use                         | 10.42 | 0.11 | 15.06 | 0.26 | 9.25  | 0.11 |
| Nicotine Dependence                   | 17.47 | 0.13 | 24.33 | 0.37 | 15.73 | 0.13 |
| Anxiety disorder                      | 17.88 | 0.17 | 31.00 | 0.34 | 14.55 | 0.17 |
| Mood disorder                         | 21.09 | 0.13 | 41.82 | 0.33 | 15.82 | 0.13 |
| Attention Deficit/Hyperactivity       | 2.51  | 0.06 | 5.82  | 0.19 | 1.67  | 0.05 |
| Axis II Disorders                     |       |      |       |      |       |      |
| Borderline                            | 5.89  | 0.08 | 18.44 | 0.28 | 2.70  | 0.07 |
| Schizotypal                           | 3.93  | 0.06 | 11.20 | 0.24 | 2.09  | 0.05 |
| Narcissistic                          | 6.18  | 0.08 | 11.88 | 0.23 | 4.74  | 0.08 |
| Avoidant                              | 2.32  | 0.05 | 6.14  | 0.17 | 1.36  | 0.05 |
| Antisocial                            | 3.63  | 0.07 | 5.86  | 0.21 | 3.07  | 0.07 |
| Dependent                             | 0.43  | 0.02 | 1.36  | 0.09 | 0.19  | 0.01 |
| Obsessive-Compulsive                  | 8.07  | 0.10 | 13.50 | 0.31 | 6.69  | 0.09 |
| Paranoid                              | 4.33  | 0.07 | 9.66  | 0.21 | 2.98  | 0.06 |
| Schizoid                              | 3.06  | 0.06 | 6.44  | 0.21 | 2.21  | 0.05 |
| Histrionic                            | 1.80  | 0.04 | 3.68  | 0.15 | 1.32  | 0.04 |

<sup>a</sup>The sampling weight variable in Wave 2 was used.

<sup>b</sup>Respondents in NESARC Wave 2 who reported low mood lasting two weeks or more during the three-year interval covered in the Wave 2 NESARC and were asked the three suicidal behavior questions.

<sup>c</sup>Respondents in NESARC Wave 2 who did not report low mood and were not asked the three suicidal questions.

Table 2: Weighted percentage of suicide related outcomes (SRO)<sup>a</sup> reported in Wave 2 by Wave 1 characteristics, and unadjusted and adjusted odds ratios for risk of Wave 2 SRO among persons reporting low mood at the NESARC Wave 2 interview. (N=7352)<sup>b</sup>

| Variable                             | n/N       | Weighted percentage of Wave 2 SRO | Standard error | OR <sup>c</sup> | 95% CI     | AOR <sup>d</sup> | 95% CI     |
|--------------------------------------|-----------|-----------------------------------|----------------|-----------------|------------|------------------|------------|
| <b>Smoking history</b>               |           |                                   |                |                 |            |                  |            |
| Current smoker in Wave 1             |           |                                   |                |                 |            |                  |            |
| Former Smoker in Wave 1              | 809/2217  | 35.73                             | 0.64           | 1.77            | 1.64, 1.90 | 1.41             | 1.28, 1.55 |
| Never Smoker in Wave 1               | 339/1280  | 26.68                             | 0.67           | 1.16            | 1.07, 1.25 | 1.32             | 1.21, 1.43 |
|                                      | 981/3855  | 23.94                             | 0.43           | 1.00            |            | 1.00             |            |
| <b>SRO in Wave 1</b>                 |           |                                   |                |                 |            |                  |            |
|                                      | 1009/1940 | 50.01                             | 0.76           | 3.84            | 3.60, 4.10 | 3.49             | 3.18, 3.84 |
| <b>Demographics</b>                  |           |                                   |                |                 |            |                  |            |
| <b>Sex</b>                           |           |                                   |                |                 |            |                  |            |
| Female                               | 1488/5090 | 28.51                             | 0.36           | 1.05            | 0.98, 1.12 | 1.13             | 1.04, 1.22 |
| Male                                 | 641/2262  | 27.54                             | 0.59           | 1.00            |            | 1.00             |            |
| <b>Race</b>                          |           |                                   |                |                 |            |                  |            |
| White                                | 1253/4295 | 28.38                             | 0.36           | 1.00            |            | 1.00             |            |
| Black                                | 333/1352  | 26.53                             | 0.70           | 0.91            | 0.84, 0.99 | 0.84             | 0.76, 0.92 |
| Hispanic                             | 438/1342  | 30.33                             | 0.52           | 1.10            | 1.04, 1.17 | 1.26             | 1.16, 1.36 |
| Asian/Pacific Islander               | 47/ 169   | 22.68                             | 0.84           | 0.74            | 0.67, 0.82 | 0.93             | 0.82, 1.06 |
| American Indian                      | 58/ 194   | 27.18                             | 2.81           | 0.94            | 0.71, 1.25 | 0.69             | 0.51, 0.92 |
| <b>Age</b>                           |           |                                   |                |                 |            |                  |            |
| Age 18-19                            | 94/ 264   | 36.65                             | 1.73           | 1.00            |            | 1.00             |            |
| Age 20-29                            | 410/1287  | 31.40                             | 0.67           | 0.83            | 0.69, 0.98 | 0.77             | 0.63, 0.94 |
| Age 30-44                            | 750/2438  | 29.32                             | 0.62           | 0.75            | 0.64, 0.88 | 0.73             | 0.60, 0.90 |
| Age 45-64                            | 679/2395  | 26.82                             | 0.63           | 0.66            | 0.56, 0.78 | 0.69             | 0.56, 0.84 |
| Age 65 and over                      | 196/ 968  | 20.90                             | 0.93           | 0.47            | 0.39, 0.57 | 0.68             | 0.54, 0.86 |
| <b>Marital status</b>                |           |                                   |                |                 |            |                  |            |
| Married                              | 836/3309  | 24.87                             | 0.49           | 1.00            |            | 1.00             |            |
| Cohabiting                           | 86/ 230   | 35.58                             | 1.67           | 1.67            | 1.42, 1.96 | 1.27             | 1.07, 1.51 |
| Widowed                              | 128/ 562  | 24.26                             | 1.09           | 0.97            | 0.85, 1.10 | 0.92             | 0.78, 1.07 |
| Divorced                             | 390/1104  | 36.01                             | 0.84           | 1.70            | 1.57, 1.84 | 1.20             | 1.10, 1.32 |
| Separated                            | 130/ 338  | 37.93                             | 1.78           | 1.85            | 1.58, 2.15 | 1.29             | 1.06, 1.56 |
| Never married                        | 559/2129  | 30.87                             | 0.69           | 1.35            | 1.24, 1.46 | 0.97             | 0.87, 1.09 |
| <b>Education</b>                     |           |                                   |                |                 |            |                  |            |
| Less than High School                | 440/1358  | 31.58                             | 0.92           | 1.17            | 1.04, 1.32 | 1.09             | 0.95, 1.25 |
| High School Diploma                  | 606/2111  | 28.27                             | 0.74           | 1.00            |            | 1.00             |            |
| Some College or more                 | 1083/3883 | 27.08                             | 0.35           | 0.94            | 0.87, 1.02 | 1.08             | 1.00, 1.17 |
| <b>Lifetime Psychiatric Disorder</b> |           |                                   |                |                 |            |                  |            |
| <b>Axis I Disorders</b>              |           |                                   |                |                 |            |                  |            |
| Alcohol Use                          | 811/2350  | 32.74                             | 0.60           | 1.40            | 1.31, 1.49 | 0.95             | 0.87, 1.04 |
| Substance Use                        | 427/1033  | 38.42                             | 0.94           | 1.75            | 1.61, 1.89 | 0.98             | 0.88, 1.09 |

|                                             |           |       |      |      |            |      |            |
|---------------------------------------------|-----------|-------|------|------|------------|------|------------|
| Anxiety                                     | 843/2278  | 37.57 | 0.60 | 1.72 | 1.62, 1.83 | 1.08 | 1.01, 1.17 |
| Mood                                        | 1217/3151 | 36.62 | 0.48 | 2.04 | 1.92, 2.17 | 0.77 | 0.70, 0.84 |
| Attention Deficit<br>Hyperactivity Disorder | 208/ 394  | 51.14 | 1.42 | 2.87 | 2.56, 3.22 | 1.56 | 1.36, 1.79 |
| Axis II Disorders                           |           |       |      |      |            |      |            |
| Borderline                                  | 821/1433  | 55.75 | 0.79 | 4.49 | 4.22, 4.77 | 2.91 | 2.69, 3.16 |
| Schizotypal                                 | 485/ 886  | 53.41 | 1.26 | 3.44 | 3.09, 3.84 | 1.50 | 1.31, 1.72 |
| Narcissistic                                | 443/ 993  | 42.49 | 1.01 | 2.08 | 1.89, 2.29 | 1.03 | 0.92, 1.14 |
| Avoidant                                    | 245/ 446  | 51.87 | 1.37 | 2.97 | 2.66, 3.32 | 1.29 | 1.05, 1.58 |
| Antisocial                                  | 188/ 395  | 41.55 | 1.39 | 1.89 | 1.68, 2.13 | 0.85 | 0.72, 1.01 |
| Dependent                                   | 58/ 90    | 56.90 | 2.90 | 3.44 | 2.74, 4.30 | 1.04 | 0.76, 1.41 |
| Ob-Com                                      | 377/ 961  | 36.07 | 1.05 | 1.53 | 1.39, 1.69 | 0.90 | 0.80, 1.00 |
| Paranoid                                    | 364/ 756  | 45.74 | 1.16 | 2.37 | 2.14, 2.62 | 0.95 | 0.82, 1.10 |
| Schizoid                                    | 210/ 473  | 43.81 | 1.26 | 2.10 | 1.89, 2.33 | 1.01 | 0.88, 1.16 |
| Histrionic                                  | 129/ 266  | 44.42 | 1.83 | 2.10 | 1.82, 2.43 | 0.76 | 0.63, 0.93 |

<sup>a</sup>SRO (Suicide related outcome: feel like want to die, suicide ideation, suicide attempt; 0=None, 1=any SRO).

<sup>b</sup>Missing observations for specific variables: Race – 43, Hispanic origin – 2, age – 13, marital status- 4, educational attainment – 70, household income-2544, unemployed – 28, Wave 2 individual suicide related outcomes – 12-18 “unknown” changed to “no”. Treatment of unknown values in determination of psychiatric diagnosis variables is known only to original NESARC project staff at NIAAA.

<sup>c</sup>Odds Ratios (OR) and 95% confidence intervals (CI) based on simple regression models estimating Wave 2 SRO as a function of an individual predictor variable.

<sup>d</sup>Adjusted Odds Ratios (AOR) and 95% CI based on a multiple logistic regression estimating Wave 2 SRO as a function of age, sex, race/ethnicity, marital status, income, education, unemployed status, Census region, urban residence, smoking status, Axis I and Axis II disorders (as described in text), and lifetime SRO prior to Wave 1.

Table 3: Effects on Wave 2 suicide related outcomes (SRO) according to smoking status change as reported in NESARC Wave 1 and Wave 2 interviews.

| Smoking status in Wave 1 to Wave 2                                          | n/N                 | Weighted percentage <sup>b</sup><br>(standard error) | Wave 2 SRO <sup>a</sup> |            |
|-----------------------------------------------------------------------------|---------------------|------------------------------------------------------|-------------------------|------------|
|                                                                             |                     |                                                      | AOR <sup>c</sup>        | 95% CI     |
| 1. Consistent never smoker (in Wave 1 and Wave 2)                           | 897/3653            | 47.8<br>(0.40)                                       | 1.00                    |            |
| 2. Long-term former smoker (in Wave 1 and Wave 2)                           | 293/1185            | 16.4<br>(0.26)                                       | 1.22                    | 1.12, 1.34 |
| 3. Recent former smoker (current smoker in Wave 1, former smoker in Wave 2) | 126/393             | 5.3<br>(0.14)                                        | 1.37                    | 1.16, 1.63 |
| 4. Persistent current smoker (in Wave 1 and Wave 2)                         | 683/1824            | 26.3<br>(0.35)                                       | 1.50                    | 1.35, 1.66 |
| 5. New current smoker (never smoker in Wave 1, current smoker in Wave 2)    | 82/194              | 2.6<br>(0.10)                                        | 1.82                    | 1.51, 2.19 |
| 6. Relapser (former smoker in Wave 1, current smoker in Wave 2)             | 46/95               | 1.5<br>(0.08)                                        | 3.42                    | 2.85, 4.11 |
|                                                                             | N=7352 <sup>d</sup> |                                                      |                         |            |

<sup>a</sup>Any of three items: want to die, suicidal ideation, suicide attempt

<sup>b</sup>The sampling weight variable in Wave 2 was used.

<sup>c</sup>AORs are adjusted odds ratio with 95% confidence intervals (CI) based on multiple logistic regression of Wave 2 SRO as a function of age, sex, race/ethnicity, marital status, income, education, unemployed status, Census region, urban residence, smoking status, Axis I and Axis II disorders (as described in text), and lifetime SRO reported in Wave 1.

<sup>d</sup>The seventh group (n=8), which consisted of persons who were never smokers in Wave 1, began to smoke and then stopped smoking in Wave 2, was too small for a valid assessment of risk.

Table 4: Combined effects of smoking status and prior SRO<sup>a</sup> reported in Wave 1  
on a) Wave 2 SRO and b) Wave 2 current smoking

| Wave 1 Smoking status and Wave 1 SRO       | n/N         | Weighted percentages (standard error) | AOR <sup>b</sup> | 95% CI            |
|--------------------------------------------|-------------|---------------------------------------|------------------|-------------------|
| <b>a) Effect on Wave 2 SRO</b>             |             |                                       |                  |                   |
| Never smoker - No prior SRO (referent)     | 550 / 2978  | 17.5 (0.4)                            | 1.00             | N.A. <sup>c</sup> |
| Never smoker - Prior SRO                   | 431 / 877   | 46.8 (1.0)                            | 4.12             | 3.65, 4.64        |
| Former smoker - No prior SRO               | 187 / 968   | 20.6 (0.8)                            | 1.42             | 1.28, 1.57        |
| Former smoker - Prior SRO                  | 152 / 312   | 48.2 (1.6)                            | 4.58             | 3.60, 5.82        |
| Current smoker - No prior SRO              | 383 / 1466  | 26.6 (0.7)                            | 1.56             | 1.41, 1.74        |
| Current smoker - Prior SRO                 | 426 / 751   | 54.1 (1.2)                            | 4.77             | 3.70, 5.87        |
| <b>b) Effect on Wave 2 Current smoking</b> |             |                                       |                  |                   |
| Never smoker – No prior SRO (referent)     | 166 / 2978  | 5.3 (0.2)                             | 1.00             | N.A. <sup>c</sup> |
| Never smoker – Prior SRO                   | 28 / 877    | 4.3 (0.4)                             | 0.70             | 0.60, 0.82        |
| Former smoker – No prior SRO               | 71 / 968    | 8.6 (0.5)                             | 2.20             | 1.77, 2.31        |
| Former smoker – Prior SRO                  | 24 / 312    | 6.9 (0.6)                             | 1.15             | 0.83, 1.61        |
| Current smoker – No prior SRO              | 1204 / 1466 | 82.7 (0.5)                            | 82.9             | 73.7, 93.2        |
| Current smoker – Prior SRO                 | 620 / 751   | 84.2 (0.8)                            | 77.0             | 57.6, 104.8       |

<sup>a</sup>Any of three items: want to die, suicidal ideation, suicide attempt

<sup>b</sup>AORs are adjusted odds ratios with 95% confidence intervals (CI) based on multiple logistic regression models controlling for demographics and psychiatric history at Wave 1 (shown in Table 1).

<sup>c</sup>Not applicable

STROBE Statement—Checklist of items that should be included in reports of *cohort studies*

|                              | Item No | Recommendation                                                                                                                                                                                                                                                                                                                                                                                                |
|------------------------------|---------|---------------------------------------------------------------------------------------------------------------------------------------------------------------------------------------------------------------------------------------------------------------------------------------------------------------------------------------------------------------------------------------------------------------|
| <b>Title and abstract</b>    | 1       | (a) Indicate the study's design with a commonly used term in the title or the abstract<br>(b) Provide in the abstract an informative and balanced summary of what was done and what was found                                                                                                                                                                                                                 |
| <b>Introduction</b>          |         |                                                                                                                                                                                                                                                                                                                                                                                                               |
| Background/rationale         | 2       | Explain the scientific background and rationale for the investigation being reported                                                                                                                                                                                                                                                                                                                          |
| Objectives                   | 3       | State specific objectives, including any prespecified hypotheses                                                                                                                                                                                                                                                                                                                                              |
| <b>Methods</b>               |         |                                                                                                                                                                                                                                                                                                                                                                                                               |
| Study design                 | 4       | Present key elements of study design early in the paper                                                                                                                                                                                                                                                                                                                                                       |
| Setting                      | 5       | Describe the setting, locations, and relevant dates, including periods of recruitment, exposure, follow-up, and data collection                                                                                                                                                                                                                                                                               |
| Participants                 | 6       | (a) Give the eligibility criteria, and the sources and methods of selection of participants. Describe methods of follow-up<br>(b) For matched studies, give matching criteria and number of exposed and unexposed                                                                                                                                                                                             |
| Variables                    | 7       | Clearly define all outcomes, exposures, predictors, potential confounders, and effect modifiers. Give diagnostic criteria, if applicable                                                                                                                                                                                                                                                                      |
| Data sources/<br>measurement | 8*      | For each variable of interest, give sources of data and details of methods of assessment (measurement). Describe comparability of assessment methods if there is more than one group                                                                                                                                                                                                                          |
| Bias                         | 9       | Describe any efforts to address potential sources of bias                                                                                                                                                                                                                                                                                                                                                     |
| Study size                   | 10      | Explain how the study size was arrived at                                                                                                                                                                                                                                                                                                                                                                     |
| Quantitative variables       | 11      | Explain how quantitative variables were handled in the analyses. If applicable, describe which groupings were chosen and why                                                                                                                                                                                                                                                                                  |
| Statistical methods          | 12      | (a) Describe all statistical methods, including those used to control for confounding<br>(b) Describe any methods used to examine subgroups and interactions<br>(c) Explain how missing data were addressed<br>(d) If applicable, explain how loss to follow-up was addressed<br>(e) Describe any sensitivity analyses                                                                                        |
| <b>Results</b>               |         |                                                                                                                                                                                                                                                                                                                                                                                                               |
| Participants                 | 13*     | (a) Report numbers of individuals at each stage of study—eg numbers potentially eligible, examined for eligibility, confirmed eligible, included in the study, completing follow-up, and analysed<br>(b) Give reasons for non-participation at each stage<br>(c) Consider use of a flow diagram                                                                                                               |
| Descriptive data             | 14*     | (a) Give characteristics of study participants (eg demographic, clinical, social) and information on exposures and potential confounders<br>(b) Indicate number of participants with missing data for each variable of interest<br>(c) Summarise follow-up time (eg, average and total amount)                                                                                                                |
| Outcome data                 | 15*     | Report numbers of outcome events or summary measures over time                                                                                                                                                                                                                                                                                                                                                |
| Main results                 | 16      | (a) Give unadjusted estimates and, if applicable, confounder-adjusted estimates and their precision (eg, 95% confidence interval). Make clear which confounders were adjusted for and why they were included<br>(b) Report category boundaries when continuous variables were categorized<br>(c) If relevant, consider translating estimates of relative risk into absolute risk for a meaningful time period |

|    |                          |    |                                                                                        |
|----|--------------------------|----|----------------------------------------------------------------------------------------|
| 1  | Other analyses           | 17 | Report other analyses done—eg analyses of subgroups and interactions, and              |
| 2  |                          |    | sensitivity analyses                                                                   |
| 3  | <b>Discussion</b>        |    |                                                                                        |
| 4  | Key results              | 18 | Summarise key results with reference to study objectives                               |
| 5  | Limitations              | 19 | Discuss limitations of the study, taking into account sources of potential bias or     |
| 6  |                          |    | imprecision. Discuss both direction and magnitude of any potential bias                |
| 7  | Interpretation           | 20 | Give a cautious overall interpretation of results considering objectives, limitations, |
| 8  |                          |    | multiplicity of analyses, results from similar studies, and other relevant evidence    |
| 9  | Generalisability         | 21 | Discuss the generalisability (external validity) of the study results                  |
| 10 | <b>Other information</b> |    |                                                                                        |
| 11 | Funding                  | 22 | Give the source of funding and the role of the funders for the present study and, if   |
| 12 |                          |    | applicable, for the original study on which the present article is based               |
| 13 |                          |    |                                                                                        |
| 14 |                          |    |                                                                                        |
| 15 |                          |    |                                                                                        |
| 16 |                          |    |                                                                                        |

17 \*Give information separately for exposed and unexposed groups.

18  
19  
20 **Note:** An Explanation and Elaboration article discusses each checklist item and gives methodological background and  
21 published examples of transparent reporting. The STROBE checklist is best used in conjunction with this article (freely  
22 available on the Web sites of PLoS Medicine at <http://www.plosmedicine.org/>, Annals of Internal Medicine at  
23 <http://www.annals.org/>, and Epidemiology at <http://www.epidem.com/>). Information on the STROBE Initiative is  
24 available at <http://www.strobe-statement.org>.  
25  
26  
27  
28  
29  
30  
31  
32  
33  
34  
35  
36  
37  
38  
39  
40  
41  
42  
43  
44  
45  
46  
47  
48  
49  
50  
51  
52  
53  
54  
55  
56  
57  
58  
59  
60



**Smoking and suicidal behaviors in a sample of US adults  
with low mood:  
a retrospective analysis of longitudinal data**

|                                 |                                                                                                                                                                                                                                                                                                                      |
|---------------------------------|----------------------------------------------------------------------------------------------------------------------------------------------------------------------------------------------------------------------------------------------------------------------------------------------------------------------|
| Journal:                        | <i>BMJ Open</i>                                                                                                                                                                                                                                                                                                      |
| Manuscript ID:                  | bmjopen-2012-000876.R3                                                                                                                                                                                                                                                                                               |
| Article Type:                   | Research                                                                                                                                                                                                                                                                                                             |
| Date Submitted by the Author:   | 15-May-2012                                                                                                                                                                                                                                                                                                          |
| Complete List of Authors:       | Covey, Lirio; Columbia University, Psychiatry; New York State Psychiatric Institute, Clinical Therapeutics<br>Berlin, Ivan; Hôpital Pitié-Salpêtrière-Université P&M Curie, Faculté de médecine, Pharmacology<br>Hu, Mei-Chen; Columbia University Medical Center, Psychiatry<br>Hakes, Jahn; U.S. Bureau of Census, |
| <b>Primary Subject Heading</b>: | Smoking and tobacco                                                                                                                                                                                                                                                                                                  |
| Secondary Subject Heading:      | Addiction, Mental health                                                                                                                                                                                                                                                                                             |
| Keywords:                       | Suicide & self-harm < PSYCHIATRY, Adult psychiatry < PSYCHIATRY, Epidemiology < TROPICAL MEDICINE                                                                                                                                                                                                                    |
|                                 |                                                                                                                                                                                                                                                                                                                      |

SCHOLARONE™  
Manuscripts



1  
2  
3  
4  
5  
6 **Smoking and suicidal behaviors in a sample of US adults with low mood:**  
7  
8  
9 **a retrospective analysis of longitudinal data**  
10

11 **Lirio S. Covey<sup>a</sup>, Ivan Berlin<sup>b</sup>, Mei-Chen Hu<sup>c</sup>, Jahn K. Hakes<sup>d</sup>**  
12

- 13  
14  
15  
16  
17 a) New York State Psychiatric Institute, Department of Psychiatry, Columbia University,  
18 1051 Riverside Drive, New York, NY 10032, United States  
19  
20  
21 b) Département de Pharmacologie, Hôpital Pitié-Salpêtrière-Assistance publique-Hôpitaux  
22 de Paris-Faculté de médecine, Université P.& M. Curie - INSERM U894, 47,bd de  
23 l'Hôpital, 75013 Paris, France  
24  
25  
26  
27 c) Department of Psychiatry, Columbia University Medical Center, 1051 Riverside Drive,  
28 New York, NY 10032, United States  
29  
30  
31  
32 d) Center for Administrative Records Research and Applications, U.S. Census Bureau, 4700  
33 Silver Hill Rd., Suitland, MD 20746, United States  
34  
35  
36  
37  
38  
39  
40  
41  
42  
43  
44  
45  
46  
47  
48  
49  
50  
51  
52  
53  
54

55 Corresponding author: Lirio S. Covey, New York State Psychiatric Institute, Department of  
56 Psychiatry, Columbia University, 1051 Riverside Drive, New York, NY 10032, United States. E-  
57 mail: lsc3@columbia.edu  
58  
59  
60

**ABSTRACT**

**Objective:** To investigate whether: 1) smoking predicts suicide related outcomes (SRO); 2) prior SRO predicts smoking, 3) smoking abstinence affects the risk of SRO, 4) psychiatric comorbidity modifies the relationship between smoking and SRO.

**Design:** Retrospective analysis of longitudinal data obtained in Wave 1 (2001-2002) and Wave 2 (2004-2005) of the National Epidemiologic Survey of Alcohol and Related Conditions.

**Setting:** Face-to-face interviews conducted with persons in the community.

**Participants:** US adults (N=43,093) aged 18 years or older were interviewed in Wave 1 and re-interviewed (N=34,653) three years later. For the present study, the sample was the subset of persons (N=7,352) who at the Wave 2 interview reported low mood lasting two weeks or more during the past three years and were further queried regarding SRO occurring between Waves 1 and 2.

**Outcome measures:** SRO composed of any of: 1) want to die, 2) suicidal ideation, 3) suicide attempt, reported at Wave 2. Current smoking reported at Wave 2.

**Results:** Current and former smoking in Wave 1 predicted increased risk for Wave 2 SRO independently of prior SRO, psychiatric history, and socio-demographic characteristics measured in Wave 1 (Adjusted Odds Ratio (AOR) =1.41, 95% CI=1.28 to 1.55 for current smoking; AOR=1.32, 95% CI=1.21 to 1.43 for former smoking). Prior SRO did not predict current smoking in Wave 2. Compared with persistent never smokers, risk for future SRO was highest among relapsers (AOR=3.42, 95% CI=2.85 to 4.11); next highest among smoking beginners at Wave 2 (AOR=1.82, 95% CI=1.51 to 2.19); and lowest among long-term (four+ years) former smokers (AOR=1.22, 95% CI=1.12 to 1.34). Compared with persistent current

1  
2  
3 smokers, risk for SRO was lower among long-term ( $p<0.0001$ ), but not shorter-term ( $p=0.26$ )  
4  
5 abstainers.  
6

7  
8 **Conclusion:** Smoking increased the risk of future SRO independently of psychiatric  
9  
10 comorbidity. Abstinence of several years duration reduced that risk.  
11

12 **Word count= 298**  
13  
14  
15  
16  
17  
18  
19  
20  
21  
22  
23  
24  
25  
26  
27  
28  
29  
30  
31  
32  
33  
34  
35  
36  
37  
38  
39  
40  
41  
42  
43  
44  
45  
46  
47  
48  
49  
50  
51  
52  
53  
54  
55  
56  
57  
58  
59  
60

For peer review only

## Article Summary

### Article focus

To investigate among persons reporting low mood lasting two weeks or more during the past three years whether:

- smoking predicts suicide related outcomes (want to die, suicidal ideation, suicide attempt); prior suicide related outcomes predict smoking,
- smoking abstinence affects the risk of suicide related outcomes,
- psychiatric comorbidity modifies the relationship between smoking and suicide related outcomes.

### Key messages

- Current and former smoking (less than 4 years' reported abstinence) predicted increased risk for suicide related outcomes independently of prior suicide related outcomes, psychiatric history, and socio-demographic characteristics.
- Prior suicide related outcomes did not predict future current smoking.
- Compared with persistent current smokers, risk of suicide related outcomes was reduced with long-term ( $\geq 4$  years) but not with shorter-term ( $< 4$  years) abstinence.

### Strengths and limitations

#### *Strengths*

- Face-to-face interviews, a longitudinal design, a large representative sample, a validated diagnostic instrument, a comprehensive range of putative predictors that permitted statistical control of the key background factors and comorbidities.

#### *Limitations*

- Only persons with self-reported low mood were questioned about suicide related outcomes; consequently, no generalizability to other populations.
- The sample did not include persons who had completed suicide.
- No assessment of the effects of medical conditions which are possibly causally related to smoking and to suicide related outcomes.
- Smoking information was self-reported, not biologically verified.
- No information from adolescents, a high risk population for both smoking and suicide related outcomes.

## INTRODUCTION

Suicide is a leading cause of death worldwide. Close to one million persons die from suicide each year. The World Health Organization predicts that by 2020 suicide deaths will rise to 1.5 million (1). Completed suicides are largely predicted by the wish to die, thoughts of suicide, and unsuccessful previous suicidal attempts (2), making it important to understand the risks posed by suicide related outcomes (SRO). A history of mental disorders (3-5) and particular demographic characteristics (female gender, younger age, unmarried status, and unemployment) are putative risk factors for suicide and SRO (2). Smoking, long known as a major risk factor for numerous medical illnesses (6), and recently, for psychiatric outcomes as well (7, 8) has received increasing attention for its potential contribution to the risk of completed suicides and SRO (9). Nevertheless, whether the association between smoking and suicidal behaviours is causal or correlational remains unclear.

A link between smoking and suicide was observed as early as 1976 by Doll and Peto in their study of mortality due to smoking in male British doctors (10). Clinical and epidemiological studies that subsequently investigated the issue are in general, but not universal, agreement in finding a significant association between smoking and suicide and suicidal behaviors. Among studies that focused on SRO, three that used cross-sectional epidemiological data found a positive correlational association between smoking and SRO (11-13). Of seven longitudinal studies that also utilized community-based data, three (14-16) found that current smoking predicted suicidal behaviors even after controlling for the effects of demographic and psychiatric variables; four studies did not find a positive relationship (17-20).

1  
2  
3 The effect of smoking abstinence on risk of SRO is also unclear. A study of young adults  
4 followed for 10 years found that recent, but not pre-survey, cigarette smoking predicted suicidal  
5 thoughts and attempts (14). Another study showed higher incidence rates of suicidal ideation  
6 among former smokers than never smokers, but the difference was no longer significant after  
7 adjustment with depressive disorder, anxiety symptoms, and alcohol dependence (16). A study  
8 based on Wave 1 data from the National Epidemiological Survey of Alcohol and Related  
9 Conditions (NESARC) initially found that longer duration of abstinence decreased risk for SRO,  
10 but this effect disappeared upon controlling for psychiatric comorbidity (21).  
11  
12  
13  
14  
15  
16  
17  
18  
19  
20  
21

22 A further question of theoretical and practical importance is whether prior SRO increases  
23 the risk of future smoking. In the single study that has addressed this question, longitudinal data  
24 obtained from adolescents showed that smoking predicted suicidal ideation and suicide attempts  
25 but prior suicidality was not associated with subsequent smoking (15).  
26  
27  
28  
29  
30  
31

32 The present study was conducted to address these conundrums of the smoking-suicide  
33 relationship: 1) whether prior smoking predicts SRO; 2) whether prior SRO predicts smoking; 3)  
34 whether smoking cessation and its corollary, duration of smoking abstinence, affects risk for  
35 SRO, and 4) whether these relationships are independent of comorbid psychiatric illness. Also  
36 explored were the effects of smoking status changes between the two waves of the NESARC on  
37 risk of future SRO. The two-wave format, the large sample, and extensive data on psychiatric  
38 comorbidity that characterized the NESARC (22) permitted assessment of these questions.  
39  
40  
41  
42  
43  
44  
45  
46  
47

48 The survey instrument had asked questions regarding the past occurrence of SRO – want  
49 to die, suicidal ideation, and suicide attempt, only of persons reporting low mood. This  
50 restriction limits the generalizability of findings to the general population, but the much higher  
51  
52  
53  
54  
55  
56  
57  
58  
59  
60

1  
2  
3 occurrence of suicidal behaviours among persons with low mood (3, 4) provided a more  
4  
5 sensitive context for detecting the risk potential of smoking for suicidal behaviours (23).  
6  
7  
8  
9

## 10 METHODS

11  
12 Sample: The NESARC data were collected to obtain a representative national sample of  
13 US adults. In Wave 1 (2001-2002), face-to-face interviews were completed with 43,093 persons  
14 aged 18 years or older. The overall response rate was 81.0%. The Wave 1 sample was re-  
15 interviewed in Wave 2 (2004-2005) three years later (mean interval=36.6 months, s.e.=2.62)  
16 with a response rate of 80.4% (N=34,653) based on the Wave 1 sample. The NESARC sample  
17 size was chosen to be sufficiently large to produce nationally representative proportions for the  
18 study of substance abuse and dependence and mental disorders by demographic group with  
19 confidence intervals equal to or smaller than extant studies. Following NESARC guidelines (24,  
20 25), the original NESARC data set was transformed to account for survey design effects and  
21 sampling weights upon responses in order to adjust for sample selection procedures, non-  
22 response from selected households or individuals, oversampling (of young adults, Blacks, and  
23 Hispanics), and non-response at the Wave 2 time point. Those weights and survey design effects,  
24 employed in other studies based on NESARC data, as well as other methodological details of  
25 Waves 1 and 2 are described in published NESARC Source and Accuracy Statements (24, 25).  
26  
27  
28  
29  
30  
31  
32  
33  
34  
35  
36  
37  
38  
39  
40  
41  
42  
43  
44

45 Data for the present study were obtained from a subset of persons (N=7,352) who  
46 reported low mood at the Wave 2 interview, irrespective of low mood in Wave 1. This  
47 subsample was selected for the present analysis because it produced the largest number of  
48 persons from whom evaluable information for predicting Wave 2 SRO was available. The latter  
49 subsample is also referred to herein as the “at-risk sample”. Persons who did not report low  
50  
51  
52  
53  
54  
55  
56  
57  
58  
59  
60



1  
2  
3 mood were skipped out of the SRO sections in Waves 1 and 2. The questions for low mood at the  
4  
5 Wave 2 interview were: “Since your LAST interview in (month/year), have you ever had a time  
6  
7 when you felt sad, blue, depressed, or down most of the time for at least 2 weeks?” and “Since  
8  
9 your LAST interview, have you ever had a time, lasting at least 2 weeks, when you didn’t care  
10  
11 about the things that you usually cared about, or when you didn’t enjoy the things you usually  
12  
13 enjoyed?” At the Wave 1 interview, respondents were asked these same questions referenced to  
14  
15 their *entire lifetime*.  
16  
17  
18  
19

20 Variables: The outcome variables for this study were Wave 2 SRO and Wave 2 current  
21  
22 smoking. The main covariates were prior SRO and smoking status at Wave 1. The individual  
23  
24 SRO questions are: “During that time when (your mood was at its [sic] lowest/you enjoyed or  
25  
26 cared the least about things), did you ... feel like you wanted to die? think about committing  
27  
28 suicide? attempt suicide?” Responses to these items were summed to create the total SRO  
29  
30 question and measured as a dichotomous variable (none of the three=0; any of the three=1).  
31  
32 Respondents who did not report low mood in Wave 1 and were not asked the SRO questions  
33  
34 were assigned a value of 0 for prior SRO.  
35  
36  
37  
38

39 The questions on tobacco use at Wave 1 are: “In your ENTIRE LIFE, have you ever . . .  
40  
41 (a) Smoked at least 100 cigarettes? (b) Smoked at least 50 cigars? (c) Smoked a pipe at least 50  
42  
43 times? (d) Used snuff, such as Skoal, Skoal Bandit [sic] or Copenhagen at least 20 times? (e)  
44  
45 Used chewing tobacco, such as Redman, Levi Garrett or Beechnut at least 20 times?” Persons  
46  
47 who smoked cigarettes, cigars and/or pipes, comprised (a weighted) 95.9% (3368/3497) of all  
48  
49 tobacco users. Following the coding rule of the NESARC, all tobacco users, including the 129  
50  
51 persons who reported using snuff or chewing tobacco only, were labelled as “smokers”. A *never*  
52  
53 *smoker* had responded “No” to each of the questions regarding lifetime use of at least 100  
54  
55  
56  
57  
58  
59  
60

1  
2  
3 cigarettes, at least 50 cigars, smoked a pipe at least 50 times, used snuff at least 20 times, and  
4  
5 used chewing tobacco at least 20 times. A *former smoker* was a “Yes” responder to at least one  
6  
7 of the prior questions who also reported that he or she had not smoked or used tobacco in the  
8  
9 past 12 months. (N.B. Very few, if any, of this latter group would have been experiencing  
10  
11 withdrawal; thus, the current study is not an adequate test of post-cessation withdrawal as a  
12  
13 predictor of SRO). A *current smoker* was a “Yes” respondent who had smoked or used tobacco  
14  
15 within the past 12 months. At the Wave 2 interview, these same questions on tobacco use were  
16  
17 asked with regard to the period since the last interview (month/year).  
18  
19  
20  
21

22 The smoking status variable (i.e., never, former, current) rather than DSM-IV defined  
23  
24 nicotine dependence was selected to assess tobacco use because: 1) the adequacy of the DSM-IV  
25  
26 criteria as a valid measure of nicotine dependence remains controversial (26, 27), and 2)  
27  
28 response to the single question on smoking status is easier to elicit in the clinical setting, with  
29  
30 more validity, than responses to a multi-item measure of tobacco use for which no consensus,  
31  
32 stand-alone, instrument yet exists (26, 27). To categorize long-term or recent status as never,  
33  
34 former, or current smokers, a change variable was created with the following categories  
35  
36 according to their report of smoking at Waves 1 and 2: 1) never smoker to never smoker, 2)  
37  
38 former smoker to former smoker, 3) current smoker to former smoker, 4) current smoker to  
39  
40 current smoker, 5) never smoker to current smoker, 6) former smoker to current smoker, and 7)  
41  
42 never smoker to former smoker.  
43  
44  
45  
46  
47

48 Other potential confounders or effect modifiers because of their known correlations with  
49  
50 smoking and/or SRO, measured at Wave 1, were: demographic characteristics (age, gender,  
51  
52 race/ethnicity, marital status, education, employment status, income, urban residence, geographic  
53  
54 region), and lifetime measures of DSM-IV Axis I and Axis II disorders. The Axis I disorders  
55  
56  
57  
58  
59  
60

1  
2  
3 were categorized into mood disorders (major depression, dysthymia, bipolar I and bipolar II),  
4  
5 anxiety disorders (panic disorder, social phobia, specific phobia, generalized anxiety), alcohol  
6  
7 use disorders (alcohol abuse or dependence), and other substance use disorders (drug abuse or  
8  
9 dependence). A history of Attention Deficit Hyperactivity Disorder (ADHD), queried only at  
10  
11 Wave 2, was used among the Wave 1 predictors, its lifetime quality presumed since the DSM-IV  
12  
13 criteria for ADHD include the presence of ADHD symptoms before age seven. All ten of the  
14  
15 Axis II personality disorders measured in AUDADIS-IV (shown in Table 1), measured at Wave  
16  
17 1, were included as well.

21  
22       Assessment: For both Waves 1 and 2, the Alcohol Use Disorder and Associated  
23  
24 Disabilities Interview Schedule (AUDADIS-IV) was administered by interviewers from the U.S.  
25  
26 Census Bureau. The reliability and validity of the DSM-IV diagnoses obtained through the  
27  
28 AUDADIS-IV have been demonstrated in clinical and general samples in the U.S. and in other  
29  
30 countries (28).

34  
35       Statistical Analysis: Weighted percentages and standard errors measured the distribution  
36  
37 of the covariates (demographic characteristics and lifetime psychiatric variables) reported at  
38  
39 Wave 1 for the sample with low mood and for the complementary sample of persons with no low  
40  
41 mood. Chi-squared tests were used to assess differences between comparison groups, e.g., the at-  
42  
43 risk sample and the complementary sample of NESARC participants who did not report low  
44  
45 mood. Unadjusted and adjusted odds ratios (OR and AOR) and 95% confidence intervals (CI)  
46  
47 were calculated from univariate logistic regressions and multivariate logistic regressions,  
48  
49 respectively, to assess prediction of Wave 2 SRO in the sample of persons reporting low mood.  
50  
51 respectively. The incidence of SRO at Wave 2 (since the Wave 1 interview) by smoking status,  
52  
53 prior SRO, and all other covariates at Wave 1, were also calculated. The opposite temporal  
54  
55  
56  
57  
58  
59  
60

1  
2  
3 relationship of prior SRO (reported in Wave 1) on future current smoking (reported in Wave 2)  
4 was tested using the identical covariates for assessing predictors of Wave 2 SRO, following  
5 Granger (29). All models were estimated with the PROC SURVEYLOGISTIC function of SAS  
6 statistical software version 9.2, with the results verified through an internal statistical review at  
7 the U.S. Census Bureau.  
8  
9

10  
11  
12  
13  
14  
15 Missing values were replaced through imputation using assignment and allocation  
16 methods as described in the NESARC Source and Accuracy Statements (24, 25). Sensitivity  
17 analyses were performed that included: comparison of the at-risk subsample to the  
18 complementary Wave 2 NESARC sample; using different sets of control variables with and  
19 without education, and census region; and including help-seeking behavior controls. In response  
20 to reviewer concerns, we performed the multiple logistic regression models for assessing  
21 prediction of Wave 2 SRO and of Wave 2 current smoking based on the unweighted data  
22 adjusted for design effects. These various sensitivity analyses did not alter the associations  
23 between smoking and SRO reported below.  
24  
25  
26  
27  
28  
29  
30  
31  
32  
33  
34  
35  
36  
37  
38

## 39 RESULTS

### 40 *Wave 1 Characteristics*

41  
42  
43 Table 1 shows weighted percentages by smoking status, SRO taken together and  
44 individually, demographic characteristics, and psychiatric disorders (DSM-IV Axis I and Axis II)  
45 in the sample of persons reporting low mood at Wave 1 and the rest of the NESARC sample.  
46 Current smoking, SRO, and the prevalence of psychiatric disorders were markedly higher among  
47 the low mood sample, confirming their at-risk status. Other demographic characteristics  
48 previously associated with higher risk of suicide and SROs were also higher in the low mood  
49  
50  
51  
52  
53  
54  
55  
56  
57  
58  
59  
60

1  
2  
3 subsample: more females, more low and fewer high income responders, fewer married, and more  
4  
5 separated or never married, and more unemployed individuals. Differences by race/ethnicity,  
6  
7 age, urban or rural residence, and geographic area were also observed.  
8  
9

### 10 11 12 *Effects of Wave 1 characteristics on Wave 2 SRO*

13  
14  
15 From here on, reported statistics are for the sample of persons reporting low mood at  
16  
17 Wave 2. The overall incidence rate of SRO (occurring between the Wave 1 and Wave 2  
18  
19 interviews) was 28.2% (s.e.=0.33%). Table 2 shows weighted percentages and odds ratios for  
20  
21 Wave 2 SRO by smoking history, prior SRO, and the control variables as reported in Wave 1.  
22  
23 Unadjusted odds ratios (OR) and 95% CI for future SRO are shown as reference points. The  
24  
25 adjusted odds ratios (AOR) and 95% CI show significantly higher risk of Wave 2 SRO for both  
26  
27 Wave 1 current smokers (AOR=1.41, 95% CI= 1.28, 1.55) and former smokers (AOR=1.32,  
28  
29 95% CI=1.21, 1.43) relative to never smokers. The difference in point estimates of risk between  
30  
31 current versus former smokers was not significant ( $\chi^2=1.95$ ,  $p = 0.16$ ).  
32  
33  
34  
35

36  
37 The multivariate model showed that SRO in Wave 1 is the strongest predictor of a Wave  
38  
39 2 SRO (AOR=3.49, 95% CI= 3.18, 3.84). Significant, independent risk of future SRO was also  
40  
41 observed for individuals who were female, Hispanic, younger, cohabiting, divorced or separated,  
42  
43 of lower income, unemployed, and resided outside the Northeast region. Of the DSM-IV Axis I  
44  
45 disorders, only anxiety (AOR= 1.08, 95% CI=1.01, 1.17) and ADHD (AOR=1.56, 95% CI=1.36,  
46  
47 1.79) showed significantly elevated risk of Wave 2 SRO; mood disorder was correlated with  
48  
49 reduced Wave 2 SRO risk (AOR=0.77; 95% CI=0.70, 0.84). Three of the DSM-IV Axis II  
50  
51 disorders, i.e., borderline personality, schizotypal, and avoidant personality, showed significantly  
52  
53 increased risk for Wave 2 SRO.  
54  
55  
56  
57  
58  
59  
60

1  
2  
3  
4  
5  
6 *Smoking status change from Wave 1 to Wave 2*  
7

8 The great majority of the sample (90.5%) did not change their smoking status as never,  
9 former, or current smoker, between Waves 1 and 2 (Table 3). Among the remaining 9.5%, over  
10 half (5.3%) had shifted from being current smokers to former smokers; more than a fourth  
11 (2.6%) were never smokers in Wave 1 who became current smokers in Wave 2; and a smaller  
12 proportion (<2%) who were former smokers in Wave 1 relapsed to smoking in Wave 2.  
13  
14  
15  
16  
17  
18

19 a) *Effects on Wave 2 SRO.* Table 3 shows adjusted odds ratios indicating significant  
20 risk for SRO among all categories of ever-smokers relative to the persistent never smokers. The  
21 highest risk was seen for relapsers (former smoker to current smoker) (AOR=3.42, 95%  
22 CI=2.85, 4.11); new smokers (never smoker to current smoker) showed the next highest risk  
23 (AOR=1.82, 95% CI=1.51, 2.19); and long-term former smokers (during both Wave 1 and 2 )  
24 showed the least elevated, yet still significant, risk (AOR=1.22, 95% CI=1.12, 1.34). The  
25 seventh category consisting of never smokers in Wave 1 who reported former smoker status in  
26 Wave 2 was too small for a valid analysis.  
27  
28  
29  
30  
31  
32  
33  
34  
35  
36  
37

38 b) *Comparative risks by abstinence duration, relapse, and new smoking.* Pair-wise  
39 chi-squared tests for equality of coefficients permitted a comparison of risk estimates for Wave  
40 2 SRO (shown in Table 3) between categories of smoking status change. Given the three-year  
41 interval between Waves 1 and 2 and the coding requirement that former smoking status is  
42 assigned only upon reporting of at least 12 months of abstinence, long-term former smokers  
43 (Category 2, Table 3) would have been abstinent for at least four years. Persons who shifted  
44 from current smoking in Wave 1 to former smoking in Wave 2 (Category 3, Table 3) would  
45 have been abstinent for at least 12 months and a maximum of four years.  
46  
47  
48  
49  
50  
51  
52  
53  
54  
55  
56  
57  
58  
59  
60

1  
2  
3 The analysis showed that the AOR for Wave 2 SRO among recent former smokers  
4  
5 (Category 3) did not differ from persistent current smokers (Category 4) ( $\chi^2(1) = 1.26, p = 0.26$ ).  
6  
7 However, long-term former smokers (Category 2) showed a significantly lower AOR for Wave 2  
8  
9 SRO than persistent current smokers ( $\chi^2(1) = 16.9, p < 0.0001$ ). These data suggest that a  
10  
11 reduction in risk for future SRO with past smoking becomes apparent after a considerable period  
12  
13 of abstinence. Of additional interest were the risk estimates associated with re-starting (i.e.  
14  
15 relapse) and with beginning to smoke in Wave 2. Compared to persistent current smokers, the  
16  
17 AOR for Wave 2 SRO was significantly higher for both relapsers ( $\chi^2(1) = 56.00, p < 0.0001$ ), and  
18  
19 smoking beginners in Wave 2 ( $\chi^2(1) = 4.11, p = 0.04$ ). Further, the AOR for Wave 2 SRO was  
20  
21 significantly higher among relapsers than beginning smokers ( $\chi^2(1) = 19.0, p < 0.0001$ ).  
22  
23  
24  
25  
26  
27  
28

### 29 *Does prior SRO predict smoking?*

30  
31 A multiple regression model on current smoking in Wave 2 was fit using the identical list  
32  
33 of control variables for predicting Wave 2 SRO. This second model did not show a direct effect  
34  
35 of prior SRO on Wave 2 current smoking. Persons with Wave 1 SROs were *less* likely to report  
36  
37 current smoking status at Wave 2 than were persons who did not experience SRO in Wave 1  
38  
39 (AOR=0.81, 95% CI=0.72, 0.90).  
40  
41  
42

43 To understand the temporal relationship between smoking and SRO, the effects of the  
44  
45 interaction of Wave 1 smoking status (current vs. never smoker and former vs. never smoker)  
46  
47 with history of prior SRO were examined. Table 4 shows adjusted odds ratios from separate  
48  
49 multiple regression models on SRO and on current smoking in Wave 2 for combined effects of  
50  
51 smoking status and prior SRO reported in Wave 1. Never smokers without a prior SRO at Wave  
52  
53 1 comprised the reference group in each model. These analyses did not fundamentally change the  
54  
55  
56  
57  
58  
59  
60



1  
2  
3 finding that smoking predicts increased risk of SRO and that the reverse relationship does not  
4  
5 hold, but indicates nuanced impact of both SRO and smoking history.  
6  
7

8 The model on Wave 2 SRO (Table 4 section a) shows that, other characteristics (e.g.,  
9 demographics and psychopathology) being equal: a) all combinations of smoking status and SRO  
10 history had statistically significant risks for Wave 2 SRO relative to never smokers without prior  
11 SRO; and b) for each smoking category, the risks were considerably greater when the combined  
12 group involved a prior SRO. The data also show that former smoking and current smoking, in  
13 the absence of prior SRO, are valid predictors of an *initial* SRO. However, once a person has had  
14 a SRO, smoking status history does not change the risk prediction - the risk of *recurrence* is fully  
15 predicted by that prior SRO and the other characteristics. The second model, on Wave 2 current  
16 smoking (Table 4 section b), shows an expectedly substantial likelihood of being a current  
17 smoker in Wave 2 for current smokers in Wave 1, regardless of SRO history. Of interest, prior  
18 SRO predicted a contrasting *reduction* in the likelihood of smoking uptake in Wave 2 for former  
19 smokers and never smokers.  
20  
21  
22  
23  
24  
25  
26  
27  
28  
29  
30  
31  
32  
33  
34  
35  
36  
37

## 38 DISCUSSION

39  
40 The main findings from the present sample of persons reporting low mood are: 1) current  
41 and past smoking predicted increased risk for SRO independently of demographics, psychiatric  
42 factors, and prior SRO; 2) long-term smoking abstinence was associated with lower risk than  
43 persistent smoking; 3) new smoking due to relapse after a period of abstinence or to initiation of  
44 smoking by erstwhile never smokers was associated with an increased risk of SRO relative to  
45 persistent smoking; 4) prior SRO did not increase the risk of future smoking.  
46  
47  
48  
49  
50  
51  
52  
53  
54  
55  
56  
57  
58  
59  
60



1  
2  
3 For three Axis I disorders, i.e., mood, alcohol use, and substance use, the adjusted odds  
4 ratios indicated either insignificant effects or a decreased risk of future SRO. These results differ  
5 from the increased risks found in the unadjusted analyses, indicating confounding effects of  
6 correlated predictors of SRO, for example, prior SRO and comorbid psychiatric disorders (3-5).  
7  
8 In further analysis that excluded prior SRO in the multivariate model, a positive, predictive effect  
9 of mood disorder on future SRO (AOR=2.05, 95% CI=1.92,2.17) was observed, contrary to the  
10 reduced effect of mood disorder in the full model that adjusted for prior SRO (results available  
11 upon request). This finding exemplifies an instance when collinearity with a stronger predictor  
12 (e.g., Wave 1 SRO) overwhelmed the explanatory power of other predictors with weaker  
13 relationships. It is thus remarkable that significant effects of smoking on risk of SRO remained  
14 despite the evidence of effect suppression due to confounding. Ranked in decreasing order, the  
15 significant predictors of SRO risk in the present sample were: prior SRO, borderline personality  
16 disorder, ADHD, schizotypal disorder, current smoking, former smoking, avoidant personality  
17 disorder, and selected demographic characteristics.  
18  
19

20  
21  
22 Other than the present one, there have been seven longitudinal epidemiological studies of  
23 smoking and SRO (14-20). The positive effect of current smoking on future SRO reported here  
24 was also observed in three studies (14-16). Problems of recall due to the long, ten year, interval  
25 between data time points could explain the negative finding of the study by Kessler et al (17);  
26 while the younger age of the samples in two studies (19-20) could have masked a future effect.  
27  
28 Of clinical and public health importance is the finding, first reported here, that longer abstinence  
29 from smoking decreased the risk for SRO. The latter observation, not considered in two negative  
30 studies regarding past smoking (14, 16), could account for the inconsistent findings. Notably,  
31 the divergence according to longevity of abstinence is consistent with evidence for lung cancer  
32  
33  
34  
35  
36  
37  
38  
39  
40  
41  
42  
43  
44  
45  
46  
47  
48  
49  
50  
51  
52  
53  
54  
55  
56  
57  
58  
59  
60

1  
2  
3 and other smoking-related disorders that risk reduction from stopping smoking occurs only after  
4 multiple years of abstinence (30, 31). The worrisome observation that relapsers and new  
5 smokers are at even higher risk of future SRO than persistent smokers suggests particular targets  
6 for increased therapeutic attention. Finally, the data negated a reverse temporal relationship of  
7 SRO on smoking, as also seen in a study of adolescents (15). Instead, a reduction in risk for  
8 future smoking was observed among former and never smokers with prior SRO in Wave 1  
9 compared to their counterparts without prior SRO. Perhaps among those former and never  
10 smokers, already inclined towards the pro-health behaviour of not currently smoking, was a  
11 subset spurred by the prior SRO to undertake further health-promoting and therapeutic actions,  
12 which immunized them against future smoking. Their counterparts who did not experience a  
13 prior SRO were less likely to be as self-protective or to seek counselling and similar treatments,  
14 and were less immunized against resorting to new smoking. The serendipitous observation from  
15 the present sample that prior SRO and treatment seeking were well-correlated ( $r=0.43$ ,  $p=0.0001$ )  
16 is consistent with that conjecture.  
17  
18  
19  
20  
21  
22  
23  
24  
25  
26  
27  
28  
29  
30  
31  
32  
33  
34  
35

36 Strengths and limitations of the study are noted. An important strength is the  
37 concomitance of rigorous methods and materials not found in prior work on the smoking-suicide  
38 question – face-to-face interviews, a longitudinal design, a large sample, a validated instrument,  
39 and a comprehensive range of putative predictors that permitted statistical control of key  
40 background factors and comorbidities. A further strength is the use of a simple yet meaningful  
41 measure of smoking status (i.e., never, former or current smoking), that is easy for a questioner  
42 to administer and for the respondent to recall and understand. Even so, study limitations call for  
43 cautious interpretation of the findings. The present sample comprised the subgroup (22%) of  
44 Wave 2 participants (N=34,653) who self-reported low mood during the three-year interval  
45  
46  
47  
48  
49  
50  
51  
52  
53  
54  
55  
56  
57  
58  
59  
60

1  
2  
3 between the interviews. This selectivity yields findings relevant to mental health settings that are  
4 likely to serve persons experiencing mood problems; however, they may not generalize to the  
5 rest of the NESARC sample or to the national population. Second, the sample did not include  
6 persons who had completed suicide attempts. Using the U.S. rate of 11.1 per 100,000 population  
7 per year (32), the Wave 1 sample of 43,093 could be expected to include about 14 persons with  
8 completed suicides before Wave 2 (95% CI= 6.8, 21.6), introducing a non-trivial, although likely  
9 small, selection bias. Third, the present study did not assess the effects of medical conditions  
10 which are possibly causally related, albeit in different directions, to smoking and to SRO. Fourth,  
11 self-reported smoking information was not biologically validated. Fifth, the NESARC did not  
12 obtain information from adolescents, a subgroup with a known high risk for SRO (2). Finally, in  
13 exploratory, unadjusted, analyses, predictive effects of current smoking were observed across the  
14 individual SRO whereas past smoking predicted want to die and suicidal ideation, but not suicide  
15 attempt. Validation and articulation of these preliminary observations need to be accomplished in  
16 future work.

17  
18  
19  
20  
21  
22  
23  
24  
25  
26  
27  
28  
29  
30  
31  
32  
33  
34  
35  
36  
37 The rigorous methodology employed in the NESARC gives eminent credence to the  
38 central findings of this analysis - an independent effect of smoking on SRO and the absence of a  
39 positive influence of prior SRO on future smoking. These results are consistent with the  
40 hypothesis that smoking exerts a contributing, and not simply a correlational, effect on risk of  
41 SRO. By contrast, these results are inconsistent with the hypothesis that SRO causes smoking or  
42 that a third factor causes both smoking and SRO. The neurobiological, genetic, psychiatric and  
43 psychological underpinnings of these associations warrant further investigation. The knowledge  
44 gained could advance prevention and treatment options for reducing the prevalence of tobacco  
45 use and suicide.

1  
2  
3  
4  
5  
6  
7  
8  
9  
10 **Manuscript word count= 4,231**  
11  
12  
13  
14  
15  
16  
17  
18  
19  
20  
21  
22  
23  
24  
25  
26  
27  
28  
29  
30  
31  
32  
33  
34  
35  
36  
37  
38  
39  
40  
41  
42  
43  
44  
45  
46  
47  
48  
49  
50  
51  
52  
53  
54  
55  
56  
57  
58  
59  
60

Copyright. The Corresponding Author has the right to grant on behalf of all authors and does grant on behalf of all authors, [a worldwide license](#) to the Publishers and its licensees in perpetuity, in all forms, formats and media (whether known now or created in the future), to i) publish, reproduce, distribute, display and store the Contribution, ii) translate the Contribution into other languages, create adaptations, reprints, include within collections and create summaries, extracts and/or, abstracts of the Contribution, iii) create any other derivative work(s) based on the Contribution, iv) to exploit all subsidiary rights in the Contribution, v) the inclusion of electronic links from the Contribution to third party material where-ever it may be located; and, vi) license any third party to do any or all of the above.

The National Epidemiologic Survey on Alcohol and Related Conditions was sponsored by the National Institute on Alcohol Abuse and Alcoholism (NIAAA) and funded in part by the Intramural Program, NIAAA, National Institutes of Health, with additional support from the National Institute on Drug Abuse. No funding was obtained for this secondary analysis.

1  
2  
3  
4  
5 All authors have completed the Unified Competing Interest form  
6  
7

8 ([www.icmje.org/coi\\_disclosure.pdf](http://www.icmje.org/coi_disclosure.pdf). 1) JH received support from NIAAA through the US  
9  
10 Census Bureau for the submitted work; 2) LC, IB, and MH received no specific support for this  
11  
12 work; 3) IB received occasional honoraria for participating in advisory panels of Pfizer Ltd  
13  
14 during the last 3 years; 4) in February 2011, LC provided educational consultation to a law firm  
15  
16 regarding mood effects of smoking cessation; 4) JH and MH had no relationships with any  
17  
18 company that might have an interest in the submitted work in the previous 3 years; 5) none of the  
19  
20 spouses of the authors had financial relationships that may be relevant to the submitted work; 6)  
21  
22 none of the authors had a non-financial interest that may be relevant to the submitted work.  
23  
24  
25  
26  
27

28 Lirio Covey and Ivan Berlin conceptualized this study and, with Mei-Chen Hu, designed the  
29  
30 analysis. Jahn Hakes had full access to all of the data in the study and takes responsibility for the  
31  
32 integrity of the data and the accuracy of the data analysis. Lirio Covey was the lead writer of the  
33  
34 manuscript. All authors participated in the interpretation of findings and writing of the  
35  
36 manuscript. All authors had full access to the statistical reports, tables, and the manuscript; and  
37  
38 take responsibility for the integrity of the data and the accuracy of the data analysis. The U.S.  
39  
40 Census Bureau, NIAAA, and other employers of the authors had no role in the study design,  
41  
42 implementation of the study, analysis and interpretation of data, in the writing of the report, and  
43  
44 the decision to submit the article for publication.  
45  
46  
47  
48  
49  
50  
51

52 The authors thank the reviewers of this article for their helpful comments.  
53  
54  
55  
56  
57  
58  
59  
60

1  
2  
3 The study is a secondary analysis of data collected by the National Institute of Health-National  
4  
5  
6 Institute of Alcohol and Alcohol Abuse of the US government. Before data collection, each  
7  
8 respondent was informed of the nature of the survey and its potential uses, ensured of  
9  
10 confidentiality, and told that participation was voluntary. All participants signed a consent form  
11  
12 prior to participating in the interviews. The US Census Bureau and the US Office of  
13  
14 Management and Budget reviewed and approved the ethics protocol. Individual data files are  
15  
16 de-identified to prevent full anonymity of participants. Approval for conducting this secondary  
17  
18 analysis of previously collected data was not required.  
19  
20  
21  
22  
23

24  
25 In order to safeguard sensitive personal information, NESARC data are not available for public  
26  
27 use. The restricted use data sets are maintained by the U.S. Census Bureau on behalf of NIAAA,  
28  
29 and any requests to use NESARC data for replication or other purposes may be directed to the  
30  
31 NIAAA coordinator for NESARC, Aaron White ([whitea4@mail.nih.gov](mailto:whitea4@mail.nih.gov)).  
32  
33  
34  
35  
36  
37  
38  
39  
40  
41  
42  
43  
44  
45  
46  
47  
48  
49  
50  
51  
52  
53  
54  
55  
56  
57  
58  
59  
60

## REFERENCES

1. World Health Organization. *Suicide prevention*. (2010) Retrieved from [http://www.who.int/mental\\_health/prevention/suicide/suicideprevent/en/accessed](http://www.who.int/mental_health/prevention/suicide/suicideprevent/en/accessed) .
2. Nock MK, Borges G, Bromet EJ, Cha CB, Kessler RC, Lee S. Suicide and suicidal behavior. *Epidemiol Rev*. 2008;30 (1):133-54.
3. Tidemalm D, Långström N, Lichtenstein P, Runeson B. Risk of suicide after suicide attempt according to coexisting psychiatric disorder: Swedish cohort study with long term follow-up. *BMJ*. 2008 Nov 18;337:a2205.
4. Harris EC, Barraclough B. Suicide as an outcome for mental disorders. A meta-analysis. *Br. J Psychiatry*, 1997; 170: 205-208.
5. Nock MK, Hwang I, Sampson NA, Kessler RC. Mental disorders, comorbidity and suicidal behavior: results from the National Comorbidity Survey Replication. *Mol Psychiatry*. 2010;15(8):868-76.
6. CDC - Health Effects - Smoking & Tobacco Use, [http://www.cdc.gov/tobacco/basic\\_information/health\\_effects/index.htm](http://www.cdc.gov/tobacco/basic_information/health_effects/index.htm)
7. John U, Meyer C, Rumpf HJ, Hapke U. Smoking, nicotine dependence and psychiatric comorbidity--a population-based study including smoking cessation after three years. *Drug Alcohol Depend*. 2004 ; 76(3):287-95.
8. Choi WS, Patten CA, Gillin JC, Kaplan RM, Pierce JP, Cigarette smoking predicts development of depressive symptoms among U.S. adolescents. *Ann Behav Med*; 1997 ;19 (1):42-50.
9. Hughes, J. R. Smoking and suicide: A brief overview. *Drug Alcohol Depend*. 2008; 98 (3), 169–178.
10. Doll R, Peto R. Mortality in relation to smoking, 20 years' observations on male British doctors. *BMJ*. 1976; 2 (6051): 1525-1536.
11. Bolton, JM, Robinson J. Population-attributable fractions of Axis I and Axis II mental disorders for suicide attempts; Findings from a representative sample of the adult, non-institutionalized US population. *Am J Public Health*, 2010; 100 (12): 2473-2480.
12. Scherrer JF, Grant JD, Agrawal A, Madden PA, Fu Q, Jacob T, Bucholz KK, Xian H. Suicidal Behavior, Smoking, and Familial Vulnerability. *Nicotine Tob Res*. 2012;14(4):415-424

13. Yaworski D, Robinson J, Sareen J, Bolton JM. The relation between nicotine dependence and suicide attempts in the general population. *Can J Psychiatry*. 2011 Mar;56(3):161-70.
14. Breslau N, Schultz LR, Johnson EO, Peterson EL, Davis GC. Smoking and the risk of suicidal behavior: a prospective study of a community sample. *Arch Gen Psychiatry*, 2005; 62 (3): 328-334.
15. Bronisch T, Höfler M, Lieb R. Smoking predicts suicidality: findings from a prospective community study. *J Affect Disord*. 2008;108(1-2):135-45
16. Clarke DE, Eaton WE, Petronis KR, Ko JY, Chatterjee A, Anthony JC. Increased risk of suicidal ideation in smokers and former smokers compared to never smokers: Evidence from the Baltimore ECA follow-up study. *Suicide Life Threat Behav*. 2010; 40 (4): 307-318.
17. Kessler RC, Borges G, Sampson N, Miller M, Nock MK. The association between smoking and subsequent suicide-related outcomes in the National Comorbidity Survey panel sample. *Molecular Psychiatry*. 2009; 14(12):1132-42.
18. Boden JM, Fergusson DM., Horwood LJ. Cigarette smoking and suicidal behaviour: results from a 25-year longitudinal study. *Psychol Med*. 2008; 38(3): 433-439.
19. McGee R, Williams S, Nada-Raja S. Is cigarette smoking associated with suicidal ideation among young people? *Am J Psychiatry*. 2005; 162(3):619-20.
20. Wilcox HC, Anthony JC. The development of suicidal ideation and attempts: an epidemiologic study of first graders followed into young adulthood. *Drug Alcohol Dependence* 2004; 76 (Suppl): S53-S67.
21. Berlin I, Covey LS, Donohue MC, Agostini V. Duration of smoking abstinence and suicide-related outcomes. *Nicotine Tob Res*. 2011;13(10):887-893.
22. Grant BF, Stinson FS, Dawson DA, Chou SP, Ruan WJ, Pickering RP. Co-occurrence of 12-month alcohol and drug use disorders and personality disorders in the United States: results from the National Epidemiologic Survey on Alcohol and Related Conditions. *Arch Gen Psychiatry*. 2004;61(4):361-8.
23. Nordentoft M. Prevention of suicide and attempted suicide in Denmark. Epidemiological studies of suicide and intervention studies in selected risk groups. *Dan Med Bull*. 2007; 54(4):306-69.
24. Grant BF, et al. Source and Accuracy Statement for Wave 1 of the 2001-2002 NESARC. National Institute on Alcohol Abuse and Alcoholism: Bethesda, MD; 2003. URL: <https://www.fbo.gov/utills/view?id=2f8b6b30ed2a57485da564b32f6e9e60>.



- 1  
2  
3  
4  
5  
6  
7  
8  
9  
10  
11  
12  
13  
14  
15  
16  
17  
18  
19  
20  
21  
22  
23  
24  
25  
26  
27  
28  
29  
30  
31  
32  
33  
34  
35  
36  
37  
38  
39  
40  
41  
42  
43  
44  
45  
46  
47  
48  
49  
50  
51  
52  
53  
54  
55  
56  
57  
58  
59  
60
25. Grant, B.F., and Kaplan, K.D. Source and Accuracy Statement for the 2004–2005 Wave 2 National Epidemiologic Survey on Alcohol and Related Conditions. Bethesda, MD; National Institute on Alcohol Abuse and Alcoholism, 2005. URL: <https://www.fbo.gov/utills/view?id=808b8e8cfcaa3c366c39c2ef643a40d5>.
  26. Hughes JR, Baker T, Breslau N, Covey L, Shiffman S. Applicability of DSM criteria to nicotine dependence. *Addiction*. 2011;106(5):894-5
  27. Mwenifumbo JC, Tyndale RF. DSM-IV, ICD-10 and FTND: Discordant Tobacco Dependence Diagnoses in Adult Smokers, *J Addict Res Ther*, 2011; 2:1
  28. Ruan WJ, Goldstein RB, Chou SP, Smith SM, Saha TD, Pickering RP, Dawson DA, Huang B, Stinson FS, Grant BF. The alcohol use disorder and associated disabilities interview schedule-IV (AUDADIS-IV): reliability of new psychiatric diagnostic modules and risk factors in a general population sample. *Drug Alcohol Depend*. 2008; 92(1-3):27-36.
  29. Granger CWJ. Investigating Causal Relations by Econometric Models and Cross-Spectral Methods. *Econometrica*. 1969; 37(3):424-438.
  30. Novello, AC. Surgeon General's report on the health benefits of smoking cessation. *Public Health Rep*. 1990; 105(6): 545–548.
  31. Cao, Y, Kenfield S, Song Y, Rosner B, Qiu W, Sesso HD, Gaziano JM. Cigarette Smoking Cessation and Total and Cause-Specific Mortality: A 22-Year Follow-up Study Among US Male Physicians. *Arch Intern Med* 2011; 171 (21), 1956-1958.
  32. National Institute of Mental Health, Suicide in the United States, Statistics and Prevention, NIH Publication No. 06-4594, pp 56-59 [www.nimh.gov](http://www.nimh.gov).

Table 1: Wave 1 characteristics of the low mood sample and the rest of the NESARC Wave 2 sample. Weighted percentages<sup>a</sup> (%) and standard error (s.e)

| Variable                                     | Total Wave 2 sample % | s.e. | Low mood sample <sup>b</sup> % | s.e. | Rest of sample <sup>c</sup> % | s.e. |
|----------------------------------------------|-----------------------|------|--------------------------------|------|-------------------------------|------|
| Sample size                                  | 34,653                |      | 7,352                          |      | 27,301                        |      |
| <b>Smoking status</b>                        |                       |      |                                |      |                               |      |
| Current smoker                               | 27.02                 | 0.17 | 31.65                          | 0.38 | 25.85                         | 0.19 |
| Former smoker                                | 19.58                 | 0.16 | 17.84                          | 0.28 | 20.02                         | 0.17 |
| Never smoker                                 | 53.40                 | 0.19 | 50.51                          | 0.42 | 54.13                         | 0.20 |
| <b>Wave 1 Suicide related outcomes (SRO)</b> |                       |      |                                |      |                               |      |
| Want to die                                  | 11.42                 | 0.10 | 25.55                          | 0.27 | 7.84                          | 0.10 |
| Suicidal ideation                            | 10.17                 | 0.10 | 23.35                          | 0.26 | 6.82                          | 0.10 |
| Suicide ideation                             | 8.42                  | 0.09 | 19.27                          | 0.27 | 5.66                          | 0.09 |
| Suicide attempt                              | 2.35                  | 0.04 | 6.09                           | 0.17 | 1.40                          | 0.04 |
| <b>Demographics</b>                          |                       |      |                                |      |                               |      |
| <b>Gender</b>                                |                       |      |                                |      |                               |      |
| Female                                       | 52.08                 | 0.16 | 64.13                          | 0.40 | 49.02                         | 0.17 |
| Male                                         | 47.92                 | 0.16 | 35.87                          | 0.40 | 50.98                         | 0.17 |
| <b>Race/Ethnicity</b>                        |                       |      |                                |      |                               |      |
| White                                        | 70.93                 | 0.24 | 71.39                          | 0.40 | 70.81                         | 0.25 |
| Black                                        | 10.75                 | 0.20 | 10.61                          | 0.22 | 10.79                         | 0.21 |
| Hispanic                                     | 11.56                 | 0.10 | 11.20                          | 0.15 | 11.65                         | 0.12 |
| Asian/Pac. Islander                          | 4.36                  | 0.06 | 3.50                           | 0.10 | 4.58                          | 0.06 |
| Amer. Indian/Alaska Native                   | 2.40                  | 0.11 | 3.29                           | 0.20 | 2.17                          | 0.11 |
| <b>Age:</b>                                  |                       |      |                                |      |                               |      |
| 18-19                                        | 4.02                  | 0.07 | 4.47                           | 0.15 | 3.91                          | 0.08 |
| 20-29                                        | 17.78                 | 0.14 | 19.28                          | 0.30 | 17.40                         | 0.15 |
| 30-44                                        | 30.90                 | 0.17 | 32.28                          | 0.29 | 30.54                         | 0.18 |
| 45-64                                        | 31.08                 | 0.15 | 31.64                          | 0.24 | 30.94                         | 0.17 |
| 65and over                                   | 16.22                 | 0.10 | 12.32                          | 0.25 | 17.21                         | 0.12 |
| <b>Household Income:</b>                     |                       |      |                                |      |                               |      |
| Less than \$20,000                           | 20.35                 | 0.17 | 25.07                          | 0.32 | 19.15                         | 0.19 |
| \$20,000 to \$34,999                         | 19.62                 | 0.13 | 20.84                          | 0.27 | 19.31                         | 0.15 |
| \$35,000 to \$59,999                         | 26.27                 | 0.16 | 24.85                          | 0.31 | 26.63                         | 0.17 |
| \$60,000 and over                            | 33.76                 | 0.16 | 29.24                          | 0.33 | 34.91                         | 0.17 |
| <b>Marital status:</b>                       |                       |      |                                |      |                               |      |
| Married                                      | 59.81                 | 0.17 | 54.75                          | 0.35 | 61.10                         | 0.17 |
| Cohabiting                                   | 3.25                  | 0.06 | 3.60                           | 0.11 | 3.16                          | 0.07 |
| Widowed                                      | 6.04                  | 0.07 | 5.37                           | 0.12 | 6.21                          | 0.08 |
| Divorced                                     | 8.45                  | 0.06 | 10.73                          | 0.19 | 7.87                          | 0.07 |
| Separated                                    | 1.98                  | 0.04 | 2.98                           | 0.12 | 1.73                          | 0.04 |
| Never Married                                | 20.46                 | 0.17 | 22.57                          | 0.33 | 19.93                         | 0.17 |

|                                       |       |      |       |      |       |      |
|---------------------------------------|-------|------|-------|------|-------|------|
| Education:                            |       |      |       |      |       |      |
| Less than HS                          | 14.65 | 0.13 | 16.25 | 0.26 | 14.24 | 0.14 |
| High School diploma                   | 29.03 | 0.18 | 29.35 | 0.35 | 28.95 | 0.20 |
| College                               | 56.32 | 0.22 | 54.40 | 0.38 | 56.81 | 0.23 |
| Unemployed                            | 7.16  | 0.09 | 12.31 | 0.25 | 5.85  | 0.09 |
| Not unemployed                        | 92.84 | 0.09 | 87.69 | 0.25 | 94.15 | 0.09 |
| Urban                                 | 28.89 | 0.26 | 30.59 | 0.41 | 28.46 | 0.25 |
| Rural/Not in Central City             | 71.11 | 0.26 | 69.41 | 0.41 | 71.54 | 0.25 |
| Northeast                             | 19.67 | 0.08 | 18.57 | 0.15 | 19.95 | 0.10 |
| Midwest                               | 23.15 | 0.16 | 23.52 | 0.32 | 23.05 | 0.21 |
| South                                 | 35.21 | 0.15 | 34.89 | 0.39 | 35.29 | 0.19 |
| West                                  | 21.97 | 0.11 | 23.02 | 0.23 | 21.71 | 0.15 |
| <b>Lifetime Psychiatric Disorders</b> |       |      |       |      |       |      |
| Axis I Disorders                      |       |      |       |      |       |      |
| Alcohol Use                           | 30.43 | 0.20 | 33.57 | 0.39 | 29.63 | 0.20 |
| Substance Use                         | 10.42 | 0.11 | 15.06 | 0.26 | 9.25  | 0.11 |
| Nicotine Dependence                   | 17.47 | 0.13 | 24.33 | 0.37 | 15.73 | 0.13 |
| Anxiety disorder                      | 17.88 | 0.17 | 31.00 | 0.34 | 14.55 | 0.17 |
| Mood disorder                         | 21.09 | 0.13 | 41.82 | 0.33 | 15.82 | 0.13 |
| Attention Deficit/Hyperactivity       | 2.51  | 0.06 | 5.82  | 0.19 | 1.67  | 0.05 |
| Axis II Disorders                     |       |      |       |      |       |      |
| Borderline                            | 5.89  | 0.08 | 18.44 | 0.28 | 2.70  | 0.07 |
| Schizotypal                           | 3.93  | 0.06 | 11.20 | 0.24 | 2.09  | 0.05 |
| Narcissistic                          | 6.18  | 0.08 | 11.88 | 0.23 | 4.74  | 0.08 |
| Avoidant                              | 2.32  | 0.05 | 6.14  | 0.17 | 1.36  | 0.05 |
| Antisocial                            | 3.63  | 0.07 | 5.86  | 0.21 | 3.07  | 0.07 |
| Dependent                             | 0.43  | 0.02 | 1.36  | 0.09 | 0.19  | 0.01 |
| Obsessive-Compulsive                  | 8.07  | 0.10 | 13.50 | 0.31 | 6.69  | 0.09 |
| Paranoid                              | 4.33  | 0.07 | 9.66  | 0.21 | 2.98  | 0.06 |
| Schizoid                              | 3.06  | 0.06 | 6.44  | 0.21 | 2.21  | 0.05 |
| Histrionic                            | 1.80  | 0.04 | 3.68  | 0.15 | 1.32  | 0.04 |

<sup>a</sup>The sampling weight variable in Wave 2 was used.

<sup>b</sup>Respondents in NESARC Wave 2 who reported low mood lasting two weeks or more during the three-year interval covered in the Wave 2 NESARC and were asked the three suicidal behavior questions.

<sup>c</sup>Respondents in NESARC Wave 2 who did not report low mood and were not asked the three suicidal questions.

Table 2: Weighted percentage of suicide related outcomes (SRO)<sup>a</sup> reported in Wave 2 by Wave 1 characteristics, and unadjusted and adjusted odds ratios for risk of Wave 2 SRO among persons reporting low mood at the NESARC Wave 2 interview. (N=7352)<sup>b</sup>

| Variable                             | n/N       | Weighted percentage of Wave 2 SRO | Standard error | OR <sup>c</sup> | 95% CI     | AOR <sup>d</sup> | 95% CI     |
|--------------------------------------|-----------|-----------------------------------|----------------|-----------------|------------|------------------|------------|
| <b>Smoking history</b>               |           |                                   |                |                 |            |                  |            |
| Current smoker in Wave 1             |           |                                   |                |                 |            |                  |            |
| Former Smoker in Wave 1              | 809/2217  | 35.73                             | 0.64           | 1.77            | 1.64, 1.90 | 1.41             | 1.28, 1.55 |
| Never Smoker in Wave 1               | 339/1280  | 26.68                             | 0.67           | 1.16            | 1.07, 1.25 | 1.32             | 1.21, 1.43 |
|                                      | 981/3855  | 23.94                             | 0.43           | 1.00            |            | 1.00             |            |
| <b>SRO in Wave 1</b>                 |           |                                   |                |                 |            |                  |            |
|                                      | 1009/1940 | 50.01                             | 0.76           | 3.84            | 3.60, 4.10 | 3.49             | 3.18, 3.84 |
| <b>Demographics</b>                  |           |                                   |                |                 |            |                  |            |
| <b>Sex</b>                           |           |                                   |                |                 |            |                  |            |
| Female                               | 1488/5090 | 28.51                             | 0.36           | 1.05            | 0.98, 1.12 | 1.13             | 1.04, 1.22 |
| Male                                 | 641/2262  | 27.54                             | 0.59           | 1.00            |            | 1.00             |            |
| <b>Race</b>                          |           |                                   |                |                 |            |                  |            |
| White                                | 1253/4295 | 28.38                             | 0.36           | 1.00            |            | 1.00             |            |
| Black                                | 333/1352  | 26.53                             | 0.70           | 0.91            | 0.84, 0.99 | 0.84             | 0.76, 0.92 |
| Hispanic                             | 438/1342  | 30.33                             | 0.52           | 1.10            | 1.04, 1.17 | 1.26             | 1.16, 1.36 |
| Asian/Pacific Islander               | 47/ 169   | 22.68                             | 0.84           | 0.74            | 0.67, 0.82 | 0.93             | 0.82, 1.06 |
| American Indian                      | 58/ 194   | 27.18                             | 2.81           | 0.94            | 0.71, 1.25 | 0.69             | 0.51, 0.92 |
| <b>Age</b>                           |           |                                   |                |                 |            |                  |            |
| Age 18-19                            | 94/ 264   | 36.65                             | 1.73           | 1.00            |            | 1.00             |            |
| Age 20-29                            | 410/1287  | 31.40                             | 0.67           | 0.83            | 0.69, 0.98 | 0.77             | 0.63, 0.94 |
| Age 30-44                            | 750/2438  | 29.32                             | 0.62           | 0.75            | 0.64, 0.88 | 0.73             | 0.60, 0.90 |
| Age 45-64                            | 679/2395  | 26.82                             | 0.63           | 0.66            | 0.56, 0.78 | 0.69             | 0.56, 0.84 |
| Age 65 and over                      | 196/ 968  | 20.90                             | 0.93           | 0.47            | 0.39, 0.57 | 0.68             | 0.54, 0.86 |
| <b>Marital Status</b>                |           |                                   |                |                 |            |                  |            |
| Married                              | 836/3309  | 24.87                             | 0.49           | 1.00            |            | 1.00             |            |
| Cohabiting                           | 86/ 230   | 35.58                             | 1.67           | 1.67            | 1.42, 1.96 | 1.27             | 1.07, 1.51 |
| Widowed                              | 128/ 562  | 24.26                             | 1.09           | 0.97            | 0.85, 1.10 | 0.92             | 0.78, 1.07 |
| Divorced                             | 390/1104  | 36.01                             | 0.84           | 1.70            | 1.57, 1.84 | 1.20             | 1.10, 1.32 |
| Separated                            | 130/ 338  | 37.93                             | 1.78           | 1.85            | 1.58, 2.15 | 1.29             | 1.06, 1.56 |
| Never married                        | 559/2129  | 30.87                             | 0.69           | 1.35            | 1.24, 1.46 | 0.97             | 0.87, 1.09 |
| <b>Education</b>                     |           |                                   |                |                 |            |                  |            |
| Less than High School                | 440/1358  | 31.58                             | 0.92           | 1.17            | 1.04, 1.32 | 1.09             | 0.95, 1.25 |
| High School Diploma                  | 606/2111  | 28.27                             | 0.74           | 1.00            |            | 1.00             |            |
| Some College or more                 | 1083/3883 | 27.08                             | 0.35           | 0.94            | 0.87, 1.02 | 1.08             | 1.00, 1.17 |
| <b>Lifetime Psychiatric Disorder</b> |           |                                   |                |                 |            |                  |            |
| <b>Axis I Disorders</b>              |           |                                   |                |                 |            |                  |            |
| Alcohol Use                          | 811/2350  | 32.74                             | 0.60           | 1.40            | 1.31, 1.49 | 0.95             | 0.87, 1.04 |
| Substance Use                        | 427/1033  | 38.42                             | 0.94           | 1.75            | 1.61, 1.89 | 0.98             | 0.88, 1.09 |

|                                             |           |       |      |      |            |      |            |
|---------------------------------------------|-----------|-------|------|------|------------|------|------------|
| Anxiety                                     | 843/2278  | 37.57 | 0.60 | 1.72 | 1.62, 1.83 | 1.08 | 1.01, 1.17 |
| Mood                                        | 1217/3151 | 36.62 | 0.48 | 2.04 | 1.92, 2.17 | 0.77 | 0.70, 0.84 |
| Attention Deficit<br>Hyperactivity Disorder | 208/ 394  | 51.14 | 1.42 | 2.87 | 2.56, 3.22 | 1.56 | 1.36, 1.79 |
| Axis II Disorders                           |           |       |      |      |            |      |            |
| Borderline                                  | 821/1433  | 55.75 | 0.79 | 4.49 | 4.22, 4.77 | 2.91 | 2.69, 3.16 |
| Schizotypal                                 | 485/ 886  | 53.41 | 1.26 | 3.44 | 3.09, 3.84 | 1.50 | 1.31, 1.72 |
| Narcissistic                                | 443/ 993  | 42.49 | 1.01 | 2.08 | 1.89, 2.29 | 1.03 | 0.92, 1.14 |
| Avoidant                                    | 245/ 446  | 51.87 | 1.37 | 2.97 | 2.66, 3.32 | 1.29 | 1.05, 1.58 |
| Antisocial                                  | 188/ 395  | 41.55 | 1.39 | 1.89 | 1.68, 2.13 | 0.85 | 0.72, 1.01 |
| Dependent                                   | 58/ 90    | 56.90 | 2.90 | 3.44 | 2.74, 4.30 | 1.04 | 0.76, 1.41 |
| Ob-Com                                      | 377/ 961  | 36.07 | 1.05 | 1.53 | 1.39, 1.69 | 0.90 | 0.80, 1.00 |
| Paranoid                                    | 364/ 756  | 45.74 | 1.16 | 2.37 | 2.14, 2.62 | 0.95 | 0.82, 1.10 |
| Schizoid                                    | 210/ 473  | 43.81 | 1.26 | 2.10 | 1.89, 2.33 | 1.01 | 0.88, 1.16 |
| Histrionic                                  | 129/ 266  | 44.42 | 1.83 | 2.10 | 1.82, 2.43 | 0.76 | 0.63, 0.93 |

<sup>a</sup>SRO (Suicide related outcome: feel like want to die, suicide ideation, suicide attempt; 0=None, 1=any SRO).

<sup>b</sup>Missing observations for specific variables: Race – 43, Hispanic origin – 2, age – 13, marital status- 4, educational attainment – 70, household income-2544, unemployed – 28, Wave 2 individual suicide related outcomes – 12-18 “unknown” changed to “no”. Treatment of unknown values in determination of psychiatric diagnosis variables is known only to original NESARC project staff at NIAAA.

<sup>c</sup>Odds Ratios (OR) and 95% confidence intervals (CI) based on simple regression models estimating Wave 2 SRO as a function of an individual predictor variable.

<sup>d</sup>Adjusted Odds Ratios (AOR) and 95% CI based on a multiple logistic regression estimating Wave 2 SRO as a function of age, sex, race/ethnicity, marital status, income, education, unemployed status, Census region, urban residence, smoking status, Axis I and Axis II disorders (as described in text), and lifetime SRO prior to Wave 1.

Table 3: Effects on Wave 2 suicide related outcomes (SRO) according to smoking status change as reported in NESARC Wave 1 and Wave 2 interviews.

| Smoking status in Wave 1 to Wave 2                                          | n/N                 | Weighted percentage <sup>b</sup><br>(standard error) | Wave 2 SRO <sup>a</sup> |            |
|-----------------------------------------------------------------------------|---------------------|------------------------------------------------------|-------------------------|------------|
|                                                                             |                     |                                                      | AOR <sup>c</sup>        | 95% CI     |
| 1. Consistent never smoker (in Wave 1 and Wave 2)                           | 897/3653            | 47.8<br>(0.40)                                       | 1.00                    |            |
| 2. Long-term former smoker (in Wave 1 and Wave 2)                           | 293/1185            | 16.4<br>(0.26)                                       | 1.22                    | 1.12, 1.34 |
| 3. Recent former smoker (current smoker in Wave 1, former smoker in Wave 2) | 126/393             | 5.3<br>(0.14)                                        | 1.37                    | 1.16, 1.63 |
| 4. Persistent current smoker (in Wave 1 and Wave 2)                         | 683/1824            | 26.3<br>(0.35)                                       | 1.50                    | 1.35, 1.66 |
| 5. New current smoker (never smoker in Wave 1, current smoker in Wave 2)    | 82/194              | 2.6<br>(0.10)                                        | 1.82                    | 1.51, 2.19 |
| 6. Relapser (former smoker in Wave 1, current smoker in Wave 2)             | 46/95               | 1.5<br>(0.08)                                        | 3.42                    | 2.85, 4.11 |
|                                                                             | N=7352 <sup>d</sup> |                                                      |                         |            |

<sup>a</sup>Any of three items: want to die, suicidal ideation, suicide attempt

<sup>b</sup>The sampling weight variable in Wave 2 was used.

<sup>c</sup>AORs are adjusted odds ratio with 95% confidence intervals (CI) based on multiple logistic regression of Wave 2 SRO as a function of age, sex, race/ethnicity, marital status, income, education, unemployed status, Census region, urban residence, smoking status, Axis I and Axis II disorders (as described in text), and lifetime SRO reported in Wave 1.

<sup>d</sup>The seventh group (n=8), which consisted of persons who were never smokers in Wave 1, began to smoke and then stopped smoking in Wave 2, was too small for a valid assessment of risk.

Table 4: Combined effects of smoking status and prior SRO<sup>a</sup> reported in Wave 1  
on a) Wave 2 SRO and b) Wave 2 current smoking

| Wave 1 Smoking status and Wave 1 SRO       | n/N         | Weighted percentages (standard error) | AOR <sup>b</sup> | 95% CI            |
|--------------------------------------------|-------------|---------------------------------------|------------------|-------------------|
| <b>a) Effect on Wave 2 SRO</b>             |             |                                       |                  |                   |
| Never smoker - No prior SRO (referent)     | 550 / 2978  | 17.5 (0.4)                            | 1.00             | N.A. <sup>c</sup> |
| Never smoker - Prior SRO                   | 431 / 877   | 46.8 (1.0)                            | 4.12             | 3.65, 4.64        |
| Former smoker - No prior SRO               | 187 / 968   | 20.6 (0.8)                            | 1.42             | 1.28, 1.57        |
| Former smoker - Prior SRO                  | 152 / 312   | 48.2 (1.6)                            | 4.58             | 3.60, 5.82        |
| Current smoker - No prior SRO              | 383 / 1466  | 26.6 (0.7)                            | 1.56             | 1.41, 1.74        |
| Current smoker - Prior SRO                 | 426 / 751   | 54.1 (1.2)                            | 4.77             | 3.70, 5.87        |
| <b>b) Effect on Wave 2 Current smoking</b> |             |                                       |                  |                   |
| Never smoker – No prior SRO (referent)     | 166 / 2978  | 5.3 (0.2)                             | 1.00             | N.A. <sup>c</sup> |
| Never smoker – Prior SRO                   | 28 / 877    | 4.3 (0.4)                             | 0.70             | 0.60, 0.82        |
| Former smoker – No prior SRO               | 71 / 968    | 8.6 (0.5)                             | 2.20             | 1.77, 2.31        |
| Former smoker – Prior SRO                  | 24 / 312    | 6.9 (0.6)                             | 1.15             | 0.83, 1.61        |
| Current smoker – No prior SRO              | 1204 / 1466 | 82.7 (0.5)                            | 82.9             | 73.7, 93.2        |
| Current smoker – Prior SRO                 | 620 / 751   | 84.2 (0.8)                            | 77.0             | 57.6, 104.8       |

<sup>a</sup>Any of three items: want to die, suicidal ideation, suicide attempt

<sup>b</sup>AORs are adjusted odds ratios with 95% confidence intervals (CI) based on multiple logistic regression models controlling for demographics and psychiatric history at Wave 1 (shown in Table 1).

<sup>c</sup>Not applicable



STROBE Statement—Checklist of items that should be included in reports of *cohort studies*

|                              | Item No | Recommendation                                                                                                                                                                                                                                                                                                                                                                                                |
|------------------------------|---------|---------------------------------------------------------------------------------------------------------------------------------------------------------------------------------------------------------------------------------------------------------------------------------------------------------------------------------------------------------------------------------------------------------------|
| <b>Title and abstract</b>    | 1       | (a) Indicate the study's design with a commonly used term in the title or the abstract<br>(b) Provide in the abstract an informative and balanced summary of what was done and what was found                                                                                                                                                                                                                 |
| <b>Introduction</b>          |         |                                                                                                                                                                                                                                                                                                                                                                                                               |
| Background/rationale         | 2       | Explain the scientific background and rationale for the investigation being reported                                                                                                                                                                                                                                                                                                                          |
| Objectives                   | 3       | State specific objectives, including any prespecified hypotheses                                                                                                                                                                                                                                                                                                                                              |
| <b>Methods</b>               |         |                                                                                                                                                                                                                                                                                                                                                                                                               |
| Study design                 | 4       | Present key elements of study design early in the paper                                                                                                                                                                                                                                                                                                                                                       |
| Setting                      | 5       | Describe the setting, locations, and relevant dates, including periods of recruitment, exposure, follow-up, and data collection                                                                                                                                                                                                                                                                               |
| Participants                 | 6       | (a) Give the eligibility criteria, and the sources and methods of selection of participants. Describe methods of follow-up<br>(b) For matched studies, give matching criteria and number of exposed and unexposed                                                                                                                                                                                             |
| Variables                    | 7       | Clearly define all outcomes, exposures, predictors, potential confounders, and effect modifiers. Give diagnostic criteria, if applicable                                                                                                                                                                                                                                                                      |
| Data sources/<br>measurement | 8*      | For each variable of interest, give sources of data and details of methods of assessment (measurement). Describe comparability of assessment methods if there is more than one group                                                                                                                                                                                                                          |
| Bias                         | 9       | Describe any efforts to address potential sources of bias                                                                                                                                                                                                                                                                                                                                                     |
| Study size                   | 10      | Explain how the study size was arrived at                                                                                                                                                                                                                                                                                                                                                                     |
| Quantitative variables       | 11      | Explain how quantitative variables were handled in the analyses. If applicable, describe which groupings were chosen and why                                                                                                                                                                                                                                                                                  |
| Statistical methods          | 12      | (a) Describe all statistical methods, including those used to control for confounding<br>(b) Describe any methods used to examine subgroups and interactions<br>(c) Explain how missing data were addressed<br>(d) If applicable, explain how loss to follow-up was addressed<br>(e) Describe any sensitivity analyses                                                                                        |
| <b>Results</b>               |         |                                                                                                                                                                                                                                                                                                                                                                                                               |
| Participants                 | 13*     | (a) Report numbers of individuals at each stage of study—eg numbers potentially eligible, examined for eligibility, confirmed eligible, included in the study, completing follow-up, and analysed<br>(b) Give reasons for non-participation at each stage<br>(c) Consider use of a flow diagram                                                                                                               |
| Descriptive data             | 14*     | (a) Give characteristics of study participants (eg demographic, clinical, social) and information on exposures and potential confounders<br>(b) Indicate number of participants with missing data for each variable of interest<br>(c) Summarise follow-up time (eg, average and total amount)                                                                                                                |
| Outcome data                 | 15*     | Report numbers of outcome events or summary measures over time                                                                                                                                                                                                                                                                                                                                                |
| Main results                 | 16      | (a) Give unadjusted estimates and, if applicable, confounder-adjusted estimates and their precision (eg, 95% confidence interval). Make clear which confounders were adjusted for and why they were included<br>(b) Report category boundaries when continuous variables were categorized<br>(c) If relevant, consider translating estimates of relative risk into absolute risk for a meaningful time period |



|    |                          |    |                                                                                        |
|----|--------------------------|----|----------------------------------------------------------------------------------------|
| 1  | Other analyses           | 17 | Report other analyses done—eg analyses of subgroups and interactions, and              |
| 2  |                          |    | sensitivity analyses                                                                   |
| 3  | <b>Discussion</b>        |    |                                                                                        |
| 4  | Key results              | 18 | Summarise key results with reference to study objectives                               |
| 5  | Limitations              | 19 | Discuss limitations of the study, taking into account sources of potential bias or     |
| 6  |                          |    | imprecision. Discuss both direction and magnitude of any potential bias                |
| 7  | Interpretation           | 20 | Give a cautious overall interpretation of results considering objectives, limitations, |
| 8  |                          |    | multiplicity of analyses, results from similar studies, and other relevant evidence    |
| 9  | Generalisability         | 21 | Discuss the generalisability (external validity) of the study results                  |
| 10 | <b>Other information</b> |    |                                                                                        |
| 11 | Funding                  | 22 | Give the source of funding and the role of the funders for the present study and, if   |
| 12 |                          |    | applicable, for the original study on which the present article is based               |
| 13 |                          |    |                                                                                        |
| 14 |                          |    |                                                                                        |
| 15 |                          |    |                                                                                        |
| 16 |                          |    |                                                                                        |
| 17 |                          |    |                                                                                        |
| 18 |                          |    |                                                                                        |
| 19 |                          |    |                                                                                        |
| 20 |                          |    |                                                                                        |
| 21 |                          |    |                                                                                        |
| 22 |                          |    |                                                                                        |
| 23 |                          |    |                                                                                        |
| 24 |                          |    |                                                                                        |
| 25 |                          |    |                                                                                        |
| 26 |                          |    |                                                                                        |
| 27 |                          |    |                                                                                        |
| 28 |                          |    |                                                                                        |
| 29 |                          |    |                                                                                        |
| 30 |                          |    |                                                                                        |
| 31 |                          |    |                                                                                        |
| 32 |                          |    |                                                                                        |
| 33 |                          |    |                                                                                        |
| 34 |                          |    |                                                                                        |
| 35 |                          |    |                                                                                        |
| 36 |                          |    |                                                                                        |
| 37 |                          |    |                                                                                        |
| 38 |                          |    |                                                                                        |
| 39 |                          |    |                                                                                        |
| 40 |                          |    |                                                                                        |
| 41 |                          |    |                                                                                        |
| 42 |                          |    |                                                                                        |
| 43 |                          |    |                                                                                        |
| 44 |                          |    |                                                                                        |
| 45 |                          |    |                                                                                        |
| 46 |                          |    |                                                                                        |
| 47 |                          |    |                                                                                        |
| 48 |                          |    |                                                                                        |
| 49 |                          |    |                                                                                        |
| 50 |                          |    |                                                                                        |
| 51 |                          |    |                                                                                        |
| 52 |                          |    |                                                                                        |
| 53 |                          |    |                                                                                        |
| 54 |                          |    |                                                                                        |
| 55 |                          |    |                                                                                        |
| 56 |                          |    |                                                                                        |
| 57 |                          |    |                                                                                        |
| 58 |                          |    |                                                                                        |
| 59 |                          |    |                                                                                        |
| 60 |                          |    |                                                                                        |

\*Give information separately for exposed and unexposed groups.

**Note:** An Explanation and Elaboration article discusses each checklist item and gives methodological background and published examples of transparent reporting. The STROBE checklist is best used in conjunction with this article (freely available on the Web sites of PLoS Medicine at <http://www.plosmedicine.org/>, Annals of Internal Medicine at <http://www.annals.org/>, and Epidemiology at <http://www.epidem.com/>). Information on the STROBE Initiative is available at <http://www.strobe-statement.org>.
